# Supplementary material for: Systematic evidence review of rates and burden of harm of intravenous admixture drug preparation errors in healthcare settings
Source: PubMed Central journal article supplement — BMJ Open. 2017 Dec 28;7(12):e015912. doi: 10.1136/bmjopen-2017-015912 (PMC5770837; doi:10.1136/bmjopen-2017-015912), 2017-12-28
Supplement: bmjopen-2017-015912.draft_revisions.pdf [file bmjopen-2017-015912.draft_revisions.pdf]

# BMJ Open

BMJ Open is committed to open peer review. As part of this commitment we make the peer review history of every article we publish publicly available.

When an article is published we post the peer reviewers' comments and the authors' responses online. We also post the versions of the paper that were used during peer review. These are the versions that the peer review comments apply to.

The versions of the paper that follow are the versions that were submitted during the peer review process. They are not the versions of record or the final published versions. They should not be cited or distributed as the published version of this manuscript.

BMJ Open is an open access journal and the full, final, typeset and author-corrected version of record of the manuscript is available on our site with no access controls, subscription charges or pay-per-view fees (<http://bmjopen.bmj.com>).

If you have any questions on BMJ Open's open peer review process please email [editorial.bmjopen@bmj.com](mailto:editorial.bmjopen@bmj.com)

# BMJ Open

## Systematic evidence review of rates and burden of harm of intravenous admixture drug preparation errors in healthcare settings

|                                    |                                                                                                                                                                                                                                                                                                                                                       |
|------------------------------------|-------------------------------------------------------------------------------------------------------------------------------------------------------------------------------------------------------------------------------------------------------------------------------------------------------------------------------------------------------|
| Journal:                           | <i>BMJ Open</i>                                                                                                                                                                                                                                                                                                                                       |
| Manuscript ID                      | bmjopen-2017-015912                                                                                                                                                                                                                                                                                                                                   |
| Article Type:                      | Research                                                                                                                                                                                                                                                                                                                                              |
| Date Submitted by the Author:      | 11-Jan-2017                                                                                                                                                                                                                                                                                                                                           |
| Complete List of Authors:          | Hedlund, Nancy; Baxter International Inc, Global HEOR<br>Beer, Idal; Baxter Healthcare Corporation, Global Medical Affairs<br>Hoppe-Tichy, Torsten; University Hospital of Heidelberg , Pharmacy<br>Department and Cooperation Unit Clinical Pharmacy; Ruprecht-Karls-<br>University of Heidelberg,<br>Trbovich, Patricia; University Health Network, |
| <b>Primary Subject<br>Heading</b>: | Evidence based practice                                                                                                                                                                                                                                                                                                                               |
| Secondary Subject Heading:         | Nursing                                                                                                                                                                                                                                                                                                                                               |
| Keywords:                          | Medication Errors, Drug Compounding, Intravenous Admixture Preparation<br>Error, Systematic Review                                                                                                                                                                                                                                                    |
|                                    |                                                                                                                                                                                                                                                                                                                                                       |

SCHOLARONE™  
Manuscripts

1  
2  
3 **Systematic evidence review of rates and burden of harm of intravenous admixture drug**  
4  
5 **preparation errors in healthcare settings**  
6  
7

8  
9 Nancy Hedlund,<sup>1\*</sup> Idal Beer,<sup>2</sup> Torsten Hoppe-Tichy,<sup>3</sup> Patricia Trbovich<sup>4</sup>  
10

11  
12 *<sup>1</sup>Baxter Healthcare Corporation, Global Health Economics and Outcomes Research, Deerfield,*  
13  
14 *Illinois, United States*  
15

16  
17 *<sup>2</sup>Baxter Healthcare Corporation, Medical Affairs, Deerfield Illinois, United States*  
18

19  
20 *<sup>3</sup>University Hospital of Heidelberg, Pharmacy Department and Cooperation Unit Clinical*  
21  
22 *Pharmacy, Ruprecht-Karls-University of Heidelberg, Heidelberg, Germany*  
23  
24

25  
26 *<sup>4</sup>University Health Network and University of Toronto, Institute of Health Policy, Management*  
27  
28 *and Evaluation, Toronto, Canada*  
29

30  
31  
32  
33 *\*Formerly of Baxter Healthcare Corporation, Deerfield Illinois, United States (During conduct*  
34  
35 *of the research)*  
36

37  
38 **Corresponding author:**  
39

40 Idal Beer, MD, MBA, MPH

41  
42 Baxter Healthcare Corporation

43  
44 One Baxter Parkway

45  
46 Deerfield, IL, USA 60015

47  
48 Telephone no.: 224-948-3336

49  
50 E-mail address: idal\_beer@baxter.com  
51  
52  
53  
54  
55  
56  
57  
58  
59  
60

## ABSTRACT

**Objective:** To examine published evidence on intravenous (IV) admixture preparation errors (IAPEs) in healthcare settings.

**Methods:** Searches were conducted in three electronic databases (January 2005 to September 2015). Publications reporting rates of IAPE and error types were reviewed and categorized into the following error groups: component errors, dose/calculation errors, aseptic technique errors, and composite errors.

**Results:** Of the 26 articles that met inclusion criteria, 21 reported on the site of IAPEs: central pharmacies (n=7), nursing wards (n=12), and both settings (n=2). Error types and reported rates varied substantially, including wrong drug (~0% to 4.7%), wrong diluent solution (0% to 49.0%), wrong label (3.2% to 99.0%), wrong dose (0.9% to 32.6%), wrong concentration (0% to 53.0%), wrong diluent volume (0.9% to 49.0%), and inadequate aseptic technique (0 to 69.2%). Only two studies directly compared incidence by preparation site and/or method of preparation, finding error incidence to be lower for doses prepared within central pharmacy than on the nursing ward, and lower for automated preparation versus manual preparation. Although eight studies (32%) reported  $\geq 1$  errors with the potential to cause patient harm, no study directly linked IAPE occurrences to specific adverse patient outcomes.

**Conclusions:** The available data suggest a need to continue to optimize the IV preparation process, focus on improving preparation facilities, design and implement preventive strategies, train staff on optimal admixture protocols, and implement a process of standardization. Future research should focus on the development of consistent error subtype definitions, standardized reporting methodology, and reliable, reproducible methods to track and link risk factors with the burden of harm associated with these errors.

### Strengths and limitations of this study

- This is the first systematic review conducted that attempts to categorize intravenous admixture preparation errors (IAPEs) according to both the characteristics of the error and the location and method of IV preparation.
- Although IAPE is a safety concern, its frequency, subtypes, and associated burden of harm are not well understood; thus, the current review presented a thoughtful and valid framework to assess IAPEs within their procedural context.
- This review attempted to include all articles published in English between January 2005 and September 2015 that reported on IAPEs in which healthcare professionals prepared  $\geq 1$  dose of IV administered therapy.
- This review is limited by the number of studies identified that reported data on the frequency and/or burden of harm of IAPEs.

## INTRODUCTION

Errors in medication preparation and administration can lead to patient harm.<sup>1-3</sup> For example, many preventable adverse events with respect to medication have been linked to errors in dosing (ie, patients receiving higher or lower amounts of medication than intended).<sup>2,4</sup> The medication use cycle for an intravenous (IV) medication involves multiple steps prior to administration, including prescribing and transcription (paper-based orders) in addition to a number of admixture preparation and labeling steps (**Figure 1**).

**Figure 1. Intravenous medication use cycle**

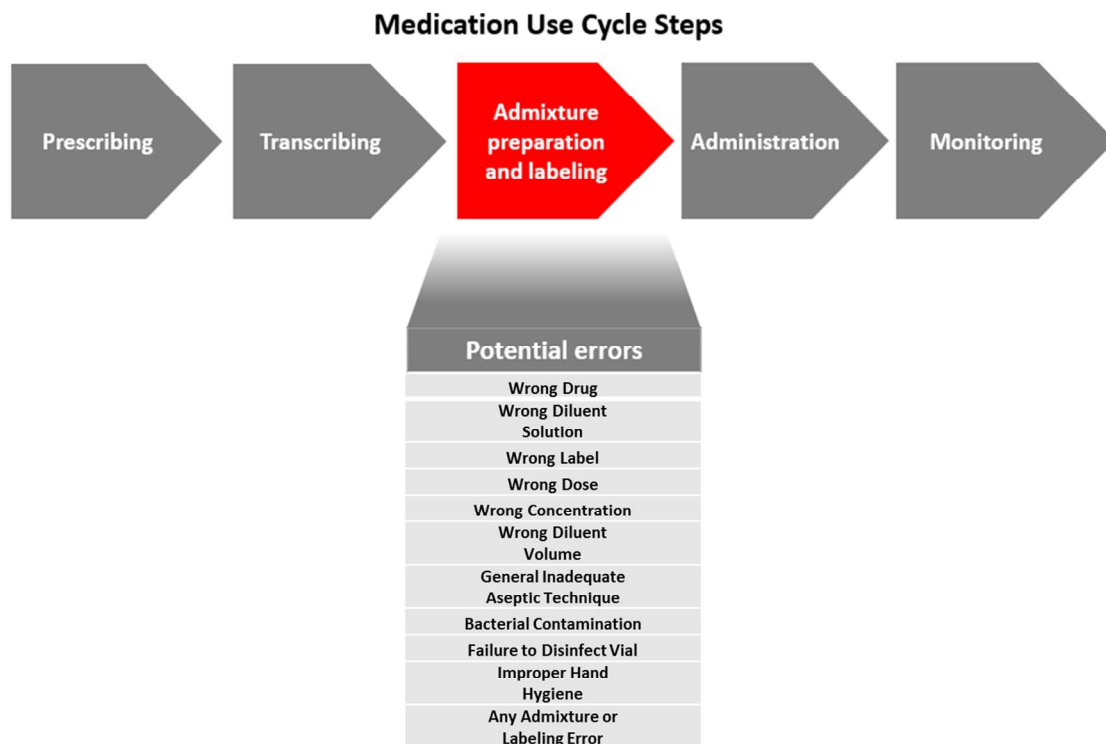

An IV admixture preparation error (IAPE) can be considered as any deviation from the specifications involved in the admixture preparation and labeling process. An IAPE is a form of medication error—in other words, a preventable adverse event resulting from inappropriate

1  
2  
3 medication preparation, administration, or use that can lead to patient harm, including death,  
4 while the medication is in the control of the healthcare professional, patient, or consumer.<sup>5,6</sup>  
5  
6  
7

8 IAPEs can be introduced at multiple points during admixture preparation and labeling.  
9  
10 These steps can take place on site at a nursing ward or in a central or satellite pharmacy. IV  
11 medication doses are typically prepared (1) manually by nurses, either at the bedside or in a  
12 ward-based preparation room, (2) manually by pharmacists and pharmacy technicians in a  
13 central or satellite clean room under a laminar-airflow hood, or (3) through the use of pharmacy  
14 automation technology, which can be partially or fully automated and may be located in clean  
15 rooms or clean compartments within the machine. Delivery of the correct dose of an IV  
16 admixture to a patient depends on the careful control of many factors, such as the calculation of a  
17 patient-specific dose, oversight of procedures utilized for admixture preparation, and labeling  
18 practices.<sup>4,7</sup> While research suggests that the highest medication-error rates can be attributed to  
19 the prescribing and administration phases of the medication use cycle,<sup>8-10</sup> studies focused on  
20 medication preparation practices suggest that there is a significant potential for errors in the IV  
21 admixture preparation and labeling phase as well.<sup>8,11-14</sup> It is unknown what proportion of IAPEs  
22 go unreported.  
23  
24  
25  
26  
27  
28  
29  
30  
31  
32  
33  
34  
35  
36  
37  
38  
39  
40  
41

42 In addition to measuring the incidence of IAPEs, it is also important to understand their  
43 impact in terms of burden of harm. Two examples of existing frameworks for categorizing  
44 patient harm resulting from medication errors are The Institute for Safe Medication Practices  
45 (ISMP) high-alert medication lists and The National Coordinating Council for Medication Error  
46 Reporting and Prevention (NCC MERP) Medication Error Index. ISMP publishes information  
47 and educational resources for healthcare providers on preventing medication errors, and tracks  
48 voluntary medication errors reports. Based on these voluntary error reports, ISMP maintains lists  
49  
50  
51  
52  
53  
54  
55  
56  
57  
58  
59  
60

1  
2  
3 of high-alert medications in outpatient and inpatient settings that have the potential for increased  
4 risk of patient harm if used in error.<sup>15</sup> The NCC MERP Medication Error Index groups  
5 medication errors into nine possible categories, ranging from non-errors (situations in which  
6 errors may occur) to errors resulting in patient death.<sup>16</sup> These categories also include near-miss  
7 situations in which an error occurred but did not reach the patient or cause harm. ISMP uses the  
8 NCC MERP Medication Error Index in its medication error database.  
9  
10  
11  
12  
13  
14  
15  
16

17  
18 Much of the prior published research focusing on the prescription or administration of IV  
19 therapies has failed to describe or distinguish between errors that arise as a result of the  
20 admixture preparation process versus errors associated with incorrect prescribing or  
21 administration.<sup>17-20</sup> With this systematic review, our objective is to identify the incidence of  
22 IAPes (overall and by subtype) reported across institutional healthcare settings and to understand  
23 the frequency of error subtypes and associated burden of patient harm attributable to IAPes as  
24 reported in the published literature.  
25  
26  
27  
28  
29  
30  
31  
32  
33  
34  
35  
36  
37

## 38 **METHODS**

### 39 **Identification of literature and data sources**

40  
41  
42 For the purposes of this review, an IAPE was defined as an error or deviation at any step within  
43 the admixture preparation process where the drug container was physically handled or  
44 manipulated by a healthcare professional. A broad search strategy was developed to identify all  
45 studies (published from January 2005 to September 2015) that mention any type of IAPE in an  
46 institutional healthcare setting, which included reports relating to wrong drug, wrong diluent  
47 solution, wrong label, wrong dose, wrong concentration, wrong diluent volume, and inadequate  
48  
49  
50  
51  
52  
53  
54  
55  
56  
57  
58  
59  
60



1  
2  
3 aseptic technique. Dose omission errors were considered to be errors related to administration  
4 rather than preparation and, thus, were not included as a focus in this study. Near-miss and actual  
5 errors (those that did reach patients) were both included. The review was structured based on  
6  
7  
8  
9  
10  
11  
12  
13  
14  
15  
16  
17  
18  
19  
20  
21  
22  
23  
24  
25  
26  
27  
28  
29  
30  
31  
32  
33  
34  
35  
36  
37  
38  
39  
40  
41  
42  
43  
44  
45  
46  
47  
48  
49  
50  
51  
52  
53  
54  
55  
56  
57  
58  
59  
60

**Table 1. PICOS Criteria**

|                        |                                                                                                                                                                                                                                                                                                                                                                                                                                                                                                                              |
|------------------------|------------------------------------------------------------------------------------------------------------------------------------------------------------------------------------------------------------------------------------------------------------------------------------------------------------------------------------------------------------------------------------------------------------------------------------------------------------------------------------------------------------------------------|
| <b>Patient/Problem</b> | Incorrect preparation of IV admixtures within an institutional healthcare setting (acute or long-term care) by a licensed healthcare professional (nursing and/or pharmacy staff and/or physician) team member                                                                                                                                                                                                                                                                                                               |
| <b>Intervention</b>    | Preparation of an IV admixture                                                                                                                                                                                                                                                                                                                                                                                                                                                                                               |
| <b>Comparison</b>      | Automated versus manual preparation methods(studies were not required to demonstrate both)<br>Central pharmacy versus on-unit (on the nursing ward) preparation location (studies were not required to demonstrate both)                                                                                                                                                                                                                                                                                                     |
| <b>Outcome</b>         | Incorrectly prepared or labeled IV admixture, which may or may not have reached a patient: <ul style="list-style-type: none"> <li>• Wrong drug or diluent</li> <li>• Wrong dose, concentration, or volume</li> <li>• Wrong, inaccurate, or omitted label</li> <li>• Contaminated admixture or failure to follow hygiene or sterility protocols</li> <li>• A combination of the above</li> </ul>                                                                                                                              |
| <b>Study Types</b>     | <p><b>Inclusion criteria:</b> Observational studies for which numerator (number of doses impacted or number of errors) and denominator (number of eligible doses or opportunities for error) are discernible</p> <p><b>Exclusion criteria:</b> Studies in which isolated contamination volumes are reported but for which total batch size is unknown fail to qualify for consideration</p> <p>Error report logs for which number of errors is known but associated number of prepared doses is not also fail to qualify</p> |

PICOS, patients, intervention, comparator, outcomes, and study design (criteria); IV, intravenous.

## Systematic review process

Three electronic databases were searched for relevant literature reporting on IAPE: Ovid MEDLINE, EMBASE, and International Pharmaceutical Abstracts. The initial search was conducted on February 6, 2014, with supplementation on September 4, 2015 to include articles published during the interim. Aggregate results include articles published in English between January 2005 and September 2015 that involved studies in human subjects in which a healthcare professional prepared  $\geq 1$  doses of IV administered therapy (medication or total parenteral nutrition). Key search terms and limits used in the systematic review are shown in **online supplementary Table S1**. Screenings for relevant literature citations that appeared in the publications were made during the review process to identify any pertinent, additional publications up to September 2015. To be included in this systematic review, references had to meet the inclusion/exclusion criteria detailed in the next section. Duplicate articles were removed electronically prior to manual review. Titles of the papers and abstracts captured in the electronic search results were screened by two reviewers for relevancy according to prespecified criteria. If the titles did not provide sufficient information for screening, the abstract or full-text articles were then reviewed to discern whether the publication met inclusion criteria. All publications that met entry criteria for the review were obtained as full-text articles and then reassessed by the reviewers against the review criteria. The review process was fully compliant with the 2009 Preferred Reporting Items for Systematic Reviews and Meta-Analyses (PRISMA) guidelines.<sup>21</sup>

## Inclusion and exclusion criteria

Publications reporting on a randomized, controlled trial, prospective cohort study, observational quality audit, descriptive study, quasi-experimental study, or quality-improvement study were selected for inclusion. Quasi-experimental studies, quality-improvement studies, and descriptive

1  
2  
3 studies were eligible if they included sufficient data on the number of doses prepared. While  
4  
5 systematic reviews reporting on these study types were not included, their respective reference  
6  
7 lists were reviewed to identify potentially relevant studies. Publications were not limited to a  
8  
9 single geographic or physical study location and may have occurred in the hospital or any other  
10  
11 institutional or outpatient healthcare setting.  
12  
13

14  
15 Publications and studies were included for review if they either reported incidence of  
16  
17 IAPE or provided sufficient detail for incidence calculation. These errors included incorrectly  
18  
19 dispensed medication as well as near-misses that were caught by the study observer prior to  
20  
21 administration. Errors also had to originate from a healthcare professional (eg, nurse or  
22  
23 pharmacist). Studies reporting patient or informal caregiver medication errors were not included.  
24  
25 To be included, studies were required to report original data on IAPes, including a denominator  
26  
27 to allow for incidence calculations.  
28  
29  
30  
31  
32

33 Articles and studies that only described errors in prescribing, transcription,  
34  
35 administration, and monitoring were not included. In addition to all articles that failed to meet  
36  
37 the aforementioned inclusion criteria, the following article types were also excluded: conference  
38  
39 abstracts, case reports, simulations, and survey findings.  
40  
41  
42

### 43 **Data extraction**

44  
45 The data extracted from relevant articles for analysis included year of publication, country of  
46  
47 origin, study period, patient population, definition of error, IV preparation location (eg, central or  
48  
49 satellite pharmacy or nursing ward), care setting (eg, critical care, general nursing ward), type of  
50  
51 therapy, method of error detection, and error incidence. Data were extracted and scored  
52  
53 independently by two separate reviewers, with introduction of a third reviewer in the case of  
54  
55  
56  
57  
58  
59  
60

1  
2  
3 scoring discrepancies, with all differences being resolved by consensus. Each review team  
4 included  $\geq$ one pharmacist, given their professional knowledge and understanding of drug  
5 preparation. The methodological rigor of each study was critically appraised and scored using the  
6 Hawker method.<sup>22</sup> This method employs nine criteria to evaluate for each study: 1) abstract and  
7 title, 2) introduction and aims, 3) method and data, 4) sampling, 5) data analysis, 6) ethics and  
8 bias, 7) results, 8) transferability or generalizability, and 9) implications and usefulness. For each  
9 criterion, studies were scored as: good (score 4), fair (score 3), poor (score 2), or very poor  
10 (score 1). A mean score was then calculated for each study across all nine criteria, and the  
11 overall quality of each study was likewise scored from good to very poor.  
12  
13  
14  
15  
16  
17  
18  
19  
20  
21  
22  
23  
24

25 For the purposes of this review, IAPEs were grouped into one of four categories based on  
26 the characteristics of the error and the location and method of IV preparation. Component errors  
27 were defined as all those that result from selecting an incorrect ingredient (ie, wrong drug or  
28 wrong diluent solution), or applying an incorrect, incomplete, or inaccurate label (ie, wrong  
29 label) to the admixture. Dose/calculation errors were defined as those involving the use of an  
30 incorrect calculation to determine dose and/or diluent amount, or use of a diluent volume not in  
31 accordance with the package insert (ie, wrong dose, wrong concentration, and wrong diluent  
32 volume). Aseptic technique errors involved a breakdown in the process designed to minimize the  
33 potential for antimicrobial contamination (ie, inadequate aseptic technique, bacterial  
34 contamination, failure to disinfect vial, and improper hand hygiene). The category of composite  
35 errors was used to describe IAPEs reported in aggregate, without differentiating between IAPE  
36 subtypes.  
37  
38  
39  
40  
41  
42  
43  
44  
45  
46  
47  
48  
49  
50  
51  
52  
53

54 This study was registered with the PROSPERO international database of systematic  
55 reviews (CRD42014010418) to comply with PRISMA guidelines.  
56  
57  
58  
59  
60

## RESULTS

Electronic database searches yielded 1724 English language publications for review. Additional sources (hand searches of publication reference lists) identified another three publications for evaluation. After removing duplicates and screening for inclusion and exclusion criteria, 26 articles were included in the final analysis (**Figure 2**).<sup>3,23-47</sup> Of the 26 articles, 5 (19%) were rated good quality,<sup>27,32,36,43,44</sup> 17 (65%) were fair quality,<sup>3,23-26,28-31,34,35,37-39,41,42,46</sup> and 3 (12%) were poor quality<sup>33,40</sup> after assessment using the Hawker method. The quality of one study (4%) could not be fully scored due to a missing data table in the available publication.<sup>45</sup>

**Figure 2. PRISMA study inclusion flow diagram**

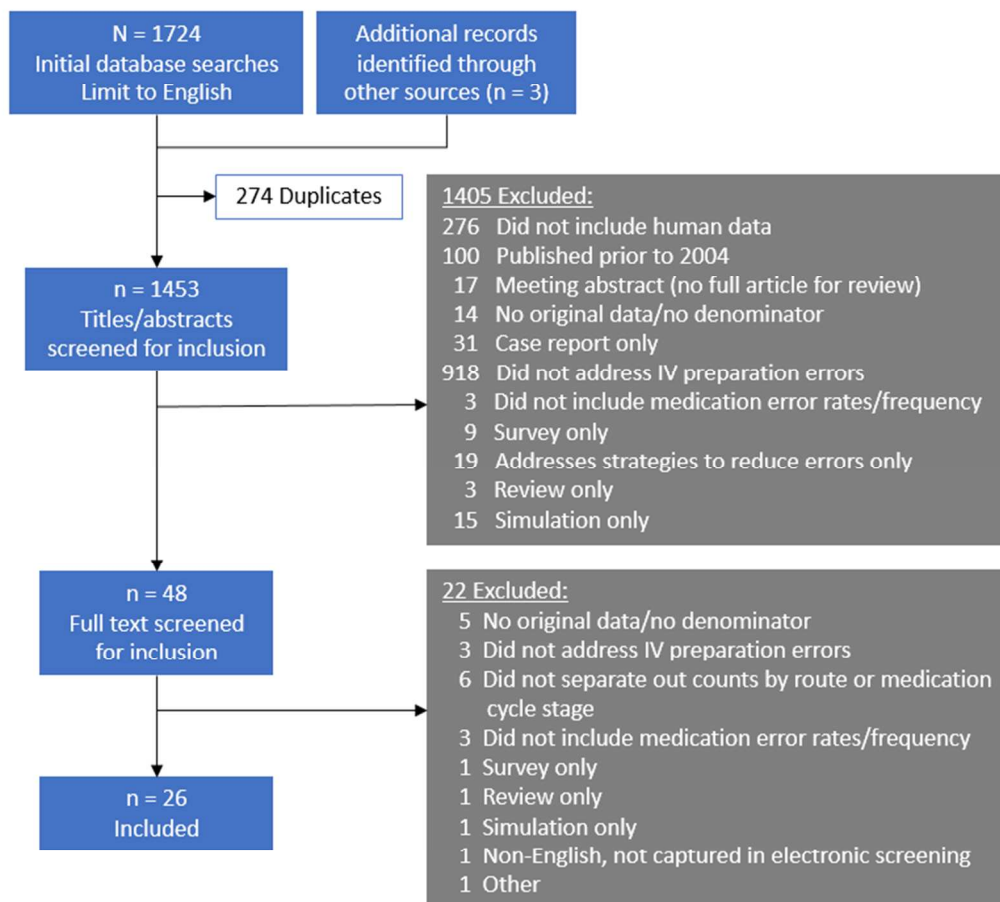

## Study characteristics

A summary of the study characteristics, patient populations, and types of IV therapies described in the 26 publications is illustrated in **Table 2**. Collectively, the publications reported international data, with 9 of the 26 studies (35%) conducted in Europe (Germany: 3<sup>24,28,44</sup>; France: 1,<sup>25</sup> Greece: 1,<sup>40</sup> Italy: 1,<sup>34</sup> Spain: 1,<sup>37</sup> United Kingdom [UK]: 1,<sup>41</sup> France, Germany, and the UK: 1 multinational study).<sup>26</sup> Five studies (19%) were conducted in the United States.<sup>27,33,38,39,42</sup> There were four studies (15%) from Iran,<sup>29,30,45,47</sup> two from Brazil (8%),<sup>23,31</sup> and one each (4%) from Australia,<sup>3</sup> Canada,<sup>36</sup> Malaysia,<sup>35</sup> Vietnam,<sup>43</sup> China<sup>46</sup> and Mexico.<sup>32</sup>

The majority of references (22 [85%]) reported single-center studies (**Table 2**). One study (4%) reported data from two major teaching hospitals<sup>3</sup>, and three studies (12%) were conducted at three hospitals.<sup>23,26,47</sup>

1  
2  
3  
4  
5  
6  
7  
8  
9  
10  
11  
12  
13  
14  
15  
16  
17  
18  
19  
20  
21  
22  
23  
24  
25  
26  
27  
28  
29  
30  
31  
32  
33  
34  
35  
36  
37  
38  
39  
40  
41  
42  
43  
44  
45  
46  
47  
48  
49

**Table 2. Study Characteristics**

| Study                              | Geographical Location(s) | Centers, n | Patient Population                      | Study Design | Observational Technique                                            | Type of Intravenous Admixture | Location of Intravenous Admixture Preparation | Method of Intravenous Admixture Preparation | Patient Impact Measured (Yes / No) |
|------------------------------------|--------------------------|------------|-----------------------------------------|--------------|--------------------------------------------------------------------|-------------------------------|-----------------------------------------------|---------------------------------------------|------------------------------------|
| Anselmi et al. 2007 <sup>23</sup>  | Brazil                   | 3          | General inpatient units                 | Single arm   | Direct observation                                                 | Multiple IV therapies         | Nursing ward                                  | Manual                                      | No                                 |
| Bertsche et al. 2008 <sup>24</sup> | Germany                  | 1          | General inpatient units and ICU         | Single arm   | Direct observation                                                 | Multiple IV therapies         | Nursing ward                                  | Manual                                      | Yes                                |
| Castagne et al. 2011 <sup>25</sup> | France                   | 1          | Oncology inpatients                     | Single arm   | Final concentration of admixture<br>Direct observation             | Chemotherapy                  | Central pharmacy                              | Automated                                   | No                                 |
| Cousins et al. 2005 <sup>26</sup>  | France<br>Germany<br>UK  | 3          | General medical and surgical inpatients | Single arm   | (participants in France and Germany were blinded to study purpose) | Multiple IV therapies         | Nursing ward                                  | Manual                                      | No                                 |
| Crill et al. 2010 <sup>27</sup>    | US                       | 1          | Critical care (NICU)                    | Single arm   | Bacterial culture                                                  | Intravenous fat emulsion      | Central pharmacy                              | Manual                                      | Yes                                |
| Dehmel et al. 2011 <sup>28</sup>   | Germany                  | 1          | Critical care (ICU)                     | Comparative  | Final concentration of admixture                                   | Multiple IV therapies         | Central pharmacy vs nursing ward              | Automated vs manual                         | No                                 |
| Ding et al. 2015 <sup>46</sup>     | China                    | 1          | General surgery inpatients              | Single arm   | Direct observation                                                 | Multiple IV therapies         | Nursing ward                                  | Manual                                      | Yes                                |

|    |                    |         |   |                                      |                |                                                                       |                          |                                     |              |     |
|----|--------------------|---------|---|--------------------------------------|----------------|-----------------------------------------------------------------------|--------------------------|-------------------------------------|--------------|-----|
| 1  |                    |         |   |                                      |                |                                                                       |                          |                                     |              |     |
| 2  |                    |         |   |                                      |                |                                                                       |                          |                                     |              |     |
| 3  | Fahimi et al.      |         |   |                                      |                |                                                                       |                          |                                     |              |     |
| 4  | 2007 <sup>29</sup> | Iran    | 1 | Critical care (ICU)                  | Single arm     | Direct observation                                                    | Multiple IV              | Nursing ward                        | Manual       | Yes |
| 5  |                    |         |   |                                      |                |                                                                       | therapies                |                                     |              |     |
| 6  | Fahimi et al.      |         |   |                                      |                |                                                                       |                          |                                     |              |     |
| 7  | 2008 <sup>30</sup> | Iran    | 1 | Critical care (ICU)                  | Single arm     | Direct observation                                                    | Multiple IV              | Nursing ward                        | Manual       | Yes |
| 8  |                    |         |   |                                      |                |                                                                       | therapies                |                                     |              |     |
| 9  | Hoefel et al.      |         |   |                                      |                |                                                                       |                          |                                     |              |     |
| 10 | 2006 <sup>31</sup> | Brazil  | 1 | General units and<br>ICU             | Single arm     | Direct observation                                                    | Antibiotic<br>(cefepime) | Nursing ward                        | Manual       | No  |
| 11 |                    |         |   |                                      |                |                                                                       |                          |                                     |              |     |
| 12 | Khalili et al.     |         |   |                                      |                |                                                                       |                          |                                     |              |     |
| 13 | 2013 <sup>47</sup> | Iran    | 3 | Adult and pediatric<br>inpatients    | Comparative    | Bacterial culture                                                     | Multiple IV<br>therapies | Central pharmacy vs<br>nursing ward | Manual       | No  |
| 14 |                    |         |   |                                      |                |                                                                       |                          |                                     |              |     |
| 15 | Macias et al.      |         |   |                                      |                |                                                                       |                          |                                     |              |     |
| 16 | 2005 <sup>32</sup> | Mexico  | 1 | Critical care<br>(NICU)              | Single arm     | Bacterial culture                                                     | Multiple IV<br>therapies | Nursing ward                        | Manual       | No  |
| 17 |                    |         |   |                                      |                |                                                                       |                          |                                     |              |     |
| 18 | MacKay et al.      |         |   |                                      |                |                                                                       |                          |                                     |              |     |
| 19 | 2009 <sup>33</sup> | US      | 1 | Pediatric trauma<br>unit             | Interventional | Cross-check                                                           | Multiple IV<br>therapies | Central pharmacy                    | Automated    | No  |
| 20 |                    |         |   |                                      |                |                                                                       |                          |                                     |              |     |
| 21 |                    |         |   |                                      |                |                                                                       |                          |                                     |              |     |
| 22 |                    |         |   |                                      |                |                                                                       |                          |                                     | Automated    |     |
| 23 | Masini et al.      |         |   |                                      |                |                                                                       |                          |                                     |              |     |
| 24 | 2014 <sup>34</sup> | Italy   | 1 | Inpatient and<br>outpatient oncology | Comparative    | Final concentration of<br>admixture                                   | Chemotherapy             | Central pharmacy                    | vs<br>manual | No  |
| 25 |                    |         |   |                                      |                |                                                                       |                          |                                     |              |     |
| 26 |                    |         |   |                                      |                |                                                                       |                          |                                     |              |     |
| 27 |                    |         |   |                                      |                | Direct observation;                                                   |                          |                                     |              |     |
| 28 |                    |         |   |                                      |                | Pharmacists reviewed                                                  |                          |                                     |              |     |
| 29 | Moniz et al.       |         |   |                                      |                |                                                                       |                          |                                     |              |     |
| 30 | 2014 <sup>42</sup> | US      | 1 | Pediatric inpatients                 | Single arm     | digital photos of each<br>preparation step via a<br>web application   | Multiple IV<br>therapies | Central pharmacy                    | Automated    | Yes |
| 31 |                    |         |   |                                      |                |                                                                       |                          |                                     |              |     |
| 32 |                    |         |   |                                      |                |                                                                       |                          |                                     |              |     |
| 33 |                    |         |   |                                      |                |                                                                       |                          |                                     |              |     |
| 34 |                    |         |   |                                      |                |                                                                       |                          |                                     |              |     |
| 35 | Nguyen et al.      |         |   |                                      |                |                                                                       |                          |                                     |              |     |
| 36 | 2014 <sup>43</sup> | Vietnam | 1 | Critical care (ICU /<br>PSU)         | Interventional | Direct observation<br>(participants were blinded<br>to study purpose) | Multiple IV<br>therapies | Not specified                       | Manual       | Yes |
| 37 |                    |         |   |                                      |                |                                                                       |                          |                                     |              |     |
| 38 |                    |         |   |                                      |                |                                                                       |                          |                                     |              |     |
| 39 | Niemann et al.     |         |   |                                      |                |                                                                       |                          |                                     |              |     |
| 40 | 2014 <sup>44</sup> | Germany | 1 | Pediatric inpatients                 | Interventional | Direct observation                                                    | Multiple IV<br>therapies | Not specified                       | Manual       | Yes |
| 41 |                    |         |   |                                      |                |                                                                       |                          |                                     |              |     |
| 42 |                    |         |   |                                      |                |                                                                       |                          |                                     |              |     |
| 43 |                    |         |   |                                      |                |                                                                       |                          |                                     |              |     |
| 44 |                    |         |   |                                      |                |                                                                       |                          |                                     |              |     |
| 45 |                    |         |   |                                      |                |                                                                       |                          |                                     |              |     |
| 46 |                    |         |   |                                      |                |                                                                       |                          |                                     |              |     |
| 47 |                    |         |   |                                      |                |                                                                       |                          |                                     |              |     |
| 48 |                    |         |   |                                      |                |                                                                       |                          |                                     |              |     |
| 49 |                    |         |   |                                      |                |                                                                       |                          |                                     |              |     |



|    |                           |           |   |                      |             |                            |                  |                  |               |     |
|----|---------------------------|-----------|---|----------------------|-------------|----------------------------|------------------|------------------|---------------|-----|
| 1  |                           |           |   | General and acute    |             |                            |                  |                  |               |     |
| 2  |                           |           |   |                      |             |                            |                  |                  |               |     |
| 3  |                           |           |   |                      |             |                            |                  |                  |               |     |
| 4  | Ong et al.                | Malaysia  | 1 | care, adult and      | Single arm  | Direct observation         | Multiple IV      | Nursing ward     | Manual        | No  |
| 5  | 2013 <sup>35</sup>        |           |   | pediatric inpatients |             |                            | therapies        |                  |               |     |
| 6  |                           |           |   | Pediatric oncology   |             |                            |                  |                  |               |     |
| 7  |                           |           |   | (not specified if    |             |                            |                  |                  |               |     |
| 8  |                           |           |   | inpatient or         | Single arm  | Final concentration of     | Chemotherapy     | Not specified    | Not specified | No  |
| 9  | Parshuram et              | Canada    | 1 | outpatient)          |             | admixture                  |                  |                  |               |     |
| 10 | al. 2006 <sup>36</sup>    |           |   |                      |             |                            |                  |                  |               |     |
| 11 |                           |           |   |                      |             |                            |                  |                  |               |     |
| 12 |                           |           |   |                      |             |                            |                  |                  |               |     |
| 13 |                           |           |   |                      |             |                            |                  |                  |               |     |
| 14 | Rodriguez-                |           |   | Gastroenterology     |             | Direct observation         | Multiple IV      |                  |               |     |
| 15 | Gonzalez et al.           | Spain     | 1 | inpatients           | Single arm  | (participants were blinded | therapies        | Not specified    | Not specified | Yes |
| 16 | 2011 <sup>37</sup>        |           |   |                      |             | to study purpose)          |                  |                  |               |     |
| 17 |                           |           |   |                      |             |                            |                  |                  |               |     |
| 18 |                           |           |   |                      |             |                            |                  |                  |               |     |
| 19 |                           |           |   | General adult and    |             |                            | Total parenteral |                  |               |     |
| 20 | Sacks et al.              | US        | 1 | pediatric inpatient  | Single arm  | Incident reports           | nutrition        | Central pharmacy | Automated     | Yes |
| 21 | 2009 <sup>38</sup>        |           |   | units and ICU        |             |                            |                  |                  |               |     |
| 22 |                           |           |   |                      |             |                            |                  |                  | Automated     |     |
| 23 |                           |           |   |                      |             |                            |                  |                  |               |     |
| 24 |                           |           |   |                      |             |                            |                  |                  |               |     |
| 25 | Seger et al.              | US        | 1 | Oncology inpatients  | Comparative | Direct observation         | Chemotherapy     | Central pharmacy | vs            | Yes |
| 26 | 2012 <sup>39</sup>        |           |   |                      |             |                            |                  |                  | manual        |     |
| 27 |                           |           |   |                      |             |                            |                  |                  |               |     |
| 28 |                           |           |   |                      |             |                            |                  |                  | Automated     |     |
| 29 | Skouroliakou              | Greece    | 1 | Neonatal inpatients  | Comparative | Cross-check and direct     | Total parenteral | Not specified    | vs            | No  |
| 30 | et al. 2005 <sup>40</sup> |           |   |                      |             | observation                | nutrition        |                  | manual        |     |
| 31 |                           |           |   |                      |             |                            |                  |                  |               |     |
| 32 |                           |           |   |                      |             |                            |                  |                  |               |     |
| 33 | Tavakoli-                 |           |   | Hematology and       |             |                            |                  |                  |               |     |
| 34 | Ardakani et al.           | Iran      | 1 | oncology inpatients  | Single arm  | Direct observation         | Chemotherapy     | Nursing ward     | Manual        | No  |
| 35 | 2013 <sup>45</sup>        |           |   | and outpatients      |             |                            |                  |                  |               |     |
| 36 |                           |           |   |                      |             |                            |                  |                  |               |     |
| 37 |                           |           |   |                      |             |                            |                  |                  |               |     |
| 38 | Westbrook et              | Australia | 2 | General and          | Single arm  | Direct observation         | Multiple IV      | Nursing ward     | Manual        | Yes |
| 39 | al. 2011 <sup>3</sup>     |           |   | surgical inpatients  |             |                            | therapies        |                  |               |     |
| 40 |                           |           |   |                      |             |                            |                  |                  |               |     |
| 41 |                           |           |   |                      |             |                            |                  |                  |               |     |
| 42 |                           |           |   |                      |             |                            |                  |                  |               |     |
| 43 |                           |           |   |                      |             |                            |                  |                  |               |     |
| 44 |                           |           |   |                      |             |                            |                  |                  |               |     |
| 45 |                           |           |   |                      |             |                            |                  |                  |               |     |
| 46 |                           |           |   |                      |             |                            |                  |                  |               |     |
| 47 |                           |           |   |                      |             |                            |                  |                  |               |     |
| 48 |                           |           |   |                      |             |                            |                  |                  |               |     |
| 49 |                           |           |   |                      |             |                            |                  |                  |               |     |

|    |                                                                                                                                                                                                   |    |                |                |             |             |              |        |    |
|----|---------------------------------------------------------------------------------------------------------------------------------------------------------------------------------------------------|----|----------------|----------------|-------------|-------------|--------------|--------|----|
| 1  |                                                                                                                                                                                                   |    |                |                |             |             |              |        |    |
| 2  |                                                                                                                                                                                                   |    |                |                |             |             |              |        |    |
| 3  |                                                                                                                                                                                                   |    | Critical care  |                |             |             |              |        |    |
| 4  | Wheeler et al.                                                                                                                                                                                    |    | (neurological) | Interventional | Cross-check | Multiple IV | Nursing ward | Manual | No |
| 5  | 2008 <sup>41</sup>                                                                                                                                                                                | UK | inpatients     |                |             | therapies   |              |        |    |
| 6  |                                                                                                                                                                                                   | 1  |                |                |             |             |              |        |    |
| 7  |                                                                                                                                                                                                   |    |                |                |             |             |              |        |    |
| 8  |                                                                                                                                                                                                   |    |                |                |             |             |              |        |    |
| 9  | <hr/>                                                                                                                                                                                             |    |                |                |             |             |              |        |    |
| 10 | Method of preparation was assumed to be manual for studies in which IV admixture preparation occurred in the nursing ward, and no other information regarding method of preparation was provided. |    |                |                |             |             |              |        |    |
| 11 | ICU, intensive care unit; IV, intravenous; NICU, neonatal intensive care unit; PSU, post-surgical unit; UK, United Kingdom; US, United States.                                                    |    |                |                |             |             |              |        |    |
| 12 |                                                                                                                                                                                                   |    |                |                |             |             |              |        |    |
| 13 |                                                                                                                                                                                                   |    |                |                |             |             |              |        |    |
| 14 |                                                                                                                                                                                                   |    |                |                |             |             |              |        |    |
| 15 |                                                                                                                                                                                                   |    |                |                |             |             |              |        |    |
| 16 |                                                                                                                                                                                                   |    |                |                |             |             |              |        |    |
| 17 |                                                                                                                                                                                                   |    |                |                |             |             |              |        |    |
| 18 |                                                                                                                                                                                                   |    |                |                |             |             |              |        |    |
| 19 |                                                                                                                                                                                                   |    |                |                |             |             |              |        |    |
| 20 |                                                                                                                                                                                                   |    |                |                |             |             |              |        |    |
| 21 |                                                                                                                                                                                                   |    |                |                |             |             |              |        |    |
| 22 |                                                                                                                                                                                                   |    |                |                |             |             |              |        |    |
| 23 |                                                                                                                                                                                                   |    |                |                |             |             |              |        |    |
| 24 |                                                                                                                                                                                                   |    |                |                |             |             |              |        |    |
| 25 |                                                                                                                                                                                                   |    |                |                |             |             |              |        |    |
| 26 |                                                                                                                                                                                                   |    |                |                |             |             |              |        |    |
| 27 |                                                                                                                                                                                                   |    |                |                |             |             |              |        |    |
| 28 |                                                                                                                                                                                                   |    |                |                |             |             |              |        |    |
| 29 |                                                                                                                                                                                                   |    |                |                |             |             |              |        |    |
| 30 |                                                                                                                                                                                                   |    |                |                |             |             |              |        |    |
| 31 |                                                                                                                                                                                                   |    |                |                |             |             |              |        |    |
| 32 |                                                                                                                                                                                                   |    |                |                |             |             |              |        |    |
| 33 |                                                                                                                                                                                                   |    |                |                |             |             |              |        |    |
| 34 |                                                                                                                                                                                                   |    |                |                |             |             |              |        |    |
| 35 |                                                                                                                                                                                                   |    |                |                |             |             |              |        |    |
| 36 |                                                                                                                                                                                                   |    |                |                |             |             |              |        |    |
| 37 |                                                                                                                                                                                                   |    |                |                |             |             |              |        |    |
| 38 |                                                                                                                                                                                                   |    |                |                |             |             |              |        |    |
| 39 |                                                                                                                                                                                                   |    |                |                |             |             |              |        |    |
| 40 |                                                                                                                                                                                                   |    |                |                |             |             |              |        |    |
| 41 |                                                                                                                                                                                                   |    |                |                |             |             |              |        |    |
| 42 |                                                                                                                                                                                                   |    |                |                |             |             |              |        |    |
| 43 |                                                                                                                                                                                                   |    |                |                |             |             |              |        |    |
| 44 |                                                                                                                                                                                                   |    |                |                |             |             |              |        |    |
| 45 |                                                                                                                                                                                                   |    |                |                |             |             |              |        |    |
| 46 |                                                                                                                                                                                                   |    |                |                |             |             |              |        |    |
| 47 |                                                                                                                                                                                                   |    |                |                |             |             |              |        |    |
| 48 |                                                                                                                                                                                                   |    |                |                |             |             |              |        |    |
| 49 |                                                                                                                                                                                                   |    |                |                |             |             |              |        |    |

Method of preparation was assumed to be manual for studies in which IV admixture preparation occurred in the nursing ward, and no other information regarding method of preparation was provided.

ICU, intensive care unit; IV, intravenous; NICU, neonatal intensive care unit; PSU, post-surgical unit; UK, United Kingdom; US, United States.

1  
2  
3 Various methods of detection were used including direct observation in 15 studies  
4 (58%),<sup>3,23,24,26,29-31,35,39,42-46</sup>, analysis of final concentration in four studies (19%),<sup>25,28,34,36,41</sup>  
5  
6 bacterial culture in three studies (12%),<sup>27,32,47</sup>, cross-checking in three studies (8%)<sup>33,40,37</sup>, and  
7  
8 incident reports in one study (4%).<sup>38</sup> In several studies using the direct observation method,  
9  
10 nurses or pharmacists preparing the IV admixtures consented to participate but were not fully  
11  
12 aware of the study aims to avoid influencing their behavior.<sup>17,37,43</sup> Four studies (15%) reported on  
13  
14 the accuracy of IV preparation before and after an intervention,<sup>33,41,43,44</sup> five studies (19%)  
15  
16 compared IV admixture preparation locations or methods,<sup>28,34,39,40,47</sup> and the remaining 17  
17  
18 publications (65%) were single-arm studies.<sup>3,23-27,29-32,35-38,42,45,46</sup>  
19  
20  
21  
22  
23  
24

25 Seven publications (27%) reported on IV therapies prepared for use in pediatric  
26  
27 populations only,<sup>27,32,33,36,40,42,44</sup> three studies (12%) included a mix of pediatric and adult  
28  
29 patients,<sup>35,38,47</sup> six studies (23%) described treatment of adult patient populations,<sup>3,28,31,37,39,41</sup> and  
30  
31 the remaining 10 publications (38%) did not characterize the age groups studied.<sup>23-26,29,30,34,43,45,46</sup>  
32  
33  
34 Seven studies (27%) were exclusively in critical care settings,<sup>27-30,32,41,43</sup> and the remaining 19  
35  
36 publications (73%) reported on treatment given either on general wards, both intensive care units  
37  
38 and general wards, or were not specified.<sup>3,23-26,31,33-40,42,44-47</sup>  
39  
40  
41  
42

43 A total of 21 studies reported the IV preparation site. Of those studies, 12 publications  
44  
45 (57%) reported preparation on the nursing ward<sup>3,23,26,29-32,35,41,45,46</sup> and 7 (33%) reported use of  
46  
47 central pharmacies.<sup>24,25,27,33,34,38,39,42</sup> Two studies (10%) compared rates of IAPEs in the nursing  
48  
49 ward and a central pharmacy.<sup>28,47</sup>  
50  
51

52 Of the 26 publications, 17 (65%) included >1 type of IV therapy.<sup>3,23,24,26,28-30,33,35,37,41-  
53  
54 44,46,47</sup> Five studies (19%) evaluated only chemotherapy,<sup>25,34,36,39,45</sup> three studies (12%) reported  
55  
56  
57  
58  
59  
60

1  
2  
3 only parenteral nutrition or IV lipid emulsions,<sup>27,32,38,40</sup> and one study (4%) only evaluated  
4 antibiotic (cefepime) preparation errors.<sup>31</sup>  
5  
6  
7

8  
9 While IAPes were not consistently linked to individual patient outcomes in the studies  
10 surveyed, nearly half of the studies attempted to assess the potential for patient impact in some  
11 way. Twelve (46%) of the publications included in this review reported on the severity of harm  
12 or potential for harm arising from identified IAPes (see **online supplementary Table S2**),  
13  
14  
15  
16  
17  
18  
19  
20  
21  
22  
23  
24  
25  
26  
27  
28  
29  
30  
31  
32  
33  
34  
35  
36  
37  
38  
39  
40  
41  
42  
43  
44  
45  
46  
47  
48  
49  
50  
51  
52  
53  
54  
55  
56  
57  
58  
59  
60

While IAPes were not consistently linked to individual patient outcomes in the studies surveyed, nearly half of the studies attempted to assess the potential for patient impact in some way. Twelve (46%) of the publications included in this review reported on the severity of harm or potential for harm arising from identified IAPes (see **online supplementary Table S2**),<sup>3,24,27,29,30,37-39,42-44,46</sup> eight (67%) of which reported  $\geq 1$  errors to result in various degrees of harm,<sup>3,24,38,39,42-44,46</sup> and four (33%) having reported no errors to have resulted in adverse outcomes or to have presented a major patient risk.<sup>27,29,30,37</sup>

Of the 12 studies that reported on burden of harm, three (25%) used the NCC MERP medication error index<sup>48</sup> to score identified errors;<sup>29,37,38</sup> while six studies (50%) relied on clinician assessment or expert panel for determination of error severity.<sup>3,24,39,42-44</sup> Among the six studies which used clinician assessment or expert panel, two of the study teams (Niemann et al.<sup>44</sup> and Nguyen et al.<sup>43</sup>) assessed errors based on clinical relevance rather than assigning a score based on patient harm or potential for harm. The remaining three studies each took a different approach to estimating patient harm.<sup>27,30,46</sup> Ding and colleagues<sup>46</sup> were the only authors to record whether the error was associated with a drug found on the ISMP list of high-alert medications. Crill and colleagues<sup>27</sup> did not have a system for rating error severity, but did note that no contamination errors resulted in patient infections. Lastly, the 2008 study by Fahimi and colleagues<sup>30</sup> did not describe a specific system for rating error severity, but noted that none of the errors identified resulted in adverse events or major risks to patients.

### Categorization and incidence of IAPEs

Errors identified in the selected studies were grouped into four broad categories: component errors, dose/calculation errors, aseptic technique errors, and composite errors, as detailed in the Methods section. Errors of the same subtype were frequently defined slightly differently among studies; full descriptions of the error subtype definitions are shown in **online supplementary Table S3**. Incidence values for error subtypes are presented in **Table 3**.

**Table 3. Summary of Reported IAPE Incidence by Error Subtype**

| Reference                                | Error incidence calculation  | Component Errors |                        |             | Dose / Calculation Errors |                     |                      | Aseptic Technique Errors             |                         |                           | Composite Errors      |                                 |
|------------------------------------------|------------------------------|------------------|------------------------|-------------|---------------------------|---------------------|----------------------|--------------------------------------|-------------------------|---------------------------|-----------------------|---------------------------------|
|                                          |                              | Wrong Drug       | Wrong Diluent Solution | Wrong Label | Wrong Dose                | Wrong Concentration | Wrong Diluent Volume | General Inadequate Aseptic Technique | Bacterial Contamination | Failure to Disinfect Vial | Improper Hand Hygiene | Any Admixture or Labeling Error |
| <b>Anselmi et al. 2007<sup>23</sup></b>  | Numerator:                   | Site 1:          |                        |             | Site 1:                   |                     |                      |                                      |                         |                           |                       |                                 |
|                                          | errors (including            | 0/804            |                        |             | 8/804                     |                     |                      |                                      |                         |                           |                       |                                 |
|                                          | near-misses)                 | Site 2:          |                        |             | Site 2:                   |                     |                      |                                      |                         |                           |                       |                                 |
|                                          | Denominator:                 | 0/100            |                        |             | 2/100                     |                     |                      |                                      |                         |                           |                       |                                 |
|                                          | Doses prepared               | Site 3:          |                        |             | Site 3:                   |                     |                      |                                      |                         |                           |                       |                                 |
|                                          |                              | 1/487            |                        |             | 36/487                    |                     |                      |                                      |                         |                           |                       |                                 |
|                                          | <b>Incidence:</b>            | <b>0.00%</b>     |                        |             | <b>0.90%</b>              |                     |                      |                                      |                         |                           |                       | <b>8.48%</b>                    |
|                                          |                              | <b>0.20%</b>     |                        |             | <b>7.40%</b>              |                     |                      |                                      |                         |                           |                       |                                 |
| <b>Bertsche et al. 2008<sup>24</sup></b> | Numerator: events            |                  |                        |             |                           |                     |                      |                                      |                         |                           |                       |                                 |
|                                          | Denominator:                 |                  |                        |             |                           |                     |                      |                                      |                         |                           |                       |                                 |
|                                          | drug-handling processes      |                  |                        |             |                           |                     |                      | 218/315                              |                         |                           |                       |                                 |
|                                          | <b>Incidence:</b>            |                  |                        |             |                           |                     |                      | <b>69.20%</b>                        |                         |                           |                       |                                 |
| <b>Castagne et al. 2011<sup>25</sup></b> | Numerator:                   |                  |                        |             |                           |                     |                      |                                      |                         |                           |                       |                                 |
|                                          | errors (102 near-misses; 544 |                  |                        |             |                           |                     |                      | 646/7382                             |                         |                           |                       |                                 |

1  
2  
3  
4  
5  
6  
7  
8  
9  
10  
11  
12  
13  
14  
15  
16  
17  
18  
19  
20  
21  
22  
23  
24  
25  
26  
27  
28  
29  
30  
31  
32  
33  
34  
35  
36  
37  
38  
39  
40  
41  
42  
43  
44  
45  
46  
47  
48  
49

errors)

Denominator:

doses prepared

**Incidence:**

**8.80%**

Numerator:

UK:

UK:

UK:

errors (not

UK: 0/273

UK: 2/273

118/273

UK: 1/273

295/299

299/299

including near-

GER: 0/425

GER: 208/425

GER: 421/425

GER: 7/425

13 /798

GER: 245/425

GER: 403/425

misses)

0/425

FR: 18/100

421/425

7/425

total

245/425

403/425

Denominator:

FR: 0/100

FR: 18/100

FR: 20/100

FR: 5/100

FR: 4/100

FR: 9/100

doses prepared

**0.00%**

**1.00%**

**20.00%**

**1.00%**

**2.00%**

**4.00%**

**9.00%**

**Incidence:**

**0.00%**

**49.00%**

**99.00%**

**5.00%**

**99.00%**

**100.00%**

Numerator:

positive bacterial

cultures

3/90

3/90

Denominator:

syringes prepared

**Incidence:**

**3.30%**

**3.30%**

±5% deviation:

Numerator: errors

16/100

Denominator:

±10%

doses prepared

Deviation: 5/100

**Incidence:**

**5.00%–16.00%**

Numerator:

±5% deviation:

errors

53/100

Cousins et al.

2005<sup>26</sup>

Crill et al.

2010<sup>27\*</sup>

Dehmel et al.

2011<sup>28†</sup>

Dehmel et al.

2011<sup>28‡</sup>

1  
2  
3  
4  
5  
6  
7  
8  
9  
10  
11  
12  
13  
14  
15  
16  
17  
18  
19  
20  
21  
22  
23  
24  
25  
26  
27  
28  
29  
30  
31  
32  
33  
34  
35  
36  
37  
38  
39  
40  
41  
42  
43  
44  
45  
46  
47  
48  
49

Denominator: ±10% deviation:  
doses prepared 22/100  
**Incidence:** 22.00%–  
53.00%

Numerator:  
errors

**Ding et al.**  
2015<sup>46§</sup>

Denominator: 50/593  
TOE  
(ordered and  
unordered doses)

54/593

**Incidence:** 8.43%

9.10%

Numerator:  
errors (including  
near-misses)

**Fahimi et al.**  
2007<sup>29</sup>

Denominator: 2/43 4/43 14/43  
doses  
administered

**Incidence:** 4.65% 9.30% 32.60%

Numerator:  
errors (including  
near-misses)

**Fahimi et al.**  
2008<sup>30¶</sup>

Denominator: 49/524 38/524  
doses prepared

**Incidence:** 9.35% 7.25%

**Hoefel et al.**

Numerator: 14/99 6/99

For peer review only



1  
2  
3  
4  
5  
6  
7  
8  
9  
10  
11  
12  
13  
14  
15  
16  
17  
18  
19  
20  
21  
22  
23  
24  
25  
26  
27  
28  
29  
30  
31  
32  
33  
34  
35  
36  
37  
38  
39  
40  
41  
42  
43  
44  
45  
46  
47  
48  
49

For peer review only

|                      |                    |               |              |                   |
|----------------------|--------------------|---------------|--------------|-------------------|
| 2006 <sup>31</sup>   | errors             |               |              |                   |
|                      | Denominator:       |               |              |                   |
|                      | doses              |               |              |                   |
|                      | administered       |               |              |                   |
|                      | <b>Incidence:</b>  | <b>14.10%</b> | <b>6.10%</b> |                   |
|                      | Numerator:         |               |              |                   |
|                      | positive bacterial |               |              | Nursing ward:     |
|                      |                    |               |              | 1/92              |
| Khalili et al.       | cultures           |               |              | Central           |
| 2013 <sup>47</sup>   | Denominator:       |               |              | pharmacy: 0/17    |
|                      | doses prepared     |               |              |                   |
|                      | <b>Incidence:</b>  |               |              | <b>0.00–1.10%</b> |
|                      | Numerator:         |               |              |                   |
|                      | positive bacterial |               |              |                   |
|                      | cultures           |               |              | 1/51              |
| Macias et al.        | Denominator:       |               |              |                   |
| 2005 <sup>32</sup>   | doses prepared     |               |              |                   |
|                      | <b>Incidence:</b>  |               |              | <b>1.45%</b>      |
|                      | Numerator:         |               |              |                   |
|                      | errors             |               |              |                   |
| MacKay et al.        | Denominator:       |               |              | 0.66/1000         |
| 2009 <sup>33**</sup> | 1000 doses         |               |              |                   |
|                      | prepared           |               |              |                   |
|                      | <b>Incidence:</b>  |               |              | <b>0.07%</b>      |
| Masini et al.        | Numerator:         | 5% relative   |              |                   |
| 2014 <sup>34††</sup> | errors             | error: 1/333  |              |                   |

|                                     |                   |               |               |                    |               |                |
|-------------------------------------|-------------------|---------------|---------------|--------------------|---------------|----------------|
|                                     | Denominator:      |               |               | 10% relative       |               |                |
|                                     | doses prepared    |               |               | error: 4/333       |               |                |
|                                     | <b>Incidence:</b> |               |               | <b>0.30%–1.20%</b> |               |                |
|                                     | Numerator:        |               |               |                    |               |                |
|                                     | errors            | 8/            | 3/            | 857/               | 11/           | 2883/          |
| <b>Moniz et al.</b>                 | Denominator:      | 425,683       | 425,683       | 425,683            | 425,683       | 425,683        |
| <b>2014<sup>42,††</sup></b>         | doses prepared    |               |               |                    |               |                |
|                                     | <b>Incidence:</b> | <b>~0.00%</b> | <b>0.00%</b>  | <b>0.20%</b>       | <b>~0.00%</b> | <b>0.68%</b>   |
|                                     | Numerator:        |               |               |                    |               |                |
|                                     | errors (including |               |               |                    |               |                |
|                                     | near-misses)      | ICU:          |               | ICU:               |               | ICU: 159/236   |
|                                     | Denominator:      | 1/236         |               | 27/236             |               | PSU: 204/280   |
| <b>Nguyen et al.</b>                | TOE               | PSU:          |               | PSU:               |               |                |
| <b>2014<sup>43,§§</sup></b>         | (administered and | 1/280         |               | 17/280             |               |                |
|                                     | omitted doses)    |               |               |                    |               |                |
|                                     | <b>Incidence:</b> | <b>0.36%–</b> |               | <b>6.10%–</b>      |               | <b>67.3%–</b>  |
|                                     |                   | <b>0.42%</b>  |               | <b>11.40%</b>      |               | <b>72.90%</b>  |
|                                     | Numerator:        |               |               |                    |               |                |
|                                     | errors            |               |               | 115/               |               | 138/233        |
| <b>Niemann et al.</b>               | Denominator:      |               | 38/233        | 233                |               |                |
| <b>2014<sup>44</sup></b>            | drug-handling     |               |               |                    |               |                |
|                                     | processes         |               |               |                    |               |                |
|                                     | <b>Incidence:</b> |               | <b>16.00%</b> | <b>49.00%</b>      |               | <b>59.00%</b>  |
|                                     | Numerator:        |               |               |                    |               |                |
| <b>Ong et al. 2013<sup>35</sup></b> | errors (including | 1/349         | 1/349         | 11/349             | 61/349        | 307/349 81/349 |

1  
2  
3  
4  
5  
6  
7  
8  
9  
10  
11  
12  
13  
14  
15  
16  
17  
18  
19  
20  
21  
22  
23  
24  
25  
26  
27  
28  
29  
30  
31  
32  
33  
34  
35  
36  
37  
38  
39  
40  
41  
42  
43  
44  
45  
46  
47  
48  
49

near-misses)  
Denominator:  
doses  
administered

**Incidence:** 0.28% 0.28% 3.20% 17.50% 88.00% 23.20%

Numerator:  
errors

**Parshuram et al. 2006**<sup>36</sup>

Denominator: 24/78  
infusion bags  
prepared

**Incidence:** 31.00%

Numerator:  
errors (including  
near-misses)

**Rodriguez-Gonzalez et al. 2011**<sup>37</sup>

Denominator:  
TOE 8/402 32/402  
(observed  
administrations  
plus omitted  
doses)

**Incidence:** 1.99% 7.96%

Numerator:

**Sacks et al. 2009**<sup>38</sup>

errors 18/4730  
Denominator:  
doses prescribed

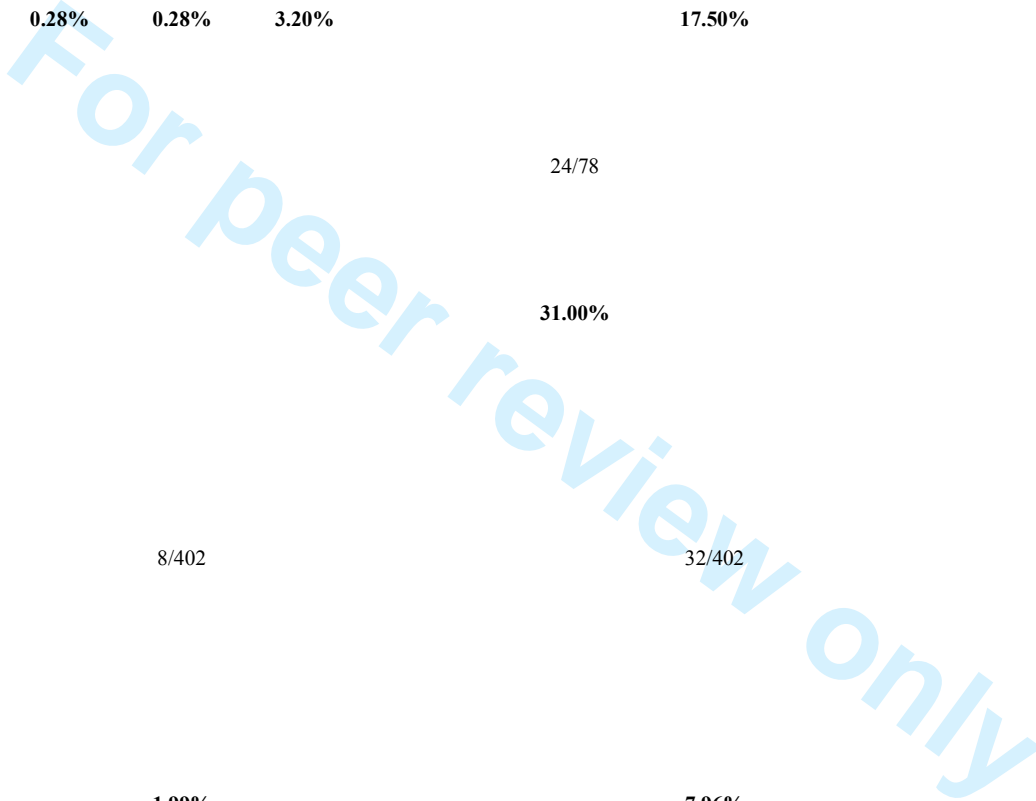

1  
2  
3  
4  
5  
6  
7  
8  
9  
10  
11  
12  
13  
14  
15  
16  
17  
18  
19  
20  
21  
22  
23  
24  
25  
26  
27  
28  
29  
30  
31  
32  
33  
34  
35  
36  
37  
38  
39  
40  
41  
42  
43  
44  
45  
46  
47  
48  
49

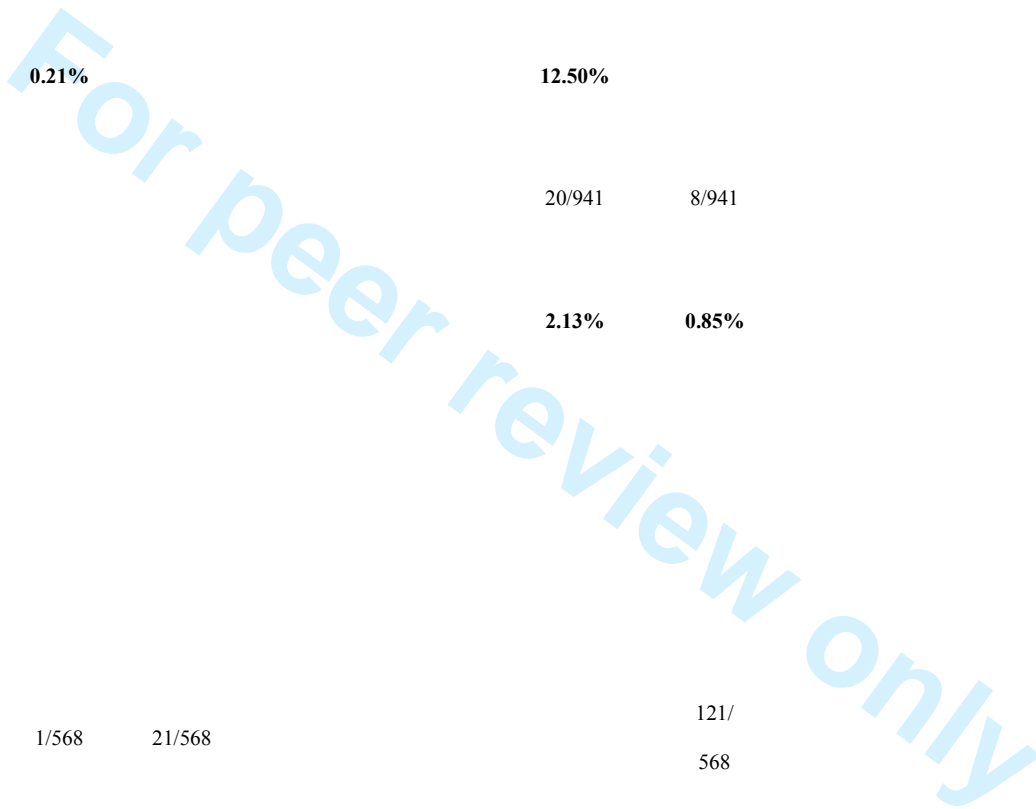

|                                              |                    |              |              |               |               |
|----------------------------------------------|--------------------|--------------|--------------|---------------|---------------|
|                                              | <b>Incidence</b>   |              |              |               | <b>0.38%</b>  |
|                                              | Numerator:         |              |              |               |               |
|                                              | errors             |              |              |               |               |
| <b>Seger et al.</b>                          | Denominator:       | 3/1421       |              | 23/184        |               |
| <b>2012<sup>39</sup>  </b>                   | doses prepared     |              |              |               |               |
|                                              | <b>Incidence:</b>  | <b>0.21%</b> |              | <b>12.50%</b> |               |
|                                              | Numerator:         |              |              |               |               |
|                                              | errors             |              |              |               |               |
| <b>Skouroliakou et al. 2005<sup>40</sup></b> | Denominator:       |              | 20/941       | 8/941         |               |
|                                              | solutions prepared |              |              |               |               |
|                                              | <b>Incidence:</b>  |              | <b>2.13%</b> | <b>0.85%</b>  |               |
|                                              | Numerator:         |              |              |               |               |
| <b>Tavakoli-Ardakani et al.</b>              | errors             |              |              |               | 2705/8322     |
| <b>2013<sup>45***</sup></b>                  | Denominator:       |              |              |               |               |
|                                              | TOE                |              |              |               |               |
|                                              | <b>Incidence:</b>  |              |              |               | <b>32.50%</b> |
|                                              | Numerator:         |              |              |               |               |
|                                              | errors (including  |              |              |               |               |
|                                              | near-misses)       |              |              | 121/          |               |
| <b>Westbrook et al.</b>                      | Denominator:       | 1/568        | 21/568       | 568           |               |
| <b>2011<sup>3</sup></b>                      | doses administered |              |              |               |               |
|                                              | <b>Incidence:</b>  | <b>0.18%</b> | <b>3.70%</b> | <b>21.30%</b> |               |
| <b>Wheeler et al.</b>                        | Numerator:         |              |              |               |               |
| <b>2008<sup>41</sup></b>                     | errors             |              | 88/149       |               |               |

Denominator:

syringes prepared

**Incidence:** **59.10%**

\* Crill et al. 2010<sup>27</sup>. Authors speculate that contamination arose during preparation, but note that it may also have occurred during or after administration.

† Dehmel et al. 2011<sup>28</sup>. Results presented for automated preparation in the centralized pharmacy.

‡ Dehmel et al. 2011<sup>28</sup>. Results presented for manual preparation in the nursing ward.

§ Ding et al. 2015<sup>46</sup>. Wrong dose error rate combines wrong dose, omission, and extra dose.

¶ Fahimi et al. 2008<sup>30</sup>. Wrong dose and wrong diluent volume were combined into one value in the original article.

|| Macias et al. 2005<sup>32</sup>. This study was designed to observe a sepsis outbreak. Only baseline (pre-outbreak) data are presented in this table.

\*\* MacKay et al. 2009<sup>33</sup>. This study tested automation as an intervention. Only baseline data is presented in this table.

†† Masini et al. 2014<sup>34</sup>. Results presented for manual preparation only.

‡‡ Moniz et al. 2014<sup>42</sup>. Wrong volume of drug/diluent (detectable by previous practices), wrong drug volume (not detectable by previous practices), and wrong diluent volume (not detectable by previous practices) are combined in this table as wrong dose.

§§ Nguyen et al. 2014<sup>43</sup>. This was an interventional study. Only baseline data is presented in this table.

¶¶ Rodriguez-Gonzalez et al. 2011<sup>37</sup>. Errors were defined as "wrong reconstitution (volume, fluid)", which is reported in this table as wrong diluent solution, and "wrong dilution (volume, fluid)", which is reported in this table as wrong diluent volume.

|| Seger et al. 2012<sup>39</sup>. Results presented for manual preparation only. Wrong dose and wrong diluent were reported as a combined value in the original article.

\*\*\* Tavakoli-Ardakani et al. 2013<sup>45</sup>. This study reported that additional data was collected by error subcategory; however, these data are not present in the available publication.

Unless otherwise noted, all data reported from interventional studies are from the baseline period only.

FR, France; GER, Germany; ICU, intensive care unit; PSU, post-surgical unit; TOE, total opportunities for error; UK, United Kingdom

1  
2  
3  
4 The error subtype of wrong drug selection was infrequent, with the highest reported rate  
5 of 4.7% of total doses.<sup>3,26,29,35</sup> Selection of a wrong diluent solution was reported to have  
6 occurred in 7 of 26 publications (27%), with results varying across studies (~0% to  
7  
8 49.0%).<sup>3,26,30,35,37,42,44</sup> Of note, the multicenter, multinational study by Cousins et al.<sup>26</sup> reported  
9 that 1.0% to 49.0% of doses administered had been prepared with an incorrect diluent across all  
10 study sites. This range is wider than that of the other included studies (0% to 16.0%).<sup>26</sup> Labeling  
11 errors were reported in four publications (15%), with reported incidence varying substantially,  
12 ranging from 3.2% to 99.0% (20.0 to 99.0% within the Cousins et al. study<sup>27</sup> alone).<sup>26,29,35,41</sup>  
13  
14  
15  
16  
17  
18  
19  
20  
21  
22

23 Eight publications (31%) captured incidence of wrong dose, and while most of these  
24 studies reported incidence below 10%,<sup>23,26,30,42,46</sup> one study did report an incidence over 32%.<sup>29</sup>  
25 Wrong drug concentration errors were reported in six publications (23%), with error incidence  
26 per total number of IV doses prepared ranging from 0.3% to 53.0%.<sup>25,28,34,36,39,40</sup> While some  
27 studies defined a concentration error based on a threshold 5% deviation between the prepared  
28 dose and the ideal dose,<sup>28,34,39</sup> the Castagne study used a higher threshold of 20%.<sup>25</sup>  
29  
30  
31  
32  
33  
34  
35  
36  
37

38 Seven studies (27%) reported errors pertaining to wrong diluent volume,<sup>3,17,31,35,37,40,44</sup>  
39 with most studies (four) explicitly defining this error subgroup as any deviation from  
40 manufacturer or accepted institutional guidelines for IV preparation.<sup>3,35,37,44</sup> The highest reported  
41 error rate (49.0%) was identified by Niemann and colleagues,<sup>44</sup> while the lowest reported  
42 incidence (0.9%) was from the Skouroliahou et al. study,<sup>36</sup> although this study reported errors  
43 pertaining to overall IV solution volume as opposed to diluent volume alone.  
44  
45  
46  
47  
48  
49  
50  
51  
52  
53  
54  
55  
56  
57  
58  
59  
60

1  
2  
3  
4  
5  
6  
7  
8  
9  
10  
11  
12  
13  
14  
15  
16  
17  
18  
19  
20  
21  
22  
23  
24  
25  
26  
27  
28  
29  
30  
31  
32  
33  
34  
35  
36  
37  
38  
39  
40  
41  
42  
43  
44  
45  
46  
47  
48  
49  
50  
51  
52  
53  
54  
55  
56  
57  
58  
59  
60

Reported challenges with aseptic technique included general aseptic technique deviations, bacterial contamination, failure to disinfect the vial, and improper hand hygiene. In studies that reported general inadequate aseptic technique deviations, two studies reported incidence below 5% (range: 0% to 3.3%)<sup>24,27,42</sup>; however, the study by Bertsche and colleagues<sup>24</sup> reported an incidence of just under 70%. The variation in incidence presented may be the result of differences in error definitions, as Bertsche and colleagues assessed aseptic technique deviations as any procedural deviation from local hygiene guidelines.<sup>24</sup> The other studies defined aseptic technique errors either based on bacterial cultures<sup>27,32</sup> or report of syringes left uncapped during the preparation process.<sup>42</sup>

Bacterial contamination errors were reported in three studies, with all reporting incidence under 5% (**Table 3**).<sup>27,32,47</sup> Two additional studies report error incidence for both failure to disinfect the vial and improper hand hygiene.<sup>26,35</sup> In particular, the study by Cousins and colleagues<sup>26</sup> presents a wide range of incidence across aseptic technique subtypes (**Table 3**). The Cousins et al. study<sup>26</sup> presented data from three separate institutions located in France, Germany, and the UK, with incidence of aseptic technique errors from the French institution found to be dramatically lower (4.0% for vial disinfection and 9.0% for hand washing). Of note, the authors attribute this difference to the French institution having undergone a recent update to their aseptic preparation methods protocol due to a prior outbreak of Legionnaire's disease within the facility.<sup>26</sup>

Eight (31%) studies reported an overall incidence of IAPes that combined multiple error subtypes.<sup>23,33,38,42-46</sup> These studies have diverse error definitions and error detection methods; thus, the error incidence ranges widely (0.07% to 72.9%).

## DISCUSSION

This systematic review found that IAPEs are ubiquitous across countries and hospital locations, and that the types of errors observed and reported are diverse. Reported error incidence was found to vary widely not only between settings (central pharmacies or nursing wards) but also within these settings across studies. Variability in error detection methods and definitions applied may contribute to the variation in error rates reported across studies.

This review identified studies conducted in Europe, North and South America, and Asia. While different regions, countries, and even individual institutions are likely to have somewhat different standards and practices for IV admixture preparation, differences in methods and terms applied for data collection did not seem to vary any greater between countries than within a single country. In theory, variation among institutions within the same country has the potential to be larger than variation among countries, as local practices may be more flexible than nationally adopted standards. This highlights an important need for international consensus on defining and identifying IAPEs to fully understand the global patient burden.

There was some evidence for the effect of location and method of IV admixture preparation on the incidence of errors. In particular, error rates appear to be lower when IV preparation takes place in central pharmacy settings compared with nursing wards, and lower with automated versus manual preparation. Among studies meeting the inclusion criteria for this systematic review, only Dehmel and colleagues<sup>28</sup> and Khalili et al<sup>47</sup> directly compared error rates identified from a central pharmacy to those from a nursing ward using consistent IAPE definitions across settings. The Dehmel et al. study reported a markedly higher rate of wrong concentration errors using manual preparation in a nursing ward when compared with automated preparation in a central pharmacy (53% vs 16%, respectively).<sup>28</sup> Khalili and colleagues reported



1  
2  
3 a low rate of bacterial contamination (1.1%) in admixtures prepared on nursing wards, with no  
4 instances of contamination in admixtures prepared in central pharmacies, despite use of manual  
5 preparation techniques in each setting.<sup>47</sup> Caution should be taken in generalizing this finding,  
6 given the limited sample size of 17 preparations in the central pharmacy and 97 on the nursing  
7 ward.<sup>47</sup> Thus, while it appears that central pharmacies and automated technologies may reduce  
8 IAPes, further empirical studies are required to substantiate this hypothesis.  
9  
10  
11  
12  
13  
14  
15  
16  
17

18 In the present systematic review of IAPes, a patchwork of data emerged from the  
19 relevant available literature, in part because no single study design or observational technique is  
20 ideal for capturing all the aspects of IV admixture preparation that could result in an error. The  
21 majority of studies relied on direct observation of the IV admixture preparation process by a  
22 trained observer, while other studies used bacterial culture, measurement of the final admixture  
23 concentration, incident reports, and cross-checking against a checklist, computed calculation, or  
24 other benchmarks. However, certain error subtypes naturally lent themselves to a specific  
25 observational technique, such as bacterial culture for assessing bacterial contamination,  
26 laboratory testing for concentration errors, and direct observation for aseptic technique  
27 deviations.  
28  
29  
30  
31  
32  
33  
34  
35  
36  
37  
38  
39  
40  
41

42 The framework used for categorizing IAPes in this review was developed to facilitate the  
43 aggregation of data collected across studies. While inconsistency across reported error  
44 definitions precluded additional quantitative aggregation, we hope the classification system used  
45 herein is informative to researchers designing future studies, and may help to facilitate more  
46 effective standardization of error reporting going forward.  
47  
48  
49  
50  
51  
52  
53  
54

55 Within IAPe subtypes, the method of error calculation varied in some cases, which  
56 impacted the ability to generalize results across studies. The majority of studies reported the  
57  
58  
59  
60

1  
2  
3 incidence as errors per doses prescribed, prepared, or administered. However, four (15%) studies  
4 reported errors per total opportunities for error<sup>37,43,45,46</sup> and two (8%) studies reported errors per  
5 total drug-handling processes.<sup>24,44</sup> While using total opportunities for error or drug-handling  
6 processes may be insightful for those wishing to understand and optimize the IV medication use  
7 cycle from the user perspective, errors per dose may be a more useful measurement for  
8 researchers interested in patient impact and outcomes.  
9

10  
11  
12  
13  
14  
15  
16  
17  
18 Error definitions were also variable within some error subtypes. For instance, thresholds  
19 for determining concentration errors ranged from  $\pm 5\%$  variance from the label specification to as  
20 high as  $\pm 20\%$  variance.<sup>25,28,34,36,39,40</sup> Studies reporting IAPE incidence based on a composite of  
21 IAPE subtypes were often composed of common elements (eg, wrong drug, wrong  
22 concentration), but were sufficiently different that they could not be directly compared. This  
23 finding exposes a need for a standardized taxonomy of error subtypes that can be used across a  
24 variety of research settings and countries to facilitate meaningful comparisons.  
25  
26  
27  
28  
29  
30  
31  
32  
33  
34

35  
36 Other factors that may impact error incidence are circumstances, such as either a recent  
37 training or sentinel event as described by Cousins et al.,<sup>26</sup> when commenting on proportionally  
38 lower aseptic technique deviations observed in the French study site. It was suggested that this  
39 finding may be attributed to recent staff training and updated guidelines in the French institution  
40 included in the study, prompted by a recent outbreak of Legionnaire's disease at that site. This  
41 highlights the impact of staff training not only as a source of potential regional or institutional  
42 error variation, but also as a means of reducing error rates. Given the short duration of time  
43 between staff training and study implementation, the long-term sustainability of error reduction  
44 potentially gained by staff training in the Cousins et al. study was unclear.  
45  
46  
47  
48  
49  
50  
51  
52  
53  
54  
55  
56  
57  
58  
59  
60

1  
2  
3 In addition to heterogeneous error incidence results, the articles captured in this  
4  
5 systematic review used a variety of approaches to measuring the potential burden of patient  
6  
7 harm. Several studies used the existing NCC MERP error index<sup>48</sup> to rate and score errors, and the  
8  
9 majority of other studies relied upon either local clinician opinion or expert panel. As a result,  
10  
11 there is a high degree of variability in terms of how the errors are scored and how potential for  
12  
13 patient risk is attributed.  
14  
15

16  
17  
18 Of the 26 studies included in this review, 12 (46%) provided estimates or general  
19  
20 assessments for potentially attributable patient harm or clinical relevance for IAPEs,<sup>3,24,27,29,30,37-</sup>  
21  
22 <sup>39,42-44,46</sup>. Effective and standardized traceability measures are required to link a defect in the  
23  
24 admixture process that occurs early within the medication use cycle with later negative patient  
25  
26 outcomes. Given the separation in time and physical location between admixture preparation and  
27  
28 potential patient physical adverse response, it can be challenging to link potential negative  
29  
30 patient outcomes to the admixture/compounding process where unrecognized potential errors  
31  
32 may exist.<sup>11</sup> There is a need for robust study designs that allow for the assessment of the  
33  
34 association between specific errors incidences and patient outcomes.  
35  
36  
37  
38  
39

40  
41 Several limitations were present in this systematic review. Our search strategy targeted  
42  
43 the broad medical literature, but inclusion of additional databases, such as the Cumulative Index  
44  
45 of Nursing and Allied Health Literature may have added nursing specialist publications relevant  
46  
47 to this topic. While the quality of publications was generally fair, only five studies (19%) were  
48  
49 deemed to be of good quality in terms of methodology and reporting.<sup>27,32,36,43,44</sup> Further, the  
50  
51 Hawker method of quality ascertainment is generic, and may not be best suited to capturing the  
52  
53 unique challenges of this research topic. Drawing comparisons between the studies remains  
54  
55 difficult due to substantial variations in error definitions. As a result, meta-analysis of the current  
56  
57  
58  
59  
60

1  
2  
3 IAPE literature was not considered appropriate. Lastly, in the majority of studies, documentation  
4  
5 of error severity and associated burden of harm was not sufficient to allow for a thorough  
6  
7 evaluation of the impact on patient care or the consequences for healthcare facilities.  
8  
9

## 14 CONCLUSIONS

17 This systematic review is the first to categorize IAPes according to the characteristics of the  
18 error and the location and method of IV preparation. It is our hope that future studies may use  
19 these categorizations to provide a meaningful framework to assess IAPes within their procedural  
20 context. With improved standardization of IAPE definitions, grouping error subtypes as we have  
21 done may facilitate an improved understanding of where errors happen within the IV preparation  
22 process and devising solutions to help eradicate them. There is a clear potential burden of harm  
23 for patients resulting from IAPes, and thus a need to continue to optimize the IV preparation  
24 process, focusing on improving preparation facilities, designing and implementing preventive  
25 strategies, staff training, and implementing process standardization where possible. Future  
26 research should focus on the development of consistent error subtype definitions and a  
27 standardized reporting methodology as well as reliable and reproducible methods to track and  
28 link risk factors and the burden of harm associated with these errors.  
29  
30  
31  
32  
33  
34  
35  
36  
37  
38  
39  
40  
41  
42  
43  
44  
45  
46  
47  
48  
49  
50  
51  
52  
53  
54  
55  
56  
57  
58  
59  
60

## Acknowledgements

The authors would like to thank Diane Nitzki-George and Denise Hefley of DNG Consulting for their assistance rendered in this study. Editorial assistance was provided by Oxford PharmaGenesis Inc. and was funded by Baxter Healthcare Corporation.

## Data Sharing Statement

As the research presented is a systematic literature review of published data, no additional unpublished data are available.

## Funding

This study was sponsored by Baxter Healthcare Corporation.

## Contributors

NH: Concept/design, data analysis/interpretation, critical revision of article, approval of article.

IB: Data interpretation, critical revision of article, approval of article.

T H-T: Concept/Design, data interpretation, critical revision of article, approval of article.

PT: Concept/design, data interpretation, critical revision of article, approval of article.

## Competing Interests

NH is a former employee and stockholder of Baxter Healthcare Corporation.

IB is an employee and stockholder of Baxter Healthcare Corporation.

T H-T has no relevant competing interests to disclose.

PT is currently under contract to perform other work for Baxter Healthcare Corporation that is unrelated to the current manuscript.

## REFERENCES

1. Leape LL, Brennan TA, Laird N *et al*. The nature of adverse events in hospitalized patients. Results of the Harvard Medical Practice Study II. *N Engl J Med* 1991;324:377-84.
2. Phillips J, Beam S, Brinker A *et al*. Retrospective analysis of mortalities associated with medication errors. *Am J Health Syst Pharm* 2001;58:1835-41.
3. Westbrook JI, Rob MI, Woods A, Parry D. Errors in the administration of intravenous medications in hospital and the role of correct procedures and nurse experience. *BMJ Qual Saf* 2011;20:1027-34.
4. ISMPC. Managing overfill during preparation and delivery of intravenous medications. *Institute for Safe Medication Practices Canada Safety Bulletin* 2013;13:[www.ispm-canada.org/ISMPCSafetyBulletins.htm](http://www.ispm-canada.org/ISMPCSafetyBulletins.htm).
5. Flynn EA, Pearson RE, Barker KN. Observational study of accuracy in compounding i.v. admixtures at five hospitals. *Am J Health Syst Pharm* 1997;54:904-12.
6. The Council: Moving into the second Decade "Developing Recommendations and Offering Tools". The National Coordinating Council for Medication Error Reporting and Prevention; 2010.
7. Speth SL, Fields DB, Schlemmer CB, Harrison C. Optimizing i.v. workflow. *Am J Health Syst Pharm* 2013;70:2076, 2078-2080.
8. Leape LL, Bates DW, Cullen DJ *et al*. Systems analysis of adverse drug events. ADE Prevention Study Group. *JAMA* 1995;274:35-43.
9. Bates DW, Boyle DL, Vander Vliet MB, Schneider J, Leape L. Relationship between medication errors and adverse drug events. *J Gen Intern Med* 1995;10:199-205.
10. Walsh KE, Dodd KS, Seetharaman K *et al*. Medication errors among adults and children with cancer in the outpatient setting. *J Clin Oncol* 2009;27:891-6.
11. White R, Cassano-Piche A, Fields A, Cheng R, Easty A. Intravenous chemotherapy preparation errors: patient safety risks identified in a pan-Canadian exploratory study. *J Oncol Pharm Pract* 2014;20:40-6.
12. Walsh KE, Kaushal R, Chessare JB. How to avoid paediatric medication errors: a user's guide to the literature. *Arch Dis Child* 2005;90:698-702.
13. Bertoglio S, Rezzo R, Merlo FD *et al*. Pre-filled normal saline syringes to reduce totally implantable venous access device-associated bloodstream infection: a single institution pilot study. *J Hosp Infect* 2013;84:85-88.
14. Macias AE, Huertas M, de Leon SP *et al*. Contamination of intravenous fluids: a continuing cause of hospital bacteremia. *Am J Infect Control* 2010;38:217-221.
15. ISMP List of High-Alert Medications in Acute Care Settings: Institute for Safe Medication Practice, 2014. Available from: <https://www.ismp.org/tools/institutionalhighAlert.asp> (Accessed 19 August 2016).
16. NCC MERP Index for Categorizing Medication Errors: National Coordinating Council for Medication Error Reporting and Prevention, 2001. Available from: <http://www.nccmerp.org/sites/default/files/indexBW2001-06-12.pdf> (Accessed 19 August 2016).
17. Cousins DH, Gerrett D, Warner B. A review of medication incidents reported to the National Reporting and Learning System in England and Wales over 6 years (2005-2010). *Br J Clin Pharmacol* 2012;74:597-604.

18. Abbasinazari M, Zareh-Toranposhti S, Hassani A *et al*. The effect of information provision on reduction of errors in intravenous drug preparation and administration by nurses in ICU and surgical wards. *Acta Med Iran* 2012;50:771-7.
19. Chua SS, Tea MH, Rahman MH. An observational study of drug administration errors in a Malaysian hospital (study of drug administration errors). *J Clin Pharm Ther* 2009;34:215-23.
20. Prot S, Fontan JE, Alberti C *et al*. Drug administration errors and their determinants in pediatric in-patients. *Int J Qual Health Care* 2005;17:381-9.
21. Moher D, Liberati A, Tetzlaff J, Altman DG. Preferred reporting items for systematic reviews and meta-analyses: the PRISMA statement. *PLoS Med* 2009;6:e1000097.
22. Hawker S, Payne S, Kerr C, Hardey M, Powell J. Appraising the evidence: reviewing disparate data systematically. *Qual Health Res* 2002;12:1284-99.
23. Anselmi ML, Peduzzi M, Dos Santos CB. Errors in the administration of intravenous medication in Brazilian hospitals. *J Clin Nurs* 2007;16:1839-47.
24. Bertsche T, Niemann D, Mayer Y *et al*. Prioritising the prevention of medication handling errors. *Pharm World Sci* 2008;30:907-15.
25. Castagne V, Habert H, Abbara C, Rudant E, Bonhomme-Faivre L. Cytotoxics compounded sterile preparation control by HPLC during a 16-month assessment in a French university hospital: importance of the mixing bags step. *J Oncol Pharm Pract* 2011;17:191-6.
26. Cousins DH, Sabatier B, Begue D, Schmitt C, Hoppe-Tichy T. Medication errors in intravenous drug preparation and administration: a multicentre audit in the UK, Germany and France. *Qual Saf Health Care* 2005;14:190-5.
27. Crill CM, Hak EB, Robinson LA, Helms RA. Evaluation of microbial contamination associated with different preparation methods for neonatal intravenous fat emulsion infusion. *Am J Health Syst Pharm* 2010;67:914-8.
28. Dehmel C, Braune SA, Kreymann G *et al*. Do centrally pre-prepared solutions achieve more reliable drug concentrations than solutions prepared on the ward? *Intensive Care Med* 2011;37:1311-6.
29. Fahimi F, Sistanizad M, Abrishami R, Baniyasi S. An observational study of errors related to the preparation and administration of medications given by infusion devices in a teaching hospital. *Iran J Pharm Res* 2007;6:295-299.
30. Fahimi F, Ariapanah P, Faizi M *et al*. Errors in preparation and administration of intravenous medications in the intensive care unit of a teaching hospital: an observational study. *Aust Crit Care* 2008;21:110-6.
31. Hoefel HH, Lautert L. Errors committed by nursing technicians and assistants in administering antibiotics. *Am J Infect Control* 2006;34:437-42.
32. Macias AE, Munoz JM, Galvan A *et al*. Nosocomial bacteremia in neonates related to poor standards of care. *Pediatr Infect Dis J* 2005;24:713-6.
33. Mackay MW, Cash J, Farr F *et al*. Improving Pediatric Outcomes through Intravenous and Oral Medication Standardization. *J Pediatr Pharmacol Ther* 2009;14:226-35.
34. Masini C, Nanni O, Antaridi S *et al*. Automated preparation of chemotherapy: quality improvement and economic sustainability. *Am J Health Syst Pharm* 2014;71:579-85.
35. Ong WM, Subasyini S. Medication errors in intravenous drug preparation and administration. *Med J Malaysia* 2013;68:52-7.
36. Parshuram CS, Dupuis LL, To T *et al*. Occurrence and impact of unanticipated variation in intravenous methotrexate dosing. *Ann Pharmacother* 2006;40:805-11.
37. Rodriguez-Gonzalez CG, Herranz-Alonso A, Martin-Barbero ML *et al*. Prevalence of medication administration errors in two medical units with automated prescription and dispensing. *J Am Med Inform Assoc* 2012;19:72-8.

- 1  
2  
3  
4  
5  
6  
7  
8  
9  
10  
11  
12  
13  
14  
15  
16  
17  
18  
19  
20  
21  
22  
23  
24  
25  
26  
27  
28  
29  
30  
31  
32  
33  
34  
35  
36  
37  
38  
39  
40  
41  
42  
43  
44  
45  
46  
47  
48  
49  
50  
51  
52  
53  
54  
55  
56  
57  
58  
59  
60
38. Sacks GS, Rough S, Kudsk KA. Frequency and severity of harm of medication errors related to the parenteral nutrition process in a large university teaching hospital. *Pharmacotherapy* 2009;29:966-74.
39. Seger AC, Churchill WW, Keohane CA *et al*. Impact of robotic antineoplastic preparation on safety, workflow, and costs. *J Oncol Pract* 2012;8:344-9, 1 p following 349.
40. Skouroliakou M, Konstantinou D, Papasarantopoulos P, Matthaïou C. Computer assisted total parenteral nutrition for pre-term and sick term neonates. *Pharm World Sci* 2005;27:305-10.
41. Wheeler DW, Degnan BA, Sehmi JS *et al*. Variability in the concentrations of intravenous drug infusions prepared in a critical care unit. *Intensive Care Med* 2008;34:1441-7.
42. Moniz TT, Chu S, Tom C *et al*. Sterile product compounding using an i.v. compounding workflow management system at a pediatric hospital. *Am J Health Syst Pharm* 2014;71:1311-7.
43. Nguyen HT, Pham HT, Vo DK *et al*. The effect of a clinical pharmacist-led training programme on intravenous medication errors: a controlled before and after study. *BMJ Qual Saf* 2014;23:319-24.
44. Niemann D, Bertsche A, Meyrath D *et al*. A prospective three-step intervention study to prevent medication errors in drug handling in paediatric care. *J Clin Nurs* 2015;24:101-14.
45. Tavakoli-Ardakani M, Omidi S, Eshraghi A, J S. Medication errors in administration of chemotherapeutic agents: an observational study. *Iran J Pharm Sci* 2013;9:1-11.
46. Ding Q, Barker K, Flynn E *et al*. Incidence of intravenous medication errors in a chinese hospital. *Val Health Reg Issues* 2015;6C:33-39.
47. Khalili H, Sheikhabayi M, Samadi N *et al*. Bacterial Contamination of Single- and Multiple-Dose Vials after Multiple Use and Intravenous Admixtures in Three Different Hospitals in Iran. *Iran J Pharm Res* 2013;12:205-209.
48. National Coordinating Council for Medication Error Reporting and Prevention: Medication Error Index, 2015. Available from: <http://www.nccmerp.org/types-medication-errors> (Accessed December 17 2015).
49. Otero Lopez MJ, Castano Rodriguez B, Perez Encinas M *et al*. [Updated classification for medication errors by the Ruiz-Jarabo 2000 Group]. *Farm Hosp* 2008;32:38-52.



1  
2  
3  
4  
5  
6  
7  
8  
9  
10  
11  
12  
13  
14  
15  
16  
17  
18  
19  
20  
21  
22  
23  
24  
25  
26  
27  
28  
29  
30  
31  
32  
33  
34  
35  
36  
37  
38  
39  
40  
41  
42  
43  
44  
45  
46  
47  
48  
49  
50  
51  
52  
53  
54  
55  
56  
57  
58  
59  
60

**FIGURE TITLES AND LEGENDS**

**Figure 1. Intravenous Medication Use Cycle**

**Figure 2. PRISMA study inclusion flow diagram**

IV, intravenous; PRISMA, Preferred Reporting Items for Systematic Reviews and Meta-Analysis.

For peer review only

## ONLINE SUPPLEMENTARY TABLES

Table S1. Systematic Review Search Terms

| Errors                                                                                           | Route of Administration                                                    | Compounding                                                                                                                                                                                                                             | Article Type                                                                                                                                                                                                                                                                                                                                                                                                                                                                                                                                                                                                                                                                    |
|--------------------------------------------------------------------------------------------------|----------------------------------------------------------------------------|-----------------------------------------------------------------------------------------------------------------------------------------------------------------------------------------------------------------------------------------|---------------------------------------------------------------------------------------------------------------------------------------------------------------------------------------------------------------------------------------------------------------------------------------------------------------------------------------------------------------------------------------------------------------------------------------------------------------------------------------------------------------------------------------------------------------------------------------------------------------------------------------------------------------------------------|
| ([Medication* or drug* or pharmaceutical* or medical or infus*] adj5 error*).mp.                 | parenteral<br>OR<br>intravenous                                            | Compounding<br>OR<br>Compounded                                                                                                                                                                                                         | (clinical trial or randomized controlled trial or controlled clinical trial or multicenter study or phase 1 clinical trial or phase 2 clinical trial or phase 3 clinical trial or phase 4 clinical trial)<br>(EMBASE limits)                                                                                                                                                                                                                                                                                                                                                                                                                                                    |
| OR<br>(Adverse adj5 [event* or reaction*]).mp.                                                   | OR<br>catheter*<br>OR<br>infus*                                            | OR<br>Reconstitut*<br>OR<br>Admix*                                                                                                                                                                                                      | OR<br>(Evidence based medicine or consensus development or meta-analysis or outcomes research or "systematic review")<br>(EMBASE limits)                                                                                                                                                                                                                                                                                                                                                                                                                                                                                                                                        |
| OR<br>([Medication* or drug* or pharmaceutical*] adj5 [contamina* or safety or incompatib*]).mp. | OR<br>iv<br>OR<br>intraocular<br>OR<br>intravitreal<br>OR<br>intramuscular | OR<br>(Prepar* adj5 (pharmacy or pharmacies or pharmacist or pharmaceutical* or drug* or medication* or ward or wards or nurs* or chemotherapy* or antineoplastic* or cytostatic* or nutrition* or mixture* or solution* or compound or | OR<br>(Clinical trial, all or clinical trial, phase i or clinical trial, phase ii or clinical trial, phase iii or clinical trial, phase iv or clinical trial or comparative study or controlled clinical trial or meta-analysis or multicenter study or observational study or randomized controlled trial or systematic reviews)<br>(Medline limits)<br>OR<br>(Chart review* or observational or systematic or prospective or cohort or retrospective or controlled study or controlled studies or controlled trial* or cross sectional or evidence based or direct observation* or audit or audits or randomized or blind or blinded or case series).mp.<br>(free text terms) |
| OR<br>(Overdos* or over dose*).mp.                                                               | OR<br>intravitreal<br>OR<br>intramuscular                                  | OR<br>wards or nurs* or chemotherapy* or antineoplastic* or                                                                                                                                                                             | OR<br>(Medline limits)<br>OR<br>(Chart review* or observational or systematic or prospective or cohort or retrospective or controlled study or controlled studies or controlled trial* or cross sectional or evidence based or direct observation* or audit or audits or randomized or blind or blinded or case series).mp.                                                                                                                                                                                                                                                                                                                                                     |
| OR<br>(Near miss.mp. OR (incident or incidents or accident*).mp.                                 | OR<br>subcutaneous<br>OR                                                   | OR<br>cytostatic* or nutrition* or mixture* or solution* or compound or                                                                                                                                                                 | OR<br>(free text terms)                                                                                                                                                                                                                                                                                                                                                                                                                                                                                                                                                                                                                                                         |

1  
2  
3  
4  
5  
6  
7  
8  
9  
10  
11  
12  
13  
14  
15  
16  
17  
18  
19  
20  
21  
22  
23  
24  
25  
26  
27  
28  
29  
30  
31  
32  
33  
34  
35  
36  
37  
38  
39  
40  
41  
42  
43  
44  
45  
46  
47  
48  
49

---

OR                      epidural                      compounds)).mp.

(Steril\* or unsteril\* or                      OR

septic or sepsis or aseptic or                      intraosseous

asepsis).mp.                      OR

OR                      intraperitoneal

([Healthcare or health care                      OR

or hospital or bloodstream                      (ei or im or io or os or ip or

or blood stream or cross]                      iv or pa).fs. use emefd

adj3 infection\*).mp.

OR

patient safety.mp.

OR

([Drug or medication\* or

pharmaceutic\*] adj3

[stor\*or stability or stable

or instability or unstable or

expir\*).mp.

OR

([Wrong\* or incorrect\* or

inappropriate\* or error\* or

inaccura\* or deviation\*]

adj5 (dose\* or dosage\* or

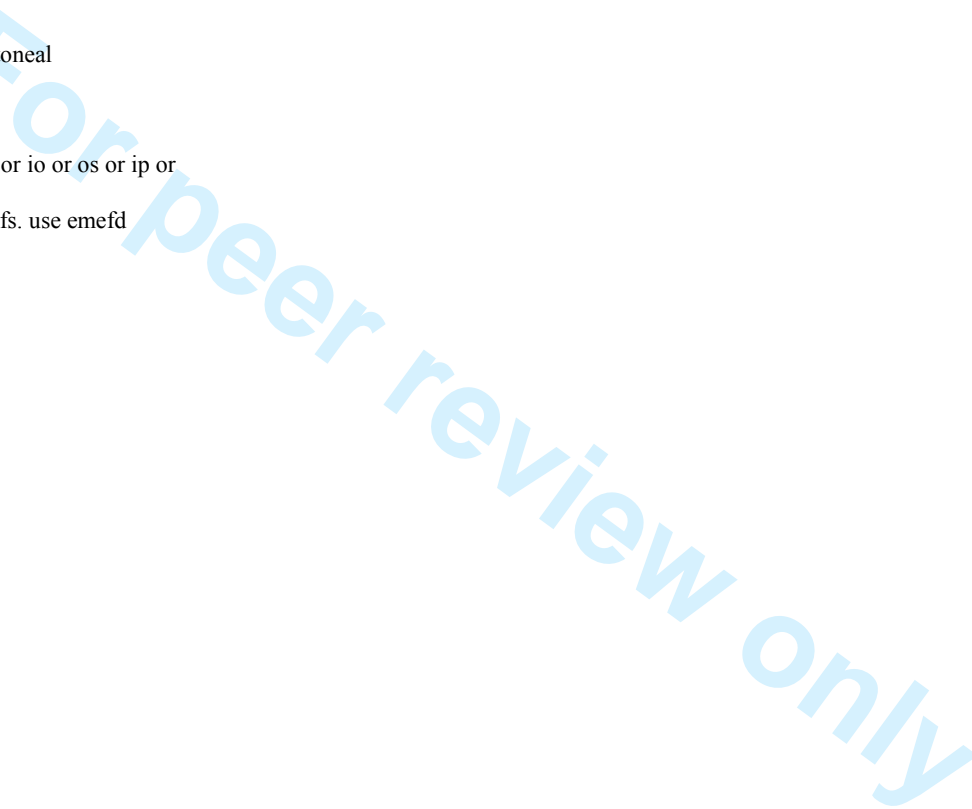

1  
2  
3 drug\* or medication\* or  
4  
5 pharmaceutical\* or  
6  
7 concentration\* or diluent\*  
8  
9 or dilution\* or strength\* or  
10  
11 calculat\* or volume or  
12  
13 label\* or product\* or  
14  
15 quantit\*).mp.  
16  
17 OR  
18  
19 (Missing label\* or "no  
20  
21 label\*" or "not label\*").mp.  
22  
23 OR  
24  
25  
26  
27  
28  
29  
30  
31  
32  
33  
34  
35  
36  
37  
38  
39  
40  
41  
42  
43  
44  
45  
46  
47  
48  
49

For peer review only

Table S2. Patient Burden of Harm

| Study                                                             | Error Types                                    | Burden of Harm                                                                                                                                                                                                                                                                                                                                                                                                                                                   |
|-------------------------------------------------------------------|------------------------------------------------|------------------------------------------------------------------------------------------------------------------------------------------------------------------------------------------------------------------------------------------------------------------------------------------------------------------------------------------------------------------------------------------------------------------------------------------------------------------|
| NCC MERP Medication Error Index Definition of Error Severity      |                                                |                                                                                                                                                                                                                                                                                                                                                                                                                                                                  |
| <b>Fahimi et al. 2007</b> <sup>29</sup>                           | Wrong drug<br>Wrong label<br>Wrong dose        | All observed errors were rated NCC MERP Index Category B ("An error occurred but the error did not reach the patient.")                                                                                                                                                                                                                                                                                                                                          |
| <b>Rodriguez-Gonzalez et al. 2011</b> <sup>37</sup>               | Wrong diluent solution<br>Wrong diluent volume | <ul style="list-style-type: none"> <li>Severity was defined according to updated medication errors taxonomy adapted from NCC MERP definitions.<sup>49</sup></li> <li>Severity of wrong preparation errors (reconstitution and dilution) were determined to have the potential to cause "no damage."</li> </ul>                                                                                                                                                   |
| <b>Sacks et al. 2009</b> <sup>38</sup>                            | Composite                                      | <p>Severity of errors was defined according to the NCC MERP Index:</p> <ul style="list-style-type: none"> <li>91% of errors did not cause harm (Categories B–D)</li> <li>15% of errors were "near misses" (Categories A–B)</li> <li>8% of errors contributed to or resulted in temporary harm (Categories E–F)</li> </ul> <p>No errors resulted in permanent harm, near-death, or death (Categories G–I)</p>                                                     |
| Clinician Assessment or Expert Panel Definition of Error Severity |                                                |                                                                                                                                                                                                                                                                                                                                                                                                                                                                  |
| <b>Bertsche et al. 2008</b> <sup>24</sup>                         | Inadequate aseptic technique                   | <ul style="list-style-type: none"> <li>A multidisciplinary committee for quality assurance established risk scores for medical errors.</li> <li>Errors were assigned a risk score weighted by potential risk of the drug involved and the characteristics of the error (low risk=0.5, moderate risk=1, high risk=2).</li> <li>Rates of error by severity were reported for all types of administration combined (IV, oral, and gastric tube), but not</li> </ul> |

Table S2. Patient Burden of Harm

| Study                                   | Error Types                  | Burden of Harm                                                                                                                                                                                |
|-----------------------------------------|------------------------------|-----------------------------------------------------------------------------------------------------------------------------------------------------------------------------------------------|
|                                         |                              | separately.                                                                                                                                                                                   |
| <b>Moniz et al. 2014<sup>42</sup></b>   | Wrong dose                   | A new workflow was implemented that detected IV preparation errors that would not have been detected previously. These                                                                        |
|                                         | Wrong drug                   | new errors (n = 447) were rated:                                                                                                                                                              |
|                                         | Wrong diluent solution       | <ul style="list-style-type: none"> <li>• Little potential for harm: 62.64%</li> </ul>                                                                                                         |
|                                         | Inadequate aseptic technique | <ul style="list-style-type: none"> <li>• Potential ADE with moderate harm: 32.66%</li> <li>• Potential ADE with severe harm: 4.70%</li> </ul>                                                 |
|                                         | Composite                    |                                                                                                                                                                                               |
| <b>Nguyen et al. 2014<sup>43</sup></b>  | Wrong drug                   | Clinical relevance of each dose with $\geq 1$ error was rated on a validated scale ranging from 0 (no harm) to 10 (death) by a panel of healthcare providers, and was categorized as follows: |
|                                         | Wrong dose                   | <ul style="list-style-type: none"> <li>• Minor outcome: 0–2</li> <li>• Moderate outcome: 3–7</li> </ul>                                                                                       |
|                                         | Composite                    | <ul style="list-style-type: none"> <li>• Severe outcome: 8–10</li> </ul>                                                                                                                      |
|                                         |                              | Moderate and severe outcomes were considered clinically relevant (57.9% to 64.0% of errors across the two study wards).                                                                       |
| <b>Niemann et al. 2014<sup>44</sup></b> | Wrong diluent solution       | Clinical relevance of error subcategories was rated by an expert panel on a four-point scale:                                                                                                 |
|                                         | Wrong diluent volume         | 1. No clinical relevance                                                                                                                                                                      |

1  
2  
3  
4  
5  
6  
7  
8  
9  
10  
11  
12  
13  
14  
15  
16  
17  
18  
19  
20  
21  
22  
23  
24  
25  
26  
27  
28  
29  
30  
31  
32  
33  
34  
35  
36  
37  
38  
39  
40  
41  
42  
43  
44  
45  
46  
47  
48  
49

Table S2. Patient Burden of Harm

| Study                                            | Error Types                                                                                                                              | Burden of Harm                                                                                                                                                                                                                                                                                                                                                                                            |
|--------------------------------------------------|------------------------------------------------------------------------------------------------------------------------------------------|-----------------------------------------------------------------------------------------------------------------------------------------------------------------------------------------------------------------------------------------------------------------------------------------------------------------------------------------------------------------------------------------------------------|
|                                                  | Composite                                                                                                                                | 2. Minor clinical relevance<br>3. Clinical relevance<br>4. High clinical relevance<br>The frequency of each level of severity combined oral and IV drug errors.                                                                                                                                                                                                                                           |
|                                                  | Seger et al. 2012 <sup>39</sup>                                                                                                          | Wrong drug <ul style="list-style-type: none"> <li>• Severity was rated as life-threatening, severe, significant, or little-to-no harm.</li> <li>• Events with potential for little-to-no harm were not included in the analysis.</li> <li>• There were no potentially life-threatening events, and the remaining events were approximately evenly distributed between significant and serious.</li> </ul> |
|                                                  |                                                                                                                                          | Wrong concentration <p>Doses with ±5% to 10% variance were considered to have little to no potential for harm. Those with variance &gt; ±10% were rated serious and potentially harmful.</p>                                                                                                                                                                                                              |
|                                                  | Westbrook et al. 2011 <sup>3</sup>                                                                                                       | Wrong drug <ul style="list-style-type: none"> <li>• Severity was rated on a scale from 1 ("Incident is likely to have little to no effect on the patient") to 5 ("Incident is likely to lead to death"), with ratings of 1 to 2 considered minor errors and 3 to 5 considered serious errors.</li> <li>• 25.5% of overall errors were rated as serious.</li> </ul>                                        |
|                                                  | Wrong diluent solution <ul style="list-style-type: none"> <li>• 23.8% of wrong diluent solution errors were rated as serious.</li> </ul> |                                                                                                                                                                                                                                                                                                                                                                                                           |
|                                                  | Wrong diluent volume <ul style="list-style-type: none"> <li>• 17.4% of wrong diluent volume errors were rated as serious.</li> </ul>     |                                                                                                                                                                                                                                                                                                                                                                                                           |
| Other Method for Determination of Error Severity |                                                                                                                                          |                                                                                                                                                                                                                                                                                                                                                                                                           |
| Crill et al. 2010 <sup>27</sup>                  | Inadequate aseptic technique                                                                                                             | <ul style="list-style-type: none"> <li>• Severity of errors was not rated.</li> <li>• Authors noted that no cases of systemic infection arose from syringes which had positive cultures.</li> </ul>                                                                                                                                                                                                       |
|                                                  | Bacterial contamination                                                                                                                  |                                                                                                                                                                                                                                                                                                                                                                                                           |

Table S2. Patient Burden of Harm

| Study                                   | Error Types            | Burden of Harm                                                                                                                                                                                                                                            |
|-----------------------------------------|------------------------|-----------------------------------------------------------------------------------------------------------------------------------------------------------------------------------------------------------------------------------------------------------|
| <b>Ding et al. 2015</b> <sup>46</sup>   | Wrong dose             | <ul style="list-style-type: none"> <li>• An error was considered clinically important if it concerned a drug listed in the ISMP list of high alert medications (2008).</li> <li>• 81% of TPN dose errors involved ISMP high alert medications.</li> </ul> |
|                                         | Composite              | An error was considered clinically important if it concerned a drug listed in the ISMP list of high alert medications (2008).                                                                                                                             |
| <b>Fahimi et al. 2008</b> <sup>30</sup> | Wrong diluent solution | There was no severity rating system, but the authors note that none of the errors identified resulted in adverse effects or major                                                                                                                         |
|                                         | Wrong dose             | risks to patients.                                                                                                                                                                                                                                        |

**ADE, adverse drug event; ISMP, Institute for Safe Medication Practices; IV, intravenous; NCC MERP, National Coordinating Council for Medication Error Reporting and**

**Prevention; TPN, total parenteral nutrition.**



1  
2  
3  
4  
5  
6  
7  
8  
9  
10  
11  
12  
13  
14  
15  
16  
17  
18  
19  
20  
21  
22  
23  
24  
25  
26  
27  
28  
29  
30  
31  
32  
33  
34  
35  
36  
37  
38  
39  
40  
41  
42  
43  
44  
45  
46  
47  
48  
49

**Table S3. Error Incidence Definitions**

| Admixture Preparation<br>and Labeling Error Types | Definitions                                                                                                                              | Study                             |
|---------------------------------------------------|------------------------------------------------------------------------------------------------------------------------------------------|-----------------------------------|
| <b>Component Error</b>                            |                                                                                                                                          |                                   |
|                                                   |                                                                                                                                          | Anselmi et al. 2007 <sup>23</sup> |
|                                                   |                                                                                                                                          | Cousins et al. 2005 <sup>26</sup> |
|                                                   |                                                                                                                                          | Moniz et al. 2014 <sup>42</sup>   |
|                                                   |                                                                                                                                          | Nguyen et al. 2014 <sup>43</sup>  |
| Wrong Drug                                        | An IV drug was prepared or administered that differed from the one that was prescribed                                                   | Ong et al. 2013 <sup>35</sup>     |
|                                                   |                                                                                                                                          | Seger et al. 2012 <sup>39</sup>   |
|                                                   |                                                                                                                                          | Westbrook et al.                  |
|                                                   |                                                                                                                                          | 2011 <sup>3</sup>                 |
|                                                   | An unauthorized IV drug was administered, or an order was changed, that was not found in the patient chart                               | Fahimi et al. 2007 <sup>29</sup>  |
|                                                   | An IV drug was prepared or administered with a diluent that was not compatible with drug and volume to achieve the correct concentration | Cousins et al. 2005 <sup>26</sup> |
|                                                   | An IV drug was prepared with the incorrect diluent based on any of the following:                                                        | Fahimi et al. 2008 <sup>30</sup>  |
| Wrong Diluent Solution                            | • The manufacturer's instructions                                                                                                        | Niemann et al. 2014 <sup>44</sup> |
|                                                   | • Published drug preparation handbooks                                                                                                   | Ong et al. 2013 <sup>35</sup>     |
|                                                   | • Other internal or external drug preparation guidelines                                                                                 | Westbrook et al.                  |
|                                                   |                                                                                                                                          | 2011 <sup>3</sup>                 |
|                                                   | An IV drug was prepared with the incorrect diluent                                                                                       | Moniz et al. 2014 <sup>42</sup>   |

|    |                                  |                                                                                                                              |                                    |
|----|----------------------------------|------------------------------------------------------------------------------------------------------------------------------|------------------------------------|
| 1  |                                  |                                                                                                                              |                                    |
| 2  |                                  |                                                                                                                              |                                    |
| 3  |                                  | The IV medication was reconstituted or diluted incorrectly according to medication errors taxonomy adapted from NCC          | Rodriguez-Gonzalez                 |
| 4  |                                  |                                                                                                                              |                                    |
| 5  |                                  | MERP definitions [Otero Lopez 2008]                                                                                          | et al. 2011 <sup>37</sup>          |
| 6  |                                  |                                                                                                                              |                                    |
| 7  |                                  | An IV drug was prepared or administered with a missing or incomplete label with respect to drug name, dose, patient          |                                    |
| 8  |                                  | name, or preparation time                                                                                                    | Cousins et al. 2005 <sup>26</sup>  |
| 9  |                                  |                                                                                                                              |                                    |
| 10 |                                  | The administration rate, patient identification, date, or time of infusion was not properly documented                       | Fahimi et al. 2007 <sup>29</sup>   |
| 11 | Wrong label                      | The IV drug label was incomplete with respect to patient, drug, dose, or preparation time, or the opened diluent vials       |                                    |
| 12 |                                  | were improperly labeled                                                                                                      | Ong et al. 2013 <sup>35</sup>      |
| 13 |                                  |                                                                                                                              |                                    |
| 14 |                                  | The syringe label was illegible or missing the drug name, dose, concentration, diluent, patient name, patient location,      |                                    |
| 15 |                                  | preparer's initials, countersigned, date, or time                                                                            | Wheeler et al. 2008 <sup>41</sup>  |
| 16 |                                  |                                                                                                                              |                                    |
| 17 |                                  |                                                                                                                              |                                    |
| 18 |                                  |                                                                                                                              |                                    |
| 19 | <b>Dose or Calculation Error</b> |                                                                                                                              |                                    |
| 20 |                                  |                                                                                                                              |                                    |
| 21 |                                  |                                                                                                                              | Anselmi et al. 2007 <sup>23</sup>  |
| 22 |                                  |                                                                                                                              |                                    |
| 23 |                                  |                                                                                                                              | Cousins et al. 2005 <sup>26</sup>  |
| 24 |                                  |                                                                                                                              |                                    |
| 25 |                                  | An incorrect IV drug dose or infusion volume was prepared or administered                                                    | Fahimi et al. 2007 <sup>29</sup>   |
| 26 |                                  |                                                                                                                              | Hoefel et al. 2006 <sup>31</sup>   |
| 27 |                                  |                                                                                                                              |                                    |
| 28 | Wrong Dose                       |                                                                                                                              | Moniz et al. 2014 <sup>42</sup>    |
| 29 |                                  |                                                                                                                              |                                    |
| 30 |                                  | An ingredient deviated $> \pm 10\%$ from the correct volume or concentration, a dose was omitted, or an extra dose was given | Ding et al. 2015 <sup>46</sup>     |
| 31 |                                  |                                                                                                                              |                                    |
| 32 |                                  | An IV drug that differed by $\pm 10\%$ of the prescribed dose was prepared                                                   | Nguyen et al. 2014 <sup>43</sup>   |
| 33 |                                  |                                                                                                                              |                                    |
| 34 |                                  | An incorrect dose or diluent volume was calculated that differed from the manufacturer's instructions or published drug      |                                    |
| 35 |                                  | preparation handbooks                                                                                                        | Fahimi et al. 2008 <sup>30</sup>   |
| 36 |                                  |                                                                                                                              |                                    |
| 37 |                                  | The sampled IV drug preparation deviated by $\pm 20\%$ or more from its intended concentration                               | Castagne et al. 2011 <sup>25</sup> |
| 38 | Wrong Concentration              |                                                                                                                              | Dehmel et al. 2011 <sup>28</sup>   |
| 39 |                                  |                                                                                                                              |                                    |
| 40 |                                  | The sampled IV drug preparation deviated by $\geq \pm 5\%$ or $\geq \pm 10\%$ from its intended concentration                | Masini et al. 2014 <sup>34</sup>   |
| 41 |                                  |                                                                                                                              |                                    |
| 42 |                                  |                                                                                                                              |                                    |
| 43 |                                  |                                                                                                                              |                                    |
| 44 |                                  |                                                                                                                              |                                    |
| 45 |                                  |                                                                                                                              |                                    |
| 46 |                                  |                                                                                                                              |                                    |
| 47 |                                  |                                                                                                                              |                                    |
| 48 |                                  |                                                                                                                              |                                    |
| 49 |                                  |                                                                                                                              |                                    |

|    |                                |                                                                                                                     |                                    |
|----|--------------------------------|---------------------------------------------------------------------------------------------------------------------|------------------------------------|
| 1  |                                |                                                                                                                     |                                    |
| 2  |                                |                                                                                                                     |                                    |
| 3  |                                |                                                                                                                     |                                    |
| 4  |                                | The sampled IV drug preparation deviated by $\pm 10\%$ or more from its intended concentration                      | Parshuram et al.                   |
| 5  |                                |                                                                                                                     | 2006 <sup>36</sup>                 |
| 6  |                                | The sampled IV drug preparation deviated by $\pm 5\%$ or more from its intended concentration                       |                                    |
| 7  |                                |                                                                                                                     | Seger et al. 2012 <sup>39</sup>    |
| 8  |                                |                                                                                                                     | Skouroliakou et al.                |
| 9  |                                | The concentration of any of the individual components of total parenteral nutrition was calculated incorrectly      |                                    |
| 10 |                                |                                                                                                                     | 2005 <sup>40</sup>                 |
| 11 |                                |                                                                                                                     |                                    |
| 12 |                                |                                                                                                                     | Cousins et al. 2005 <sup>26</sup>  |
| 13 |                                | An incorrect diluent volume was used                                                                                |                                    |
| 14 |                                |                                                                                                                     | Hoefel et al. 2006 <sup>31</sup>   |
| 15 |                                |                                                                                                                     |                                    |
| 16 |                                | An IV drug was prepared with an incorrect diluent volume based on any of the following:                             |                                    |
| 17 |                                |                                                                                                                     | Niemann et al. 2014 <sup>44</sup>  |
| 18 |                                | • The manufacturer's instructions                                                                                   |                                    |
| 19 |                                |                                                                                                                     | Ong et al. 2013 <sup>35</sup>      |
| 20 |                                | • The corresponding summaries of product characteristics                                                            |                                    |
| 21 | Wrong Diluent Volume           | • Published drug preparation handbooks                                                                              | Westbrook et al.                   |
| 22 |                                |                                                                                                                     | 2011 <sup>3</sup>                  |
| 23 |                                | • Other internal or external drug preparation guidelines                                                            |                                    |
| 24 |                                |                                                                                                                     |                                    |
| 25 |                                | The IV medication was reconstituted or diluted incorrectly according to medication errors taxonomy adapted from NCC | Rodriguez-Gonzalez                 |
| 26 |                                | MERP definitions [Otero Lopez 2008]                                                                                 | et al. 2011 <sup>37</sup>          |
| 27 |                                |                                                                                                                     |                                    |
| 28 |                                |                                                                                                                     | Skouroliakou et al.                |
| 29 |                                | The total volume of the IV solution was incorrect                                                                   |                                    |
| 30 |                                |                                                                                                                     | 2005 <sup>40</sup>                 |
| 31 |                                |                                                                                                                     |                                    |
| 32 | <b>Aseptic Technique Error</b> |                                                                                                                     |                                    |
| 33 |                                |                                                                                                                     |                                    |
| 34 | Inadequate Aseptic             | The IV drug was not prepared in accordance with local hygiene guidelines                                            | Bertsche et al. 2008 <sup>24</sup> |
| 35 | Technique                      | Sampling of repackaged syringes resulted in positive bacterial cultures                                             | Crill et al. 2010 <sup>27</sup>    |
| 36 |                                |                                                                                                                     |                                    |
| 37 |                                | Needles or syringes were left uncapped during IV preparation                                                        | Moniz et al. 2014 <sup>42</sup>    |
| 38 |                                |                                                                                                                     |                                    |
| 39 |                                |                                                                                                                     | Crill et al. 2010 <sup>27</sup>    |
| 40 | Bacterial Contamination        | Sampling of IV drug preparations resulted in positive bacterial cultures                                            |                                    |
| 41 |                                |                                                                                                                     | Khalili et al. 2013 <sup>47</sup>  |
| 42 |                                |                                                                                                                     |                                    |
| 43 |                                |                                                                                                                     |                                    |
| 44 |                                |                                                                                                                     |                                    |
| 45 |                                |                                                                                                                     |                                    |
| 46 |                                |                                                                                                                     |                                    |
| 47 |                                |                                                                                                                     |                                    |
| 48 |                                |                                                                                                                     |                                    |
| 49 |                                |                                                                                                                     |                                    |

|    |                           |                                                                                                                         |                                   |
|----|---------------------------|-------------------------------------------------------------------------------------------------------------------------|-----------------------------------|
| 1  |                           |                                                                                                                         |                                   |
| 2  |                           |                                                                                                                         |                                   |
| 3  |                           |                                                                                                                         | Macias et al. 2005 <sup>32</sup>  |
| 4  |                           |                                                                                                                         |                                   |
| 5  |                           |                                                                                                                         | Cousins et al. 2005 <sup>26</sup> |
| 6  | Failure to Disinfect Vial | Vial top was not swabbed with alcohol during preparation                                                                | Ong et al. 2013 <sup>35</sup>     |
| 7  |                           |                                                                                                                         |                                   |
| 8  |                           |                                                                                                                         | Cousins et al. 2005 <sup>26</sup> |
| 9  | Improper Hand Hygiene     | Hands were not washed, gloves were not worn, or non-sterile gloves were worn during IV drug preparation                 | Ong et al. 2013 <sup>35</sup>     |
| 10 |                           |                                                                                                                         |                                   |
| 11 | <b>Composite Error</b>    |                                                                                                                         |                                   |
| 12 |                           | An IV drug dose was prepared or administered differently from how it was prescribed by the physician in the patient's   |                                   |
| 13 |                           | medical record with regard to:                                                                                          |                                   |
| 14 |                           |                                                                                                                         |                                   |
| 15 |                           |                                                                                                                         |                                   |
| 16 |                           |                                                                                                                         |                                   |
| 17 |                           |                                                                                                                         |                                   |
| 18 |                           | • Wrong patient                                                                                                         | Anselmi et al. 2007 <sup>23</sup> |
| 19 |                           | • Wrong drug                                                                                                            |                                   |
| 20 |                           | • Wrong dose                                                                                                            |                                   |
| 21 |                           | • Omitted dose                                                                                                          |                                   |
| 22 |                           |                                                                                                                         |                                   |
| 23 |                           | Any of the following IV preparation or administration errors occurred:                                                  |                                   |
| 24 |                           |                                                                                                                         |                                   |
| 25 | Any Admixture or Labeling | • Unordered drug                                                                                                        |                                   |
| 26 |                           |                                                                                                                         |                                   |
| 27 | Error                     | • Omitted drug                                                                                                          |                                   |
| 28 |                           |                                                                                                                         | Ding et al. 2015 <sup>46</sup>    |
| 29 |                           | • Wrong dose                                                                                                            |                                   |
| 30 |                           | • Extra dose                                                                                                            |                                   |
| 31 |                           |                                                                                                                         |                                   |
| 32 |                           | • Wrong route of administration                                                                                         |                                   |
| 33 |                           |                                                                                                                         |                                   |
| 34 |                           | A drip compounding error of greater than one standard deviation from the calculated value for each component in         |                                   |
| 35 |                           | parenteral nutrition preparations occurred                                                                              | MacKay et al. 2009 <sup>33</sup>  |
| 36 |                           |                                                                                                                         |                                   |
| 37 |                           | IV drug preparations in the institution were prepared and verified using an IV workflow manager system. Doses that were |                                   |
| 38 |                           |                                                                                                                         | Moniz et al. 2014 <sup>42</sup>   |
| 39 |                           |                                                                                                                         |                                   |
| 40 |                           |                                                                                                                         |                                   |
| 41 |                           |                                                                                                                         |                                   |
| 42 |                           |                                                                                                                         |                                   |
| 43 |                           |                                                                                                                         |                                   |
| 44 |                           |                                                                                                                         |                                   |
| 45 |                           |                                                                                                                         |                                   |
| 46 |                           |                                                                                                                         |                                   |
| 47 |                           |                                                                                                                         |                                   |
| 48 |                           |                                                                                                                         |                                   |
| 49 |                           |                                                                                                                         |                                   |

1  
2  
3  
4  
5  
6  
7  
8  
9  
10  
11  
12  
13  
14  
15  
16  
17  
18  
19  
20  
21  
22  
23  
24  
25  
26  
27  
28  
29  
30  
31  
32  
33  
34  
35  
36  
37  
38  
39  
40  
41  
42  
43  
44  
45  
46  
47  
48  
49

reworked or rejected were retrospectively reviewed for errors in:

- Preparation
- Aseptic technique
- Documentation

Any IV of the following IV preparation or administration errors occurred:

- Wrong drug
- Wrong dose
- Wrong dosage form
- Deteriorated drug
- Wrong preparation technique
- Omission
- Unordered drug
- Wrong administration technique

Nguyen et al. 2014<sup>43</sup>

At least one deviation from internal or external drug preparation or administration guidelines, corresponding summaries of product characteristics, or manufacturer recommendations occurred during the drug handling processes (eg, preparation, storage, labeling)

Niemann et al. 2014<sup>44</sup>

Documented events in parenteral nutrition preparation or administration:

- Dose omission
- Extra dose
- Prescription or refill delayed
- Drug list incorrect
- Monitoring error

Sacks et al. 2009<sup>38</sup>

- Unauthorized drug
- Inadequate pain management
- Wrong events (eg, dose, drug, time, patient)

A deviation in handling, preparation, or administration of an IV drug occurred based on:

- The manufacturer's instructions
- Handbook on Injectable Drugs, 15th ed.
- Drug Information Handbook, 19th ed.
- American Society of Health-System Pharmacists Drug Information
- Oncology Nursing Drug Handbook

Tavakoli-Ardakani et  
al. 2013<sup>45</sup>

---

IV, intravenous; NCC MERP, National Coordinating Council for Medication Error Reporting and Prevention

1  
2  
3  
4  
5  
6  
7  
8  
9  
10  
11  
12  
13  
14  
15  
16  
17  
18  
19  
20  
21  
22  
23  
24  
25  
26  
27  
28  
29  
30  
31  
32  
33  
34  
35  
36  
37  
38  
39  
40  
41  
42  
43  
44  
45  
46  
47  
48  
49  
50  
51  
52  
53  
54  
55  
56  
57  
58  
59  
60

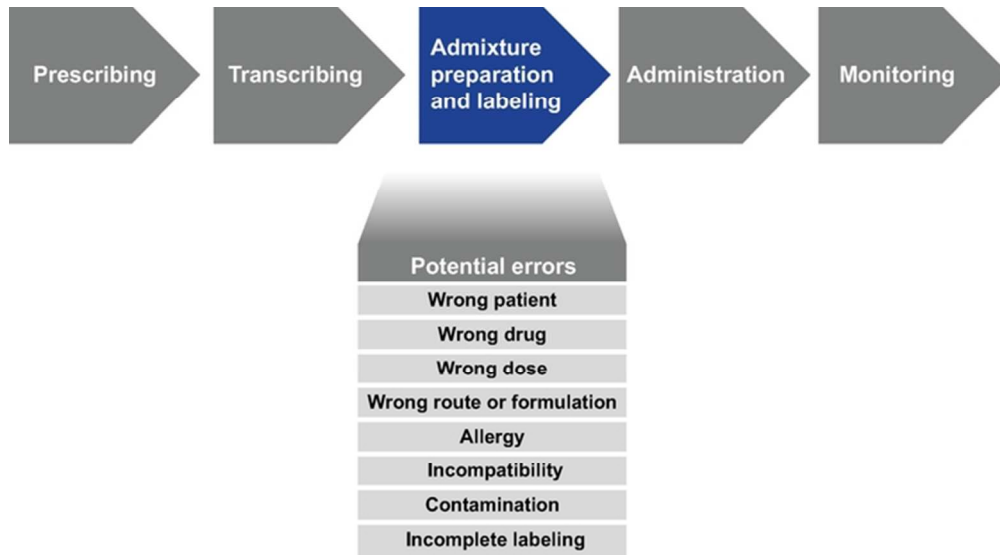

Figure 1 Color

60x33mm (300 x 300 DPI)

review only

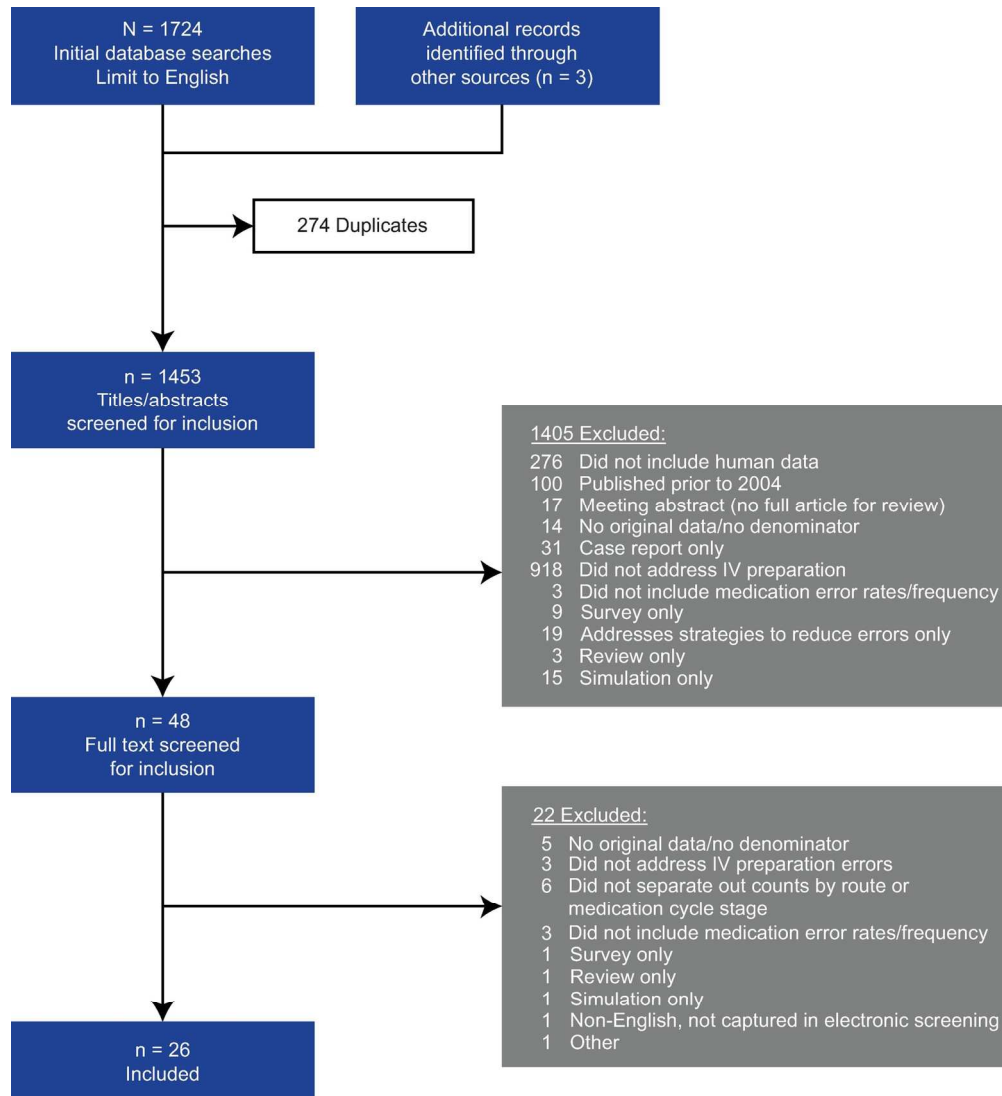

Figure 2 Color

156x171mm (300 x 300 DPI)

1  
2  
3  
4  
5  
6  
7  
8  
9  
10  
11  
12  
13  
14  
15  
16  
17  
18  
19  
20  
21  
22  
23  
24  
25  
26  
27  
28  
29  
30  
31  
32  
33  
34  
35  
36  
37  
38  
39  
40  
41  
42  
43  
44  
45  
46  
47  
48  
49  
50  
51  
52  
53  
54  
55  
56  
57  
58  
59  
60



1  
2  
3  
4  
5  
6  
7  
8  
9  
10  
11  
12  
13  
14  
15  
16  
17  
18  
19  
20  
21  
22  
23  
24  
25  
26  
27  
28  
29  
30  
31  
32  
33  
34  
35  
36  
37  
38  
39  
40  
41  
42  
43  
44  
45  
46  
47  
48  
49  
50  
51  
52  
53  
54  
55  
56  
57  
58  
59  
60

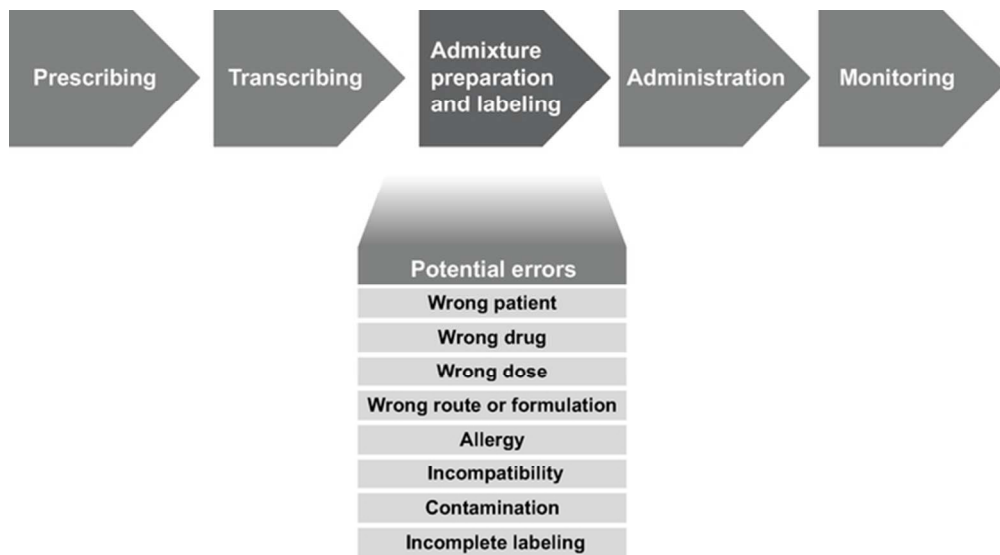

Figure 1 Mono

60x33mm (300 x 300 DPI)

review only

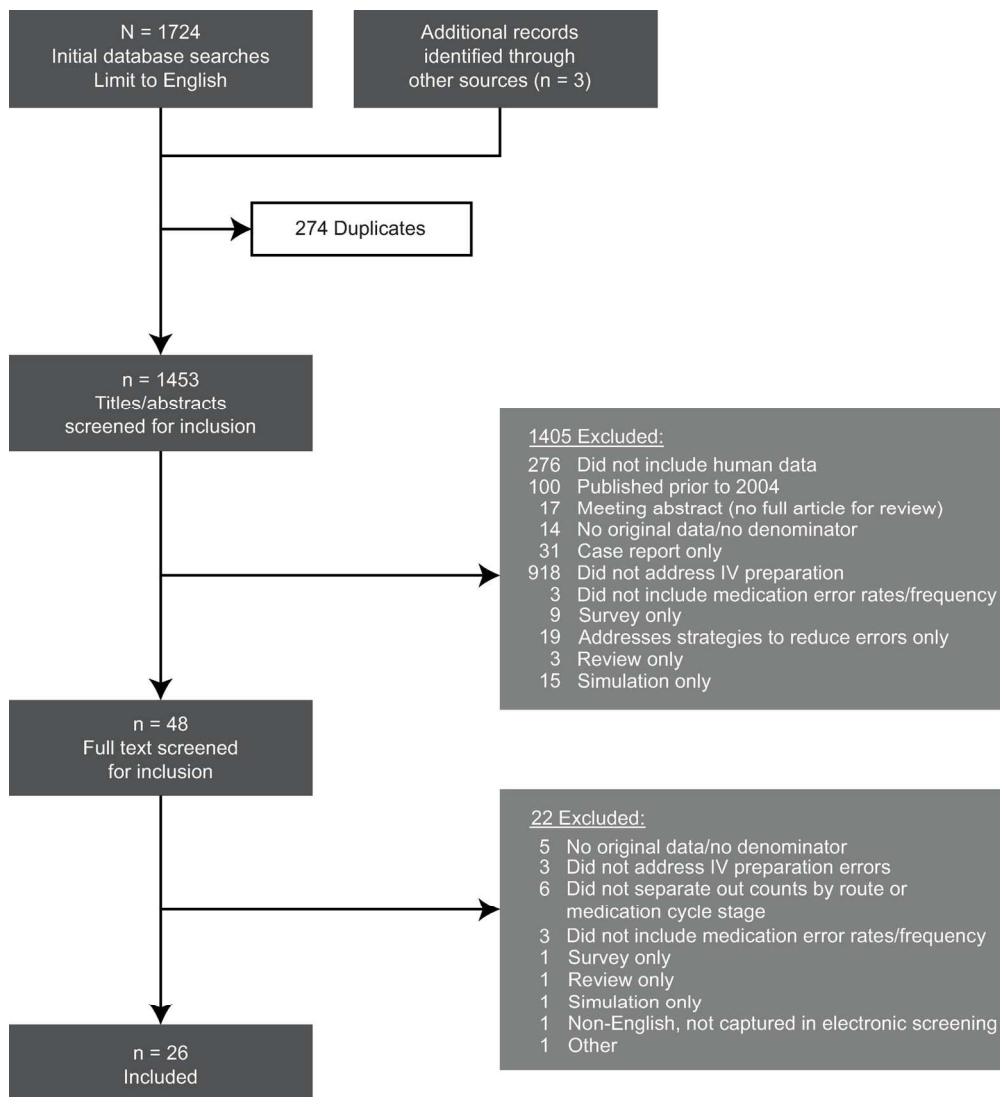

Figure 2 Mono

156x171mm (300 x 300 DPI)

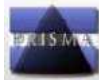

# PRISMA 2009 Checklist

1  
2  
3  
4  
5  
6  
7  
8  
9  
10  
11  
12  
13  
14  
15  
16  
17  
18  
19  
20  
21  
22  
23  
24  
25  
26  
27  
28  
29  
30  
31  
32  
33  
34  
35  
36  
37  
38  
39  
40  
41  
42  
43  
44  
45  
46  
47  
48  
49

| Section/topic                      | #  | Checklist item                                                                                                                                                                                                                                                                                              | Reported on page # |
|------------------------------------|----|-------------------------------------------------------------------------------------------------------------------------------------------------------------------------------------------------------------------------------------------------------------------------------------------------------------|--------------------|
| <b>TITLE</b>                       |    |                                                                                                                                                                                                                                                                                                             |                    |
| Title                              | 1  | Identify the report as a systematic review, meta-analysis, or both.                                                                                                                                                                                                                                         | 1                  |
| <b>ABSTRACT</b>                    |    |                                                                                                                                                                                                                                                                                                             |                    |
| Structured summary                 | 2  | Provide a structured summary including, as applicable: background; objectives; data sources; study eligibility criteria, participants, and interventions; study appraisal and synthesis methods; results; limitations; conclusions and implications of key findings; systematic review registration number. | 2                  |
| <b>INTRODUCTION</b>                |    |                                                                                                                                                                                                                                                                                                             |                    |
| Rationale                          | 3  | Describe the rationale for the review in the context of what is already known.                                                                                                                                                                                                                              | 4-5                |
| Objectives                         | 4  | Provide an explicit statement of questions being addressed with reference to participants, interventions, comparisons, outcomes, and study design (PICOS).                                                                                                                                                  | 5                  |
| <b>METHODS</b>                     |    |                                                                                                                                                                                                                                                                                                             |                    |
| Protocol and registration          | 5  | Indicate if a review protocol exists, if and where it can be accessed (e.g., Web address), and, if available, provide registration information including registration number.                                                                                                                               | 10                 |
| Eligibility criteria               | 6  | Specify study characteristics (e.g., PICOS, length of follow-up) and report characteristics (e.g., years considered, language, publication status) used as criteria for eligibility, giving rationale.                                                                                                      | 7                  |
| Information sources                | 7  | Describe all information sources (e.g., databases with dates of coverage, contact with study authors to identify additional studies) in the search and date last searched.                                                                                                                                  | 8                  |
| Search                             | 8  | Present full electronic search strategy for at least one database, including any limits used, such that it could be repeated.                                                                                                                                                                               | 40-42              |
| Study selection                    | 9  | State the process for selecting studies (i.e., screening, eligibility, included in systematic review, and, if applicable, included in the meta-analysis).                                                                                                                                                   | 7                  |
| Data collection process            | 10 | Describe method of data extraction from reports (e.g., piloted forms, independently, in duplicate) and any processes for obtaining and confirming data from investigators.                                                                                                                                  | 9-10               |
| Data items                         | 11 | List and define all variables for which data were sought (e.g., PICOS, funding sources) and any assumptions and simplifications made.                                                                                                                                                                       | 10                 |
| Risk of bias in individual studies | 12 | Describe methods used for assessing risk of bias of individual studies (including specification of whether this was done at the study or outcome level), and how this information is to be used in any data synthesis.                                                                                      | 10                 |
| Summary measures                   | 13 | State the principal summary measures (e.g., risk ratio, difference in means).                                                                                                                                                                                                                               | 10                 |
| Synthesis of results               | 14 | Describe the methods of handling data and combining results of studies, if done, including measures of consistency (e.g., $I^2$ for each meta-analysis).                                                                                                                                                    | n/a                |

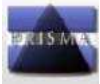

# PRISMA 2009 Checklist

Page 1 of 2

| Section/topic                 | #  | Checklist item                                                                                                                                                                                           | Reported on page # |
|-------------------------------|----|----------------------------------------------------------------------------------------------------------------------------------------------------------------------------------------------------------|--------------------|
| Risk of bias across studies   | 15 | Specify any assessment of risk of bias that may affect the cumulative evidence (e.g., publication bias, selective reporting within studies).                                                             | n/a                |
| Additional analyses           | 16 | Describe methods of additional analyses (e.g., sensitivity or subgroup analyses, meta-regression), if done, indicating which were pre-specified.                                                         | n/a                |
| <b>RESULTS</b>                |    |                                                                                                                                                                                                          |                    |
| Study selection               | 17 | Give numbers of studies screened, assessed for eligibility, and included in the review, with reasons for exclusions at each stage, ideally with a flow diagram.                                          | 11                 |
| Study characteristics         | 18 | For each study, present characteristics for which data were extracted (e.g., study size, PICOS, follow-up period) and provide the citations.                                                             | 12                 |
| Risk of bias within studies   | 19 | Present data on risk of bias of each study and, if available, any outcome level assessment (see item 12).                                                                                                | n/a                |
| Results of individual studies | 20 | For all outcomes considered (benefits or harms), present, for each study: (a) simple summary data for each intervention group (b) effect estimates and confidence intervals, ideally with a forest plot. | n/a                |
| Synthesis of results          | 21 | Present results of each meta-analysis done, including confidence intervals and measures of consistency.                                                                                                  | n/a                |
| Risk of bias across studies   | 22 | Present results of any assessment of risk of bias across studies (see Item 15).                                                                                                                          | n/a                |
| Additional analysis           | 23 | Give results of additional analyses, if done (e.g., sensitivity or subgroup analyses, meta-regression [see Item 16]).                                                                                    | n/a                |
| <b>DISCUSSION</b>             |    |                                                                                                                                                                                                          |                    |
| Summary of evidence           | 24 | Summarize the main findings including the strength of evidence for each main outcome; consider their relevance to key groups (e.g., healthcare providers, users, and policy makers).                     | 30                 |
| Limitations                   | 25 | Discuss limitations at study and outcome level (e.g., risk of bias), and at review-level (e.g., incomplete retrieval of identified research, reporting bias).                                            | 33                 |
| Conclusions                   | 26 | Provide a general interpretation of the results in the context of other evidence, and implications for future research.                                                                                  | 34                 |
| <b>FUNDING</b>                |    |                                                                                                                                                                                                          |                    |
| Funding                       | 27 | Describe sources of funding for the systematic review and other support (e.g., supply of data); role of funders for the systematic review.                                                               | 35                 |

From: Moher D, Liberati A, Tetzlaff J, Altman DG, The PRISMA Group (2009). Preferred Reporting Items for Systematic Reviews and Meta-Analyses: The PRISMA Statement. PLoS Med 6(6): e1000097. doi:10.1371/journal.pmed1000097

For more information, visit: [www.prisma-statement.org](http://www.prisma-statement.org).

Page 2 of 2

For peer review only - <http://bmjopen.bmj.com/site/about/guidelines.xhtml>

# BMJ Open

## Systematic evidence review of rates and burden of harm of intravenous admixture drug preparation errors in healthcare settings

|                                    |                                                                                                                                                                                                                                                                                                                                                                                                                                       |
|------------------------------------|---------------------------------------------------------------------------------------------------------------------------------------------------------------------------------------------------------------------------------------------------------------------------------------------------------------------------------------------------------------------------------------------------------------------------------------|
| Journal:                           | <i>BMJ Open</i>                                                                                                                                                                                                                                                                                                                                                                                                                       |
| Manuscript ID                      | bmjopen-2017-015912.R1                                                                                                                                                                                                                                                                                                                                                                                                                |
| Article Type:                      | Research                                                                                                                                                                                                                                                                                                                                                                                                                              |
| Date Submitted by the Author:      | 23-Jun-2017                                                                                                                                                                                                                                                                                                                                                                                                                           |
| Complete List of Authors:          | Hedlund, Nancy; Baxter International Inc, Global HEOR<br>Beer, Idal; Baxter Healthcare Corporation, Global Medical Affairs<br>Hoppe-Tichy, Torsten; University Hospital of Heidelberg , Pharmacy<br>Department and Cooperation Unit Clinical Pharmacy; Ruprecht-Karls-<br>University of Heidelberg,<br>Trbovich, Patricia; University of Toronto, Institute of Health Policy,<br>Medicine and Evaluation; North York General Hospital |
| <b>Primary Subject<br>Heading</b>: | Evidence based practice                                                                                                                                                                                                                                                                                                                                                                                                               |
| Secondary Subject Heading:         | Nursing                                                                                                                                                                                                                                                                                                                                                                                                                               |
| Keywords:                          | Medication Errors, Drug Compounding, Intravenous Admixture Preparation<br>Error, Systematic Review                                                                                                                                                                                                                                                                                                                                    |
|                                    |                                                                                                                                                                                                                                                                                                                                                                                                                                       |

SCHOLARONE™  
Manuscripts

1  
2  
3 **1 Systematic evidence review of rates and burden of harm of intravenous admixture drug**  
4  
5  
6 **2 preparation errors in healthcare settings**  
7

8  
9 3 Nancy Hedlund,<sup>1\*</sup> Idal Beer,<sup>2</sup> Torsten Hoppe-Tichy,<sup>3</sup> Patricia Trbovich<sup>4,5</sup>

10  
11  
12 4 *<sup>1</sup>Baxter Healthcare Corporation, Global Health Economics and Outcomes Research, Deerfield,*  
13  
14 5 *Illinois, United States*

15  
16  
17 6 *<sup>2</sup>Baxter Healthcare Corporation, Medical Affairs, Deerfield Illinois, United States*

18  
19  
20 7 *<sup>3</sup>University Hospital of Heidelberg, Pharmacy Department and Cooperation Unit Clinical*  
21  
22 8 *Pharmacy, Ruprecht-Karls-University of Heidelberg, Heidelberg, Germany*

23  
24  
25 9 *<sup>4</sup>Institute of Health Policy, Management and Evaluation, University of Toronto, Toronto,*  
26  
27 10 *Ontario, Canada*

28  
29  
30 11 *<sup>5</sup>North York General Hospital, Toronto, Ontario, Canada*

31  
32  
33  
34  
35 13 *\*Formerly of Baxter Healthcare Corporation, Deerfield Illinois, United States (During conduct*  
36  
37 14 *of the research)*

38  
39  
40  
41 **15 Corresponding author:**

42  
43 16 Idal Beer, MD, MBA, MPH

44  
45 17 Baxter Healthcare Corporation

46  
47 18 One Baxter Parkway

48  
49 19 Deerfield, IL, USA 60015

50  
51  
52 20 Telephone no.: 224-948-3336

53  
54  
55 21 E-mail address: idal\_beer@baxter.com

56  
57  
58 22

1  
2  
3 **1 ABSTRACT (300/300)**  
4

5  
6 **2 Objective:** To examine published evidence on intravenous (IV) admixture preparation errors  
7  
8  
9 **3** (IAPEs) in healthcare settings.

10  
11 **4 Methods:** Searches were conducted in 3 electronic databases (January 2005 to April 2017).  
12  
13  
14  
15  
16  
17  
18  
19  
20  
21  
22  
23  
24  
25  
26  
27  
28  
29  
30  
31  
32  
33  
34  
35  
36  
37  
38  
39  
40  
41  
42  
43  
44  
45  
46  
47  
48  
49  
50  
51  
52  
53  
54  
55  
56  
57  
58  
59  
60  
**5** Publications reporting rates of IAPEs and error types were reviewed and categorized into the  
**6** following groups: component errors, dose/calculation errors, aseptic technique errors, and  
**7** composite errors. The methodological rigor of each study was assessed using the Hawker  
**8** method.

**9 Results:** Of the 34 articles that met inclusion criteria, 28 reported the site of IAPEs: central  
**10** pharmacies (n = 8), nursing wards (n = 14), both settings (n = 4), and other sites (n = 3). Using  
**11** the Hawker criteria, 14% of the articles were of good quality, 74% were of fair quality, and 12%  
**12** were of poor quality. Error types and reported rates varied substantially, including wrong drug  
**13** (~0% to 4.7%), wrong diluent solution (0% to 49.0%), wrong label (0% to 99.0%), wrong dose  
**14** (0% to 32.6%), wrong concentration (0.3% to 88.6%), wrong diluent volume (0.06% to 49.0%),  
**15** and inadequate aseptic technique (0% to 92.7%). Four studies directly compared incidence by  
**16** preparation site and/or method, finding error incidence to be lower for doses prepared within a  
**17** central pharmacy versus the nursing ward, and lower for automated preparation versus manual  
**18** preparation. Although 8 studies (24%) reported  $\geq 1$  errors with the potential to cause patient  
**19** harm, no study directly linked IAPE occurrences to specific adverse patient outcomes.

**20 Conclusions:** The available data suggest a need to continue to optimize the IV preparation  
**21** process, focus on improving preparation workflow, design and implement preventive strategies,  
**22** train staff on optimal admixture protocols, and implement standardization. Future research  
**23** should focus on the development of consistent error subtype definitions, standardized reporting

1  
2  
3 1 methodology, and reliable, reproducible methods to track and link risk factors with the burden of  
4  
5  
6 2 harm associated with these errors.

7  
8 3

9  
10  
11 4 **Strengths and limitations of this study**

- 12  
13  
14  
15 5 • To the authors' knowledge, this is the first systematic review conducted that attempts to  
16  
17 6 categorize intravenous admixture preparation errors (IAPEs) according to both the  
18  
19 7 characteristics of the error and the location and method of intravenous (IV) preparation.  
20  
21  
22 8 • Although IAPE is a safety concern, its frequency, subtypes, and associated burden of  
23  
24 9 harm are not well understood; thus, the current review presented a thoughtful and valid  
25  
26 10 framework to assess IAPEs within their procedural context.  
27  
28  
29 11 • This review attempted to include all articles published in English between January 2005  
30  
31 12 and April 2017 that reported on IAPEs in which healthcare professionals prepared  $\geq 1$   
32  
33 13 dose of IV administered therapy.  
34  
35  
36 14 • This review is limited by the number of studies identified that reported data on the  
37  
38 15 frequency and/or burden of harm of IAPEs.  
39  
40  
41 16  
42  
43  
44 17  
45  
46  
47  
48  
49  
50  
51  
52  
53  
54  
55  
56  
57  
58  
59  
60



## 1 INTRODUCTION

2 Errors in medication preparation and administration can lead to patient harm.[1-3] For example,  
3 many preventable adverse events with respect to medication have been linked to errors in dosing  
4 (eg, patients receiving higher or lower amounts of medication than intended).[2, 4] The  
5 medication use cycle for an intravenous (IV) medication involves multiple steps prior to  
6 administration, including prescribing and transcription (paper-based orders), in addition to a  
7 number of admixture preparation and labeling steps (**Figure 1**).

### 8 **Figure 1. Intravenous medication use cycle**

9 An IV admixture preparation error (IAPE) can be considered as any deviation from the  
10 specifications involved in the admixture preparation and labeling process. An IAPE is a form of  
11 medication error—in other words, a preventable adverse event resulting from inappropriate  
12 medication preparation, administration, or use that can lead to patient harm, including death,  
13 while the medication is in the control of the healthcare professional, patient, or consumer.[5, 6]

14 IAPEs can be introduced at multiple points during admixture preparation and labeling.  
15 These steps can occur on site at a nursing ward or in a central or satellite pharmacy. IV  
16 medication doses are typically prepared (1) manually by nurses, either at the bedside or in a  
17 ward-based preparation room, (2) manually by pharmacists and pharmacy technicians in a  
18 central or satellite clean room under a laminar-airflow hood, or (3) through the use of pharmacy  
19 automation technology, which can be partially or fully automated and may be located in clean  
20 rooms or clean compartments within the machine. United States data suggest increasing use of  
21 automated technologies aimed at reducing IAPEs, for technologies ranging from robotic  
22 chemotherapy compounding devices (0.3% of hospitals) to barcode verification (20% of

1 hospitals), with higher levels of adoption predominantly within larger hospitals.[7] Delivery of  
2 the correct dose of an IV admixture to a patient depends on the careful control of many factors,  
3 such as the calculation of a patient-specific dose (eg, based on body weight or organ function),  
4 oversight of procedures utilized for admixture preparation, and labeling practices.[4, 8] While  
5 research suggests that the highest medication-error rates can be attributed to the prescribing and  
6 administration phases of the medication use cycle,[9-11] studies focused on medication  
7 preparation practices suggest that the IV admixture preparation and labeling phase pose a  
8 significant potential for errors.[9, 12-15] It is unknown what proportion of IAPEs are unreported.

9 In addition to measuring the incidence of IAPEs, it is also important to understand their  
10 impact in terms of burden of harm. Two examples of existing frameworks for categorizing  
11 patient harm resulting from medication errors are The Institute for Safe Medication Practices  
12 (ISMP) high-alert medication lists and The National Coordinating Council for Medication Error  
13 Reporting and Prevention (NCC MERP) Medication Error Index. ISMP publishes information  
14 and educational resources for healthcare providers on preventing medication errors, and tracks  
15 voluntary medication errors reports. Based on these voluntary error reports, ISMP maintains lists  
16 of high-alert medications in outpatient and inpatient settings that have the potential for increased  
17 risk of patient harm if used in error.[16] The NCC MERP Medication Error Index groups  
18 medication errors into nine possible categories, ranging from non-errors (situations in which  
19 errors may occur) to errors resulting in patient death.[17] These categories also include near-miss  
20 (near-hit) situations in which an error occurred but did not reach the patient or cause harm. ISMP  
21 uses the NCC MERP Medication Error Index in its medication error database.

22 Much of the prior published research focusing on the prescription or administration of IV  
23 therapies has failed to describe or distinguish between errors that arise as a result of the

1 admixture preparation process versus errors associated with incorrect prescribing or  
 2 administration.[18-21] With this systematic review, our objective is to identify the incidence of  
 3 IAPes (overall and by subtype) reported across institutional healthcare settings and to understand  
 4 the frequency of error subtypes and associated burden of patient harm attributable to IAPes as  
 5 reported in the published literature.

## 6

## 7 METHODS

### 8 Identification of literature and data sources

9 For the purposes of this review, an IAPE was defined as an error or deviation at any step within  
 10 the admixture preparation process where the drug container was physically handled or  
 11 manipulated by a healthcare professional. A broad search strategy was developed to identify all  
 12 studies (published from January 2005 to September 2015) that mention any type of IAPE in an  
 13 institutional healthcare setting, which included reports relating to wrong drug, wrong diluent  
 14 solution, wrong label, wrong dose, wrong concentration, wrong diluent volume, and inadequate  
 15 aseptic technique. Dose omission errors were considered to be errors related to administration  
 16 rather than preparation and, thus, were not included as a focus in this study. Near-miss and actual  
 17 errors (those that did reach patients) were both included. The review was structured based on the  
 18 PICOS (patients, intervention, comparator, outcomes, and study design) search strategy (**Table**  
 19 **1**).

---

**Table 1. PICOS Search Strategy**

---

|                        |                                                                                                                                                                                                                |
|------------------------|----------------------------------------------------------------------------------------------------------------------------------------------------------------------------------------------------------------|
| <b>Patient/Problem</b> | Incorrect preparation of IV admixtures within an institutional healthcare setting (acute or long-term care) by a licensed healthcare professional (nursing and/or pharmacy staff and/or physician) team member |
|------------------------|----------------------------------------------------------------------------------------------------------------------------------------------------------------------------------------------------------------|

---

|                     |                                                                                                                                                                                                                                                                                                                                                                                                                                                                                                               |
|---------------------|---------------------------------------------------------------------------------------------------------------------------------------------------------------------------------------------------------------------------------------------------------------------------------------------------------------------------------------------------------------------------------------------------------------------------------------------------------------------------------------------------------------|
| <b>Intervention</b> | Preparation of an IV admixture                                                                                                                                                                                                                                                                                                                                                                                                                                                                                |
| <b>Comparison</b>   | Automated versus manual preparation methods (studies were not required to demonstrate both)<br>Central pharmacy versus on-unit (on the nursing ward) preparation location (studies were not required to demonstrate both)                                                                                                                                                                                                                                                                                     |
| <b>Outcome</b>      | Incorrectly prepared or labeled IV admixture, which may or may not have reached a patient: <ul style="list-style-type: none"> <li>• Wrong drug or diluent</li> <li>• Wrong dose, concentration, or volume</li> <li>• Wrong, inaccurate, or omitted label</li> <li>• Contaminated admixture or failure to follow hygiene or sterility protocols</li> <li>• A combination of the above</li> </ul>                                                                                                               |
| <b>Study Types</b>  | <b>Inclusion criteria:</b> Observational studies for which numerator (number of doses impacted or number of errors) and denominator (number of eligible doses or opportunities for error) are discernible<br><b>Exclusion criteria:</b> Studies in which isolated contamination volumes are reported but for which total batch size is unknown fail to qualify for consideration<br>Error report logs for which number of errors is known but associated number of prepared doses is not also fail to qualify |

1 IV, intravenous; PICOS, patients, intervention, comparator, outcomes, and study design..

## 2 **Systematic review process**

3 Three electronic databases were searched for relevant literature reporting on IAPE: Ovid  
4 MEDLINE, EMBASE, and International Pharmaceutical Abstracts. The initial search was  
5 conducted on February 6, 2014, with supplementation on September 4, 2015 to include articles  
6 published during the interim. Aggregate results include articles published in English between  
7 January 2005 and April 2017 that involved studies in human subjects in which a healthcare  
8 professional prepared  $\geq 1$  doses of IV administered therapy (medication, including total  
9 parenteral nutrition). This date range was selected to include a sufficiently long period to capture  
10 the studies of interest, while remaining relevant to current practice in terms of technology and  
11 guidelines. Key search terms and limits used in the systematic review are shown in **online**  
12 **supplementary Table S1**. Screenings for relevant literature citations that appeared in the  
13 publications were made during the review process to identify any pertinent, additional  
14 publications up to April 2017. For this systematic review, references had to meet the

1 inclusion/exclusion criteria detailed in the next section. Duplicate articles were removed  
2 electronically prior to manual review. Titles of the papers and abstracts captured in the electronic  
3 search results were screened by 2 reviewers for relevancy according to prespecified criteria. If  
4 the titles did not provide sufficient information for screening, the abstract or full-text articles  
5 were then reviewed to discern whether the publication met inclusion criteria. All publications  
6 that met entry criteria for the review were obtained as full-text articles and then reassessed by the  
7 reviewers against the review criteria. The review process was fully compliant with the 2009  
8 Preferred Reporting Items for Systematic Reviews and Meta-Analyses (PRISMA)  
9 guidelines.[22]

## 10 **Inclusion and exclusion criteria**

11 Publications reporting on a randomized, controlled trial, prospective cohort study, observational  
12 quality audit, descriptive study, quasi-experimental study, or quality-improvement study were  
13 selected for inclusion. Quasi-experimental studies, quality-improvement studies, and descriptive  
14 studies were eligible if they included sufficient data on the number of doses prepared. While  
15 systematic reviews reporting on these study types were not included, their respective reference  
16 lists were reviewed to identify potentially relevant studies. Publications were not limited to a  
17 single geographic or physical study location and may have occurred in the hospital or any other  
18 institutional or outpatient healthcare setting associated with a hospital.

19 Publications and studies were included for review if they either reported incidence of  
20 IAPE or provided sufficient detail for incidence calculation. These errors included incorrectly  
21 dispensed medication as well as near-misses that were caught by the study observer prior to  
22 administration. Errors also had to originate with a healthcare professional (eg, nurse or  
23 pharmacist). Studies reporting patient or informal caregiver medication errors were not included.

1  
2  
3 1 To be included, studies were required to report original data on IAPes, including a denominator,  
4  
5  
6 2 to allow for incidence calculations.  
7

8  
9 3 Articles that described only errors in prescribing, transcription, administration, and  
10  
11 4 monitoring were not included. In addition to all articles that failed to meet the aforementioned  
12  
13 5 inclusion criteria, the following article types were also excluded: conference abstracts, case  
14  
15 6 reports, simulations, and survey findings.  
16  
17

### 18 19 7 **Data extraction**

20  
21  
22 8 The data extracted from relevant articles for analysis included year of publication, country of  
23  
24 9 origin, study period, patient population, definition of error, IV preparation location (eg, central or  
25  
26 10 satellite pharmacy or nursing ward), care setting (eg, critical care, general nursing ward), type of  
27  
28 11 therapy, method of error detection, and error incidence. Data were extracted and scored  
29  
30 12 independently by 2 separate reviewers, with introduction of a third reviewer in the case of  
31  
32 13 scoring discrepancies, with all differences being resolved by consensus. Each review team  
33  
34 14 included  $\geq 1$  pharmacist for professional knowledge and understanding of drug preparation. The  
35  
36 15 methodological rigor of each study was critically appraised and scored using the Hawker  
37  
38 16 method.[23] This appraisal tool is simple and particularly adaptable to literature reviews  
39  
40 17 encompassing varied research methodologies.[24] It employs 9 criteria to evaluate for each  
41  
42 18 study: 1) abstract and title; 2) introduction and aims; 3) method and data; 4) sampling; 5) data  
43  
44 19 analysis; 6) ethics and bias; 7) results; 8) transferability or generalizability; and 9) implications  
45  
46 20 and usefulness. For each criterion, studies were scored as: good (score 4), fair (score 3), poor  
47  
48 21 (score 2), or very poor (score 1). A mean score was then calculated for each study across all 9  
49  
50 22 criteria, and the overall quality of each study was likewise scored from good to very poor.  
51  
52  
53  
54  
55  
56  
57  
58  
59  
60

1  
2  
3 1 For the purposes of this review, IAPEs were grouped into 1 of 4 categories based on the  
4  
5 2 characteristics of the error and the location and method of IV preparation. Component errors  
6  
7 3 were defined as all those that result from selecting an incorrect ingredient (ie, wrong drug or  
8  
9 4 wrong diluent solution), or applying an incorrect, incomplete, or inaccurate label (ie, wrong  
10  
11 5 label) to the admixture. Dose/calculation errors were defined as those involving the use of an  
12  
13 6 incorrect calculation to determine dose and/or diluent amount, or the use of a diluent volume not  
14  
15 7 in accordance with the package insert (ie, wrong dose, wrong concentration, and wrong diluent  
16  
17 8 volume). Aseptic technique errors involved a breakdown in the process designed to minimize the  
18  
19 9 potential for antimicrobial contamination (ie, inadequate aseptic technique, bacterial  
20  
21 10 contamination, failure to disinfect vial, and improper hand hygiene). The category of composite  
22  
23 11 errors was used to describe IAPE rates reported in aggregate, in which the researchers reported  
24  
25 12 an overall rate that included multiple IAPE subtypes. Composite errors included cases in which  
26  
27 13 >1 error or type of error was observed in a single preparation.  
28  
29  
30  
31  
32  
33

34  
35 14 This study was registered with the PROSPERO international database of systematic  
36  
37 15 reviews (CRD42014010418) to comply with PRISMA guidelines.  
38  
39

## 40 16 **RESULTS**

41  
42  
43 17 Electronic database searches yielded 2018 English language publications for review. Additional  
44  
45 18 sources (hand searches of publication reference lists) identified another 3 publications for  
46  
47 19 evaluation. After removing duplicates and screening for inclusion and exclusion criteria, 34  
48  
49 20 articles were included in the final synthesis (**Figure 2**).[3, 25-57] Of the 34 articles, 5 (15%)  
50  
51 21 were rated good quality,[30, 34, 38, 45, 46] 25 (74%) were fair quality,[3, 25-29, 31-33, 36, 37,  
52  
53 22 39-41, 43, 44, 48, 51-57] and 4 (12%) were poor quality[35, 42, 49, 50] after assessment using  
54  
55 23 the Hawker method. The quality of 1 study (3%) could not be fully scored due to a missing data  
56  
57  
58  
59  
60

1  
2  
3 1 table in the available publication.[47] Details of the Hawker analysis for each study are shown in  
4  
5  
6 2 online **supplementary Table S2**.

7  
8  
9 3 **Figure 2. PRISMA study inclusion flow diagram**

10  
11  
12 4 **Study characteristics**

13  
14  
15 5 A summary of the study characteristics, in terms of the setting and methodology,  
16  
17 6 described in the 34 publications is presented in **Table 2**. Collectively, the publications reported  
18  
19 7 international data, with studies spanning Africa, North America, South America, Europe, the  
20  
21 8 Eastern Mediterranean region, and the Western Pacific region. Patient populations varied across  
22  
23 9 studies, with both adults and children represented. Studies were conducted mainly in general  
24  
25 10 inpatient or critical care settings, with several in pediatric or hematology units. The majority of  
26  
27 11 publications (21 [62%]) assessed errors in >1 type of IV therapy. Additional individual details  
28  
29 12 for each study are shown in online **supplementary Table S3**.

30  
31  
32  
33  
34 13

35  
36  
37 14

38  
39  
40 15



**Table 2. Summary of study characteristics**

| Study Setting Characteristics           | n (%)   | Study Methodology Characteristics                      | n (%)   | IV Admixture Preparation Characteristics    | n (%)   |
|-----------------------------------------|---------|--------------------------------------------------------|---------|---------------------------------------------|---------|
| <b>Geographical region</b>              |         | <b>Study design</b>                                    |         | <b>Location of IV admixture preparation</b> |         |
| Europe                                  | 13 (38) | Single arm                                             | 21 (62) | Nursing ward                                | 13 (38) |
| Americas                                | 10 (29) | Interventional                                         | 8 (24)  | Central pharmacy                            | 8 (24)  |
| Western Pacific                         | 6 (18)  | Comparative                                            | 5 (15)  | Not specified                               | 6 (18)  |
| Eastern Mediterranean                   | 4 (12)  |                                                        |         | Nursing ward and central pharmacy           | 4 (12)  |
| Africa                                  | 1 (3)   | <b>Observational technique</b>                         |         | Nursing ward and operating theater          | 1 (3)   |
|                                         |         | Direct observation                                     | 17 (50) | Offsite pharmacy                            | 1 (3)   |
| <b>Number of sites</b>                  |         | Analysis of final concentration                        | 5 (15)  | Obstetric theater                           | 1 (3)   |
| Single-center                           | 28 (82) | Bacterial culture                                      | 4 (12)  |                                             |         |
| 2 centers                               | 3 (9)   | Cross-checking                                         | 3 (9)   | <b>Method of IV admixture preparation</b>   |         |
| 3 or more centers                       | 3 (9)   | Incident report                                        | 3 (9)   | Manual                                      | 22 (68) |
|                                         |         | Chart review                                           | 1 (3)   | Automated                                   | 4 (12)  |
| <b>Patient population</b>               |         | Direct observation and analysis of final concentration | 1 (3)   | Manual vs automated                         | 4 (12)  |
| Not specified                           | 15 (44) |                                                        |         | Not specified                               | 3 (9)   |
| Pediatric patients                      | 10 (29) | <b>Measurement of patient impact</b>                   |         |                                             |         |
| Adult patients                          | 6 (18)  | Not measured                                           | 22 (65) | <b>Types of IV therapies</b>                |         |
| Adult and pediatric patients            | 3 (9)   | Clinician assessment or expert panel                   | 6 (18)  | Multiple                                    | 21 (62) |
|                                         |         | NCC MERP medication error index                        | 3 (9)   | Chemotherapy                                | 7 (21)  |
| <b>Care setting</b>                     |         | Other                                                  | 2 (6)   | Parenteral nutrition or IV lipid emulsion   | 3 (9)   |
| Critical care*                          | 9 (26)  | ISMP high-alert medication                             | 1 (3)   | Antibiotic                                  | 1 (3)   |
| General inpatient wards                 | 8 (24)  |                                                        |         | Morphine                                    | 1 (3)   |
| Pediatric units                         | 7 (20)  |                                                        |         | Phenylephrine                               | 1 (3)   |
| Oncology and/or hematology <sup>†</sup> | 6 (18)  |                                                        |         |                                             |         |
| General inpatient and critical care     | 3 (9)   |                                                        |         |                                             |         |
| Obstetrics                              | 1 (3)   |                                                        |         |                                             |         |

\*Includes intensive care, neonatal intensive care, post-surgical, and neurologic critical care

<sup>†</sup>Inpatient and/or outpatient

ISMP, Institute for Safe Medication Practices; IV, intravenous; NCC MERP, National Coordination Council for Medication Error Reporting.;

1  
2  
3 1 The most common method of detecting errors was direct observation, used in 17 studies  
4  
5 2 (50%),[3, 25, 26, 28, 31-33, 37, 41, 44-48, 52, 55] and 1 study used direct observation and  
6  
7 3 analysis of final IV admixture concentration.[53] Other methods included analysis of final  
8  
9 4 concentration in 5 studies (15%),[27, 30, 36, 38, 51] bacterial culture in 4 studies (12%),[29, 34,  
10  
11 5 49, 57] cross-checking in three studies (9%),[35, 42, 43] incident reports in 3 studies (9%),[40,  
12  
13 6 54, 56] and chart review in one study.[50] In several studies using the direct observation method,  
14  
15 7 nurses or pharmacists preparing the IV admixtures consented to participate but were not fully  
16  
17 8 aware of the study aims to avoid influencing their behavior.[18, 39, 45] Eight studies (24%)  
18  
19 9 reported on the accuracy of IV preparation before and after an intervention,[35, 36, 41-43, 45,  
20  
21 10 46, 52] 5 studies (15%) compared IV admixture preparation locations or methods,[30, 36, 41, 42,  
22  
23 11 49] and the remaining 21 publications (62%) were single-arm studies.[3, 25-29, 31-34, 37-40,  
24  
25 12 44, 47, 48, 50, 55-57]

26  
27  
28  
29  
30  
31  
32 13 A total of 28 studies reported the IV preparation site. Of those studies, 14  
33  
34 14 publications (38%) reported preparation on the nursing ward[3, 25, 26, 28, 31-34, 37, 43, 47, 48,  
35  
36 15 52, 55] and 8 (24%) reported use of central pharmacies.[26, 27, 29, 35, 36, 40, 41, 44, 54] Three  
37  
38 16 studies (12%) compared rates of IAPes in the nursing ward and a central pharmacy[30, 49, 51]  
39  
40 17 and 1 compared IAPes in the nursing ward and operating theater.[53] Lastly, 2 studies reported  
41  
42 18 IV preparation at offsite pharmacies[56] and in the obstetric theater,[57] respectively.

43  
44  
45  
46  
47 19 While IAPes were not consistently linked with individual patient outcomes in the studies  
48  
49 20 surveyed, nearly half of the studies attempted to assess the potential for patient impact in some  
50  
51 21 way. Twelve (35%) of the publications included in this review reported on the severity of harm  
52  
53 22 or potential for harm arising from identified IAPes (see **online supplementary Table S2**), [3,  
54  
55 23 26, 29, 31, 32, 39-41, 44-46, 48] 8 (67%) of which reported  $\geq 1$  errors to result in various degrees  
56  
57  
58  
59  
60

1 of harm,[3, 26, 40, 41, 44-46, 48] and 4 (33%) having reported no errors to have resulted in  
2 adverse outcomes or to have presented a major patient risk.[29, 31, 32, 39]

3 Of the 12 studies that reported on burden of harm, 3 (25%) used the NCC MERP  
4 medication error index[17] to score identified errors;[31, 39, 40] while 6 studies (50%) relied on  
5 clinician assessment or an expert panel for determination of error severity.[3, 26, 41, 44-46]  
6 Among the 6 studies that used clinician assessment or an expert panel, 2 of the study teams  
7 (Niemann et al[46] and Nguyen et al[45]) assessed errors based on clinical relevance rather than  
8 assigning a score based on patient harm or potential for harm. The remaining 3 studies each took  
9 a different approach to estimating patient harm.[29, 32, 48] Ding and colleagues[48] were the  
10 only authors to record whether the error was associated with a drug found on the ISMP list of  
11 high-alert medications. Crill and colleagues[29] did not have a system for rating error severity  
12 but did note that no contamination errors resulted in patient infections. Lastly, the 2008 study by  
13 Fahimi and colleagues[32] did not describe a specific system for rating error severity, but noted  
14 that none of the errors identified resulted in adverse events or major risks to patients. Further  
15 detail on how each study assessed patient burden of harm is shown in **online supplementary**  
16 **Table S4.**

### 17 **Categorization and incidence of IAPEs**

18 Errors identified in the selected studies were grouped into 4 broad categories: component errors,  
19 dose/calculation errors, aseptic technique errors, and composite errors, as detailed in the Methods  
20 section. Errors of the same subtype were frequently defined slightly differently among studies;  
21 full descriptions of the error subtype definitions are shown in **online supplementary Table S5.**  
22 Incidence values for error subtypes are presented in **Table 3.**

**Table 3. Summary of Reported IAPE Incidence by Error Subtype**

| Reference                | Error incidence calculation                     | Component Errors                    |                        |              | Dose / Calculation Errors            |                     |                      | Aseptic Technique Errors             |                         |                           | Composite Errors      |                                 |
|--------------------------|-------------------------------------------------|-------------------------------------|------------------------|--------------|--------------------------------------|---------------------|----------------------|--------------------------------------|-------------------------|---------------------------|-----------------------|---------------------------------|
|                          |                                                 | Wrong Drug                          | Wrong Diluent Solution | Wrong Label  | Wrong Dose                           | Wrong Concentration | Wrong Diluent Volume | General Inadequate Aseptic Technique | Bacterial Contamination | Failure to Disinfect Vial | Improper Hand Hygiene | Any Admixture or Labeling Error |
| Anselmi et al. 2007[25]  | Numerator: errors (including near-misses)       | Site 1: 0/804                       |                        |              | Site 1: 8/804                        |                     |                      |                                      |                         |                           |                       | Across all sites: 118/1391      |
|                          | Denominator: Doses prepared                     | Site 2: 0/100                       |                        |              | Site 2: 2/100                        |                     |                      |                                      |                         |                           |                       |                                 |
|                          | <b>Incidence:</b>                               | Site 3: 1/487<br><b>0.00%–0.20%</b> |                        |              | Site 3: 36/487<br><b>0.90%–7.40%</b> |                     |                      |                                      |                         |                           |                       | <b>8.48%</b>                    |
| Aruna et al. 2015[50]    | Numerator: errors                               |                                     |                        |              |                                      |                     |                      |                                      |                         |                           |                       | 19/225                          |
|                          | Denominator: cases                              |                                     |                        |              |                                      |                     |                      |                                      |                         |                           |                       | <b>8.40%</b>                    |
| Bertsche et al. 2008[26] | Numerator: events                               |                                     |                        |              |                                      |                     |                      |                                      |                         |                           |                       | 218/315                         |
|                          | Denominator: drug-handling processes            |                                     |                        |              |                                      |                     |                      |                                      |                         |                           |                       |                                 |
|                          | <b>Incidence:</b>                               |                                     |                        |              |                                      |                     |                      |                                      |                         |                           |                       | <b>69.20%</b>                   |
| Campino et al. 2016[51]  | Numerator: Errors                               |                                     |                        |              | NICUs: 6/444                         |                     |                      |                                      |                         |                           |                       | NICUs: 243/444                  |
|                          | Denominator: Doses prepared                     |                                     |                        |              | Central pharmacy: 0/60               |                     |                      |                                      |                         |                           |                       | Central pharmacy: 23/60         |
|                          | <b>Incidence:</b>                               |                                     |                        |              | <b>0.00%–1.35%</b>                   |                     |                      |                                      |                         |                           |                       | <b>38.33%–54.73%</b>            |
| Castagne et al. 2011[27] | Numerator: errors (102 near-misses; 544 errors) |                                     |                        |              |                                      | 646/7382            |                      |                                      |                         |                           |                       |                                 |
|                          | Denominator: doses prepared                     |                                     |                        |              |                                      |                     |                      |                                      |                         |                           |                       |                                 |
|                          | <b>Incidence:</b>                               |                                     |                        |              |                                      | <b>8.80%</b>        |                      |                                      |                         |                           |                       |                                 |
| Cousins et al. 2005[28]  | Numerator: errors (not including near-misses)   | UK: 0/273                           | UK: 2/273              | UK: 118/273  | UK: 1/273                            |                     |                      |                                      |                         |                           |                       | UK: 295/299                     |
|                          |                                                 | GER: 0/425                          | GER: 208/425           | GER: 421/425 | GER: 7/425                           |                     |                      |                                      |                         |                           |                       | GER: 245/425                    |
|                          |                                                 | FR: 0/100                           | FR:                    | FR: 421/425  | FR: 5/100                            |                     |                      | 13 /798 total                        |                         |                           |                       | UK: 299/299                     |
|                          |                                                 |                                     |                        |              |                                      |                     |                      |                                      |                         |                           |                       | GER: 403/425                    |

| Reference                      | Error incidence calculation                                                                       | Component Errors   |                        |                      | Dose / Calculation Errors |                     |                                                   | Aseptic Technique Errors             |                         |                           | Composite Errors      |                                 |
|--------------------------------|---------------------------------------------------------------------------------------------------|--------------------|------------------------|----------------------|---------------------------|---------------------|---------------------------------------------------|--------------------------------------|-------------------------|---------------------------|-----------------------|---------------------------------|
|                                |                                                                                                   | Wrong Drug         | Wrong Diluent Solution | Wrong Label          | Wrong Dose                | Wrong Concentration | Wrong Diluent Volume                              | General Inadequate Aseptic Technique | Bacterial Contamination | Failure to Disinfect Vial | Improper Hand Hygiene | Any Admixture or Labeling Error |
|                                | Denominator: doses prepared                                                                       |                    | 18/100                 | FR: 20/100           |                           |                     |                                                   |                                      |                         | FR: 4/100                 | FR: 9/100             |                                 |
|                                | <b>Incidence:</b>                                                                                 | <b>0.00%–0.00%</b> | <b>1.00%–49.00%</b>    | <b>20.00%–99.00%</b> | <b>1.00%–5.00%</b>        |                     | <b>2.00%</b>                                      |                                      |                         | <b>4.00%–99.00%</b>       | <b>9.00%–100%</b>     |                                 |
| <b>Crill et al. 2010[29]*</b>  | Numerator: positive bacterial cultures<br>Denominator: syringes prepared<br><b>Incidence:</b>     |                    |                        |                      |                           |                     |                                                   | 3/90                                 | 3/90                    |                           |                       |                                 |
|                                | <b>Incidence:</b>                                                                                 |                    |                        |                      |                           |                     |                                                   | <b>3.30%</b>                         | <b>3.30%</b>            |                           |                       |                                 |
| <b>Dehmel et al. 2011[30]†</b> | Numerator: errors<br>Denominator: doses prepared<br><b>Incidence:</b>                             |                    |                        |                      |                           |                     | ±5% deviation: 16/100<br>±10%<br>Deviation: 5/100 |                                      |                         |                           |                       |                                 |
|                                | <b>Incidence:</b>                                                                                 |                    |                        |                      |                           |                     | <b>5.00%–16.00%</b>                               |                                      |                         |                           |                       |                                 |
| <b>Dehmel et al. 2011[30]‡</b> | Numerator: errors<br>Denominator: doses prepared<br><b>Incidence:</b>                             |                    |                        |                      |                           |                     | ±5% deviation: 53/100<br>±10% deviation: 22/100   |                                      |                         |                           |                       |                                 |
|                                | <b>Incidence:</b>                                                                                 |                    |                        |                      |                           |                     | <b>22.00%–53.00%</b>                              |                                      |                         |                           |                       |                                 |
| <b>Ding et al. 2015[48]§</b>   | Numerator: errors<br>Denominator: TOE (ordered and unordered doses)<br><b>Incidence:</b>          |                    |                        |                      | 50/593                    |                     |                                                   |                                      |                         |                           |                       | 54/593                          |
|                                | <b>Incidence:</b>                                                                                 |                    |                        |                      | <b>8.43%</b>              |                     |                                                   |                                      |                         |                           |                       | <b>9.10%</b>                    |
| <b>Fahimi et al. 2007[31]</b>  | Numerator: errors (including near-misses)<br>Denominator: doses administered<br><b>Incidence:</b> | 2/43               |                        | 4/43                 | 14/43                     |                     |                                                   |                                      |                         |                           |                       |                                 |
|                                | <b>Incidence:</b>                                                                                 | <b>4.65%</b>       |                        | <b>9.30%</b>         | <b>32.60%</b>             |                     |                                                   |                                      |                         |                           |                       |                                 |
| <b>Fahimi et al. 2008[32]¶</b> | Numerator: errors (including near-misses)<br>Denominator: doses prepared                          |                    | 49/524                 |                      | 38/524                    |                     |                                                   |                                      |                         |                           |                       |                                 |

| Reference                                  | Error incidence calculation            | Component Errors |                        |             | Dose / Calculation Errors |                     |                      | Aseptic Technique Errors             |                         |                           | Composite Errors      |                                 |
|--------------------------------------------|----------------------------------------|------------------|------------------------|-------------|---------------------------|---------------------|----------------------|--------------------------------------|-------------------------|---------------------------|-----------------------|---------------------------------|
|                                            |                                        | Wrong Drug       | Wrong Diluent Solution | Wrong Label | Wrong Dose                | Wrong Concentration | Wrong Diluent Volume | General Inadequate Aseptic Technique | Bacterial Contamination | Failure to Disinfect Vial | Improper Hand Hygiene | Any Admixture or Labeling Error |
|                                            | <b>Incidence:</b>                      |                  | <b>9.35%</b>           |             | <b>7.25%</b>              |                     |                      |                                      |                         |                           |                       |                                 |
|                                            | Numerator: Errors                      |                  |                        |             |                           |                     |                      |                                      |                         |                           |                       |                                 |
|                                            | Denominator: Doses prepared            |                  |                        |             |                           |                     |                      | 177/191                              |                         | 98/191                    |                       |                                 |
| <b>Helder et al. 2016[52]</b>              | <b>Incidence:</b>                      |                  |                        |             |                           |                     |                      | <b>92.67%</b>                        |                         | <b>51.31%</b>             |                       |                                 |
|                                            | Numerator: errors                      |                  |                        |             |                           |                     |                      |                                      |                         |                           |                       |                                 |
|                                            | Denominator: doses administered        |                  |                        |             | 14/99                     |                     |                      | 6/99                                 |                         |                           |                       |                                 |
| <b>Hoefel et al. 2006[33]</b>              | <b>Incidence:</b>                      |                  |                        |             | <b>14.10%</b>             |                     |                      | <b>6.10%</b>                         |                         |                           |                       |                                 |
|                                            | Numerator: positive bacterial cultures |                  |                        |             |                           |                     |                      |                                      |                         | Nursing ward: 1/92        |                       |                                 |
|                                            | Denominator: doses prepared            |                  |                        |             |                           |                     |                      |                                      |                         | Central pharmacy: 0/17    |                       |                                 |
| <b>Khalili et al. 2013[49]</b>             | <b>Incidence:</b>                      |                  |                        |             |                           |                     |                      |                                      |                         | <b>0.00–1.10%</b>         |                       |                                 |
|                                            | Numerator: positive bacterial cultures |                  |                        |             |                           |                     |                      |                                      |                         | 1/51                      |                       |                                 |
|                                            | Denominator: doses prepared            |                  |                        |             |                           |                     |                      |                                      |                         |                           |                       |                                 |
| <b>Macias et al. 2005[34]<sup>†</sup></b>  | <b>Incidence:</b>                      |                  |                        |             |                           |                     |                      |                                      |                         | <b>1.45%</b>              |                       |                                 |
|                                            | Numerator: errors                      |                  |                        |             |                           |                     |                      |                                      |                         |                           |                       |                                 |
|                                            | Denominator: 1000 doses prepared       |                  |                        |             |                           |                     |                      |                                      |                         |                           |                       | 0.66/1000                       |
| <b>MacKay et al. 2009[35]**</b>            | <b>Incidence:</b>                      |                  |                        |             |                           |                     |                      |                                      |                         |                           |                       | <b>0.07%</b>                    |
|                                            | Numerator: errors                      |                  |                        |             |                           |                     |                      | 5% relative error: 1/333             |                         |                           |                       |                                 |
|                                            | Denominator: doses prepared            |                  |                        |             |                           |                     |                      | 10% relative error: 4/333            |                         |                           |                       |                                 |
| <b>Masini et al. 2014[36]<sup>††</sup></b> | <b>Incidence:</b>                      |                  |                        |             |                           |                     |                      | <b>0.30%–1.20%</b>                   |                         |                           |                       |                                 |
|                                            | Numerator: errors                      |                  |                        |             |                           |                     |                      |                                      |                         |                           |                       |                                 |
|                                            | Denominator: doses prepared            | 8/425,683        | 3/425,683              |             | 857/425,683               |                     |                      |                                      |                         | 11/425,683                |                       | 2883/425,683                    |
| <b>Moniz et al. 2014[44]<sup>‡‡</sup></b>  |                                        |                  |                        |             |                           |                     |                      |                                      |                         |                           |                       |                                 |

| Reference                            | Error incidence calculation                       | Component Errors             |                             |             | Dose / Calculation Errors |                                       |                      | Aseptic Technique Errors             |                         |                                       | Composite Errors                     |                                 |
|--------------------------------------|---------------------------------------------------|------------------------------|-----------------------------|-------------|---------------------------|---------------------------------------|----------------------|--------------------------------------|-------------------------|---------------------------------------|--------------------------------------|---------------------------------|
|                                      |                                                   | Wrong Drug                   | Wrong Diluent Solution      | Wrong Label | Wrong Dose                | Wrong Concentration                   | Wrong Diluent Volume | General Inadequate Aseptic Technique | Bacterial Contamination | Failure to Disinfect Vial             | Improper Hand Hygiene                | Any Admixture or Labeling Error |
| Nguyen et al. 2014[45] <sup>§§</sup> | <b>Incidence:</b>                                 | ~0.00%                       | ~0.00%                      |             | 0.20%                     |                                       |                      | ~0.00%                               |                         |                                       |                                      | 0.68%                           |
|                                      | Numerator: errors (including near-misses)         | ICU: 1/236                   |                             |             | ICU: 27/236               |                                       |                      |                                      |                         |                                       |                                      |                                 |
|                                      | Denominator: TOE (administered and omitted doses) | PSU: 1/280                   |                             |             | PSU: 17/280               |                                       |                      |                                      |                         |                                       |                                      | ICU: 159/236<br>PSU: 204/280    |
|                                      | <b>Incidence:</b>                                 | 0.36%–0.42%                  |                             |             | 6.10%–11.40%              |                                       |                      |                                      |                         |                                       |                                      | 67.3%–72.90%                    |
| Niemann et al. 2015[46]              | Numerator: errors                                 |                              |                             |             |                           |                                       | 115/233              |                                      |                         |                                       |                                      |                                 |
|                                      | Denominator: drug-handling processes              |                              | 38/233                      |             |                           |                                       |                      |                                      |                         |                                       |                                      | 138/233                         |
|                                      | <b>Incidence:</b>                                 |                              | 16.00%                      |             |                           |                                       | 49.00%               |                                      |                         |                                       |                                      | 59.00%                          |
| Ong et al. 2013[37]                  | Numerator: errors (including near-misses)         | 1/349                        | 1/349                       | 11/349      |                           |                                       | 61/349               |                                      | 307/349                 | 81/349                                |                                      |                                 |
|                                      | Denominator: doses administered                   |                              |                             |             |                           |                                       |                      |                                      |                         |                                       |                                      |                                 |
|                                      | <b>Incidence:</b>                                 | 0.28%                        | 0.28%                       | 3.20%       |                           |                                       | 17.50%               |                                      | 88.00%                  | 23.20%                                |                                      |                                 |
| Parshuram et al. 2006[38]            | Numerator: errors                                 |                              |                             |             |                           |                                       | 24/78                |                                      |                         |                                       |                                      |                                 |
|                                      | Denominator: infusion bags prepared               |                              |                             |             |                           |                                       |                      |                                      |                         |                                       |                                      |                                 |
|                                      | <b>Incidence:</b>                                 |                              |                             |             |                           |                                       | 31.00%               |                                      |                         |                                       |                                      |                                 |
| Rashed et al. 2016[53]               | Numerator: Errors (including near misses)         |                              | Theater: 0/98               |             |                           | Theater: 31/35<br>Nursing ward: 17/43 |                      | Theater: 25/98<br>Nursing ward: 1/55 |                         | Theater: 98/98<br>Nursing ward: 55/55 | Theater: 82/98<br>Nursing ward: 0/98 |                                 |
|                                      | Denominator: Doses prepared                       |                              | Nursing ward: 1/55          |             |                           |                                       |                      |                                      |                         |                                       |                                      |                                 |
|                                      | <b>Incidence:</b>                                 |                              | 0.00%–1.81%                 |             |                           | 39.53%–88.57%                         |                      | 1.81%–15.31%                         |                         | 100%–100%                             | 0.00%–83.67%                         |                                 |
| Reece et al. 2016[54]                | Numerator: Errors                                 | Self-reported: 1/15,843      | Self-reported: 4/15,843     |             | Self-reported: 7/15,843   |                                       |                      | Self-reported: 4/15,843              |                         |                                       |                                      |                                 |
|                                      | Denominator: Doses prepared:                      | Software reported: 52/51,037 | Software reported: 5/51,037 |             | Software reported: 797/   |                                       |                      | Software reported: 37/               |                         |                                       |                                      |                                 |
|                                      |                                                   |                              |                             |             |                           |                                       |                      |                                      |                         |                                       |                                      |                                 |

| Reference                                               | Error incidence calculation                                                                                 | Component Errors   |                        |             | Dose / Calculation Errors |                     |                      | Aseptic Technique Errors             |                         |                           | Composite Errors      |                                 |
|---------------------------------------------------------|-------------------------------------------------------------------------------------------------------------|--------------------|------------------------|-------------|---------------------------|---------------------|----------------------|--------------------------------------|-------------------------|---------------------------|-----------------------|---------------------------------|
|                                                         |                                                                                                             | Wrong Drug         | Wrong Diluent Solution | Wrong Label | Wrong Dose                | Wrong Concentration | Wrong Diluent Volume | General Inadequate Aseptic Technique | Bacterial Contamination | Failure to Disinfect Vial | Improper Hand Hygiene | Any Admixture or Labeling Error |
|                                                         |                                                                                                             |                    |                        |             | 51,037                    |                     | 51,037               |                                      |                         |                           |                       |                                 |
|                                                         | <b>Incidence:</b>                                                                                           | <b>~0.00–0.01%</b> | <b>0.01%–0.03%</b>     |             | <b>0.04%–1.56%</b>        |                     | <b>0.03%–0.07%</b>   |                                      |                         |                           |                       |                                 |
| <b>Rodriguez-Gonzalez et al. 2012[39]<sup>III</sup></b> | Numerator: errors (including near-misses)<br>Denominator: TOE (observed administrations plus omitted doses) |                    | 8/402                  |             |                           |                     | 32/402               |                                      |                         |                           |                       |                                 |
|                                                         | <b>Incidence:</b>                                                                                           |                    | <b>1.99%</b>           |             |                           |                     | <b>7.96%</b>         |                                      |                         |                           |                       |                                 |
| <b>Sacks et al. 2009[40]</b>                            | Numerator: errors<br>Denominator: doses prescribed                                                          |                    |                        |             |                           |                     |                      |                                      |                         |                           |                       | 18/4730                         |
|                                                         | <b>Incidence</b>                                                                                            |                    |                        |             |                           |                     |                      |                                      |                         |                           |                       | <b>0.38%</b>                    |
| <b>Seger et al. 2012[41]<sup>II</sup></b>               | Numerator: errors<br>Denominator: doses prepared                                                            | 3/1421             |                        |             |                           | 23/184              |                      |                                      |                         |                           |                       |                                 |
|                                                         | <b>Incidence:</b>                                                                                           | <b>0.21%</b>       |                        |             |                           | <b>12.50%</b>       |                      |                                      |                         |                           |                       |                                 |
| <b>Skouroliahou et al. 2005[42]</b>                     | Numerator: errors<br>Denominator: solutions prepared                                                        |                    |                        |             |                           | 20/941              | 8/941                |                                      |                         |                           |                       |                                 |
|                                                         | <b>Incidence:</b>                                                                                           |                    |                        |             |                           | <b>2.13%</b>        | <b>0.85%</b>         |                                      |                         |                           |                       |                                 |
| <b>Tavakoli-Ardakani et al. 2013[47]<sup>III</sup></b>  | Numerator: errors<br>Denominator: TOE                                                                       |                    |                        |             |                           |                     |                      |                                      |                         |                           |                       | 2705/8322                       |
|                                                         | <b>Incidence:</b>                                                                                           |                    |                        |             |                           |                     |                      |                                      |                         |                           |                       | <b>32.50%</b>                   |
| <b>Terkola et al. 2017[56]</b>                          | Numerator: Errors<br>Denominator: Preparations                                                              |                    |                        |             |                           | 59,890/759,060      |                      |                                      |                         |                           |                       |                                 |
|                                                         | <b>Incidence:</b>                                                                                           |                    |                        |             |                           | <b>7.89%</b>        |                      |                                      |                         |                           |                       |                                 |



| Reference                      | Error incidence calculation                                                                       | Component Errors |                        |                    | Dose / Calculation Errors |                     |                      | Aseptic Technique Errors             |                         |                           | Composite Errors      |                                 |
|--------------------------------|---------------------------------------------------------------------------------------------------|------------------|------------------------|--------------------|---------------------------|---------------------|----------------------|--------------------------------------|-------------------------|---------------------------|-----------------------|---------------------------------|
|                                |                                                                                                   | Wrong Drug       | Wrong Diluent Solution | Wrong Label        | Wrong Dose                | Wrong Concentration | Wrong Diluent Volume | General Inadequate Aseptic Technique | Bacterial Contamination | Failure to Disinfect Vial | Improper Hand Hygiene | Any Admixture or Labeling Error |
| van den Heever et al. 2016[57] | Numerator: Errors<br>Denominator: Sampled preparations                                            |                  |                        | 0-101/110          |                           |                     |                      |                                      | 7/110                   |                           |                       |                                 |
|                                | <b>Incidence:</b>                                                                                 |                  |                        | <b>0.00-91.81%</b> |                           |                     |                      |                                      | <b>6.36%</b>            |                           |                       |                                 |
| Westbrook et al. 2011[3]       | Numerator: errors (including near-misses)<br>Denominator: doses administered                      | 1/568            | 21/568                 |                    |                           |                     | 121/568              |                                      |                         |                           |                       |                                 |
|                                | <b>Incidence:</b>                                                                                 | <b>0.18%</b>     | <b>3.70%</b>           |                    |                           |                     | <b>21.30%</b>        |                                      |                         |                           |                       |                                 |
| Wheeler et al. 2008[43]        | Numerator: errors<br>Denominator: syringes prepared                                               |                  |                        | 88/149             |                           |                     |                      |                                      |                         |                           |                       |                                 |
|                                | <b>Incidence:</b>                                                                                 |                  |                        | <b>59.10%</b>      |                           |                     |                      |                                      |                         |                           |                       |                                 |
| Yin et al. 2016[55]***         | Numerator: Doses with ≥1 errors<br>Denominator: TOE (observed administrations plus omitted doses) | 0/122            |                        | 15/122             | 1/122                     |                     | 14/122               |                                      |                         |                           |                       | 69/122                          |
|                                | <b>Incidence:</b>                                                                                 | <b>0.00%</b>     |                        | <b>12.30%</b>      | <b>0.82%</b>              |                     | <b>11.50%</b>        |                                      |                         |                           |                       | <b>56.66%</b>                   |

\* Crill et al. 2010[29]. Authors speculate that contamination arose during preparation, but note that it may also have occurred during or after administration.

† Dehmel et al. 2011[30]. Results presented for automated preparation in the centralized pharmacy.

‡ Dehmel et al. 2011[30]. Results presented for manual preparation in the nursing ward.

§ Ding et al. 2015[48]. Wrong dose error rate combines wrong dose, omission, and extra dose.

¶ Fahimi et al. 2008[32]. Wrong dose and wrong diluent volume were combined into 1 value in the original article.

|| Macias et al. 2005[34]. This study was designed to observe a sepsis outbreak. Only baseline (pre-outbreak) data are presented in this table.

\*\* MacKay et al. 2009[35]. This study tested automation as an intervention. Only baseline data is presented in this table.

†† Masini et al. 2014[36]. Results presented for manual preparation only.

‡‡ Moniz et al. 2014[44]. Wrong volume of drug/diluent (detectable by previous practices), wrong drug volume (not detectable by previous practices), and wrong diluent volume (not detectable by previous practices) are combined in this table as wrong dose.

§§ Nguyen et al. 2014[45]. This was an interventional study. Only baseline data is presented in this table.

¶¶ Rodriguez-Gonzalez et al. 2012[39]. Errors were defined as "wrong reconstitution (volume, fluid)," which is reported in this table as wrong diluent solution, and "wrong dilution (volume, fluid)," which is reported in this table as wrong diluent volume.

1  
2  
3  
4  
5  
6  
7  
8  
9  
10  
11  
12  
13  
14  
15  
16  
17  
18  
19  
20  
21  
22  
23  
24  
25  
26  
27  
28  
29  
30  
31  
32  
33  
34  
35  
36  
37  
38  
39  
40  
41  
42  
43  
44  
45  
46  
47  
48  
49

|| Seger et al. 2012[41]. Results presented for manual preparation only. Wrong dose and wrong diluent were reported as a combined value in the original article.  
\*\*\* Yin et al. 2016[55]. One preparation out of 122 was subcutaneous rather than IV. Denominator for concentration errors is IV preparations only.  
††† Tavakoli-Ardakani et al. 2013[47]. This study reported that additional data was collected by error subcategory; however, these data are not present in the available publication.  
Unless otherwise noted, all data reported from interventional studies are from the baseline period only.

FR, France; GER, Germany; ICU, intensive care unit; PSU, post-surgical unit; TOE, total opportunities for error; UK, United Kingdom

For peer review only

1  
2  
3 1 The error subtype of wrong drug selection was infrequent,[3, 25, 28, 31, 37, 41, 44, 45,  
4  
5 2 54, 55] with the highest reported rate of 4.7% of total doses.[31] Selection of a wrong diluent  
6  
7 3 solution was reported to have occurred in 9 of 34 publications (26%), with results varying across  
8  
9 4 studies (~0% to 49.0%).[3, 28, 32, 37, 39, 44, 46, 53, 54] Of note, the multicenter, multinational  
10  
11 5 study by Cousins et al[28] reported that 1.0% to 49.0% of doses administered had been prepared  
12  
13 6 with an incorrect diluent across all study sites. This range is wider than that of the other included  
14  
15 7 studies (0% to 16.0%). Labeling errors were reported in 6 publications (18%), with reported  
16  
17 8 incidence varying substantially, ranging from 0% to 99.0% (20.0% to 99.0% within the study by  
18  
19 9 Cousins et al[28] and 0% to 91.8% in the study by van den Heever et al study[57]).[28, 31, 37,  
20  
21 10 43, 55, 57]

22  
23  
24  
25  
26  
27  
28 11 Eleven publications (32%) captured incidence of wrong dose, and while most of these  
29  
30 12 studies reported incidence rates below 10%,[25, 28, 32, 33, 44, 45, 48, 51, 54, 55] 1 study did  
31  
32 13 report an incidence rate over 32%.[31] Wrong drug concentration errors were reported in 10  
33  
34 14 publications (29%), with error incidence per total number of IV doses prepared ranging from  
35  
36 15 0.3% to 88.6%.[27, 30, 36, 38, 41, 42, 51, 53, 55, 56] While some studies defined a  
37  
38 16 concentration error based on a threshold of a 5%[30, 36, 41] or 10%[30, 36, 38, 51, 55] deviation  
39  
40 17 between the prepared dose and the ideal dose, the study by Castagne et al used a higher threshold  
41  
42 18 of 20%.[27]

43  
44  
45  
46  
47 19 Eight studies (24%) reported errors pertaining to wrong diluent volume,[3, 28, 33, 37, 39,  
48  
49 20 42, 46, 54] with half explicitly defining this error subgroup as any deviation from manufacturer  
50  
51 21 or accepted institutional guidelines for IV preparation.[3, 37, 39, 46] The highest-reported error  
52  
53 22 rate (49.0%) was identified by Niemann and colleagues,[46] while the lowest-reported incidence  
54  
55 23 (0.6%) was from a study by Reece et al.[54]

1  
2  
3 1 Reported challenges with aseptic technique included general aseptic technique deviations,  
4  
5  
6 2 bacterial contamination, failure to disinfect the vial, and improper hand hygiene. In studies that  
7  
8 3 reported general inadequate aseptic technique deviations, 3 studies reported incidence rates  
9  
10 4 below 5% (range: 0% to 3.3%)[29, 44, 53]; however, the study by Bertsche and colleagues[26]  
11  
12 5 reported an incidence rate of just under 70% and findings from Helder et al indicated a 92.7%  
13  
14 6 nonadherence rate to hygiene protocols.[52] The variation in incidence rates presented may be  
15  
16 7 the result of differences in error definitions, as Bertsche and colleagues assessed aseptic  
17  
18 8 technique deviations as any procedural deviation from local hygiene guidelines[26] and a study  
19  
20 9 by Helder et al required all 5 steps of the hygiene protocol to be followed.[52] The other studies  
21  
22 10 defined aseptic technique errors either based on bacterial cultures[29, 34] or report of syringes  
23  
24 11 left uncapped during the preparation process.[44]  
25  
26  
27  
28  
29

30 12 Bacterial contamination errors were reported in 4 studies, with all reporting incidence  
31  
32 13 under 7% (**Table 3**).[29, 34, 49, 57] Four additional studies report error incidence for both  
33  
34 14 failure to disinfect the vial[28, 37, 52, 53] and improper hand hygiene.[28, 37, 53] In particular,  
35  
36 15 the study by Cousins and colleagues[28] presents a wide range of incidence across aseptic  
37  
38 16 technique subtypes (**Table 3**). The study by Cousins et al[28] presented data from 3 separate  
39  
40 17 institutions located in France, Germany, and the United Kingdom, with the incidence of aseptic  
41  
42 18 technique errors from the French institution found to be dramatically lower (4.0% for vial  
43  
44 19 disinfection and 9.0% for hand washing). Of note, the authors attribute this difference to the  
45  
46 20 French institution having undergone a recent update to its aseptic preparation methods protocol  
47  
48 21 due to a prior outbreak of Legionnaire's disease within the facility.[28]  
49  
50  
51  
52  
53  
54  
55  
56  
57  
58  
59  
60

1  
2  
3 1 Ten (29%) studies reported an overall incidence of IAPEs that combined multiple error  
4  
5  
6 2 subtypes.[25, 35, 40, 44-48, 50, 55] These studies have diverse error definitions and error  
7  
8 3 detection methods; thus, the error incidence ranges widely (0.07% to 72.9%).  
9

#### 10 4 **DISCUSSION**

11  
12  
13  
14 5 This systematic review found that IAPEs are ubiquitous across countries and hospital locations,  
15  
16 6 and that the types of errors observed and reported are diverse. Reported error incidence was  
17  
18 7 found to vary widely not only between settings (central pharmacies or nursing wards) but also  
19  
20 8 within these settings across studies. Variability in error detection methods and definitions applied  
21  
22 9 may contribute to the variation in error rates reported across studies.  
23  
24  
25

26  
27 10 This review identified studies conducted in Europe, North America, South America,  
28  
29 11 Asia, and Africa. While different regions, countries, and even individual institutions are likely to  
30  
31 12 have somewhat different standards and practices for IV admixture preparation, differences in  
32  
33 13 methods and terms applied for data collection did not seem to vary any greater between countries  
34  
35 14 than within a single country. In theory, variation among institutions within the same country has  
36  
37 15 the potential to be larger than variation among countries, as local practices may be more flexible  
38  
39 16 than nationally adopted standards. ISMP noted in its 2011 Guidelines for the Safe Preparation of  
40  
41 17 Sterile Compounds that IV admixture preparation practices are complex, and documentation of  
42  
43 18 errors varies widely across the United States.[58] This highlights an important need for national  
44  
45 19 and international consensuses on defining and identifying IAPEs to fully understand the global  
46  
47 20 patient burden.  
48  
49  
50  
51

52  
53 21 Some evidence indicates the effect of location and method of IV admixture preparation  
54  
55 22 on the incidence of errors. In particular, error rates appear to be lower when IV preparation takes  
56  
57  
58  
59  
60

1  
2  
3 1 place in central pharmacy settings compared with nursing wards, and lower with automated  
4  
5 2 versus manual preparation. Among studies meeting the inclusion criteria for this systematic  
6  
7 3 review, Dehmel and colleagues[30] and Khalili et al[49] directly compared error rates identified  
8  
9 4 from a central pharmacy to those from a nursing ward using consistent IAPE definitions across  
10  
11 5 settings. The study by Dehmel et al reported a markedly higher rate of wrong concentration  
12  
13 6 errors using manual preparation in a nursing ward when compared with automated preparation in  
14  
15 7 a central pharmacy (53% vs 16%, respectively).[30] Khalili and colleagues reported a low rate of  
16  
17 8 bacterial contamination (1.1%) in admixtures prepared on nursing wards, with no instances of  
18  
19 9 contamination in admixtures prepared in central pharmacies, despite use of manual preparation  
20  
21 10 techniques in each setting.[49] Caution should be taken in generalizing this finding, given the  
22  
23 11 limited sample size of 17 preparations in the central pharmacy and 97 on the nursing ward.[49]  
24  
25 12 Thus, while it appears that moving IV admixture preparation away from the site of care and  
26  
27 13 using automated technologies may reduce IAPes, further empirical studies are required to  
28  
29 14 substantiate this hypothesis.  
30  
31  
32  
33  
34  
35  
36

37 15 In the present systematic review of IAPes, a patchwork of data emerged from the  
38  
39 16 relevant available literature, in part because no single study design or observational technique is  
40  
41 17 ideal for capturing all the aspects of IV admixture preparation that could result in an error. The  
42  
43 18 majority of studies relied on direct observation of the IV admixture preparation process by a  
44  
45 19 trained observer, while other studies used bacterial culture, measurement of the final admixture  
46  
47 20 concentration, incident reports, and cross-checking against a checklist, computed calculation, or  
48  
49 21 other benchmarks. However, certain error subtypes naturally lent themselves to a specific  
50  
51 22 observational technique, such as bacterial culture for assessing bacterial contamination,  
52  
53  
54  
55  
56  
57  
58  
59  
60

1 laboratory testing for concentration errors, and direct observation for aseptic technique  
2  
3  
4  
5  
6  
7  
8  
9  
10  
11  
12  
13  
14  
15  
16  
17  
18  
19  
20  
21  
22  
23  
24  
25  
26  
27  
28  
29  
30  
31  
32  
33  
34  
35  
36  
37  
38  
39  
40  
41  
42  
43  
44  
45  
46  
47  
48  
49  
50  
51  
52  
53  
54  
55  
56  
57  
58  
59  
60

1 laboratory testing for concentration errors, and direct observation for aseptic technique  
2 deviations.

3       The framework used for categorizing IAPes in this review was developed to facilitate the  
4 aggregation of data collected across studies. While inconsistency across reported error  
5 definitions precluded additional quantitative aggregation, we hope the classification system used  
6 herein is informative to researchers designing future studies, and may help to facilitate more  
7 effective standardization of error reporting going forward.

8       Within IAPE subtypes, the method of error calculation varied in some cases, which  
9 impacted the ability to generalize results across studies. The majority of studies reported the  
10 incidence as errors per doses prescribed, prepared, or administered. However, 5 (15%) studies  
11 reported errors per total opportunities for error[39, 45, 47, 48, 55] and 2 (6%) studies reported  
12 errors per total drug-handling processes.[26, 46] While using total opportunities for error or  
13 drug-handling processes may be insightful for those wishing to understand and optimize the IV  
14 medication use cycle from the user perspective, errors per dose may be a more useful  
15 measurement for researchers interested in patient impact and outcomes.

16       Error definitions were also variable within some error subtypes. For instance, thresholds  
17 for determining concentration errors ranged from  $\pm 5\%$  variance from the label specification to as  
18 high as  $\pm 20\%$  variance.[27, 30, 36, 38, 41, 42, 51, 53, 55, 56] Studies reporting IAPE incidence  
19 based on a composite of IAPE subtypes were often composed of common elements (eg, wrong  
20 drug, wrong concentration), but were sufficiently different that they could not be directly  
21 compared. This finding exposes a need for a standardized taxonomy of error subtypes that can be  
22 used across a variety of research settings and countries to facilitate meaningful comparisons.

1  
2  
3 1 Other factors that may impact error incidence are circumstances, such as either a recent  
4  
5 2 training or sentinel event as described by a study by Cousins et al,[28] when commenting on  
6  
7 3 proportionally lower aseptic technique deviations observed in the French study site. It was  
8  
9 4 suggested that this finding may be attributed to recent staff training and updated guidelines in the  
10  
11 5 French institution included in the study, prompted by a recent outbreak of Legionnaire's disease  
12  
13 6 at that site. This highlights the impact of staff training not only as a source of potential regional  
14  
15 7 or institutional error variation, but also as a means of reducing error rates. Given the short  
16  
17 8 duration between staff training and study implementation, the long-term sustainability of error  
18  
19 9 reduction potentially gained by staff training in the study by Cousins et al was unclear.  
20  
21  
22  
23  
24

25 10 In addition to heterogeneous error incidence results, the articles captured in this  
26  
27 11 systematic review used a variety of approaches to measuring the potential burden of patient  
28  
29 12 harm. Several studies used the existing NCC MERP error index[17] to rate and score errors, and  
30  
31 13 the majority of other studies relied on either local clinician opinion or expert panel. As a result,  
32  
33 14 there is a high degree of variability in terms of how the errors are scored and how potential for  
34  
35 15 patient risk is attributed.  
36  
37  
38  
39

40 16 Of the 26 studies included in this review, 12 (35%) provided estimates or general  
41  
42 17 assessments for potentially attributable patient harm or clinical relevance for IAPes,[3, 26, 29,  
43  
44 18 31, 32, 39-41, 44-46, 48]. Effective and standardized traceability measures are required to link a  
45  
46 19 defect in the admixture process that occurs early within the medication use cycle with later  
47  
48 20 negative patient outcomes. Given the separation in time and physical location between admixture  
49  
50 21 preparation and potential patient physical adverse response, it can be challenging to link potential  
51  
52 22 negative patient outcomes to the admixture/compounding process where unrecognized potential  
53  
54  
55  
56  
57  
58  
59  
60



1 errors may exist.[12] There is a need for robust study designs that allow for the assessment of the  
2 association between specific errors incidences and patient outcomes.

3         Several limitations were present in this systematic review. Our search strategy targeted  
4 the broad medical literature, but inclusion of additional databases, such as the Cumulative Index  
5 of Nursing and Allied Health Literature, may have added nursing publications relevant to this  
6 topic. While the quality of publications was generally fair, only 5 studies (15%) were deemed to  
7 be of good quality in terms of methodology and reporting.[30, 34, 38, 45, 46] Furthermore, the  
8 Hawker method of quality ascertainment is generic and may not be best suited to capturing the  
9 unique challenges of this research topic. Drawing comparisons between the studies remains  
10 difficult due to substantial variations in error definitions. As a result, meta-analysis of the current  
11 IAPE literature was not considered appropriate. Lastly, in the majority of studies, documentation  
12 of error severity and associated burden of harm was not sufficient to allow for a thorough  
13 evaluation of the impact on patient care or the consequences for healthcare facilities.

## 14 **CONCLUSIONS**

15 This systematic review is the first to categorize IAPes according to the characteristics of the  
16 error and the location and method of IV preparation. It is our hope that future studies may use  
17 these categorizations to provide a meaningful framework to assess IAPes within their procedural  
18 context. With improved standardization of IAPE definitions, grouping error subtypes as we have  
19 done may facilitate an improved understanding of where errors happen within the IV preparation  
20 process and devising solutions to help eradicate them. There is a clear potential burden of harm  
21 for patients resulting from IAPes, and thus a need to continue to optimize the IV preparation  
22 process, focusing on improving preparation workflow, designing and implementing preventive  
23 strategies, staff training, and implementing process standardization where possible. Future

1  
2  
3 1 research should focus on the development of consistent error subtype definitions and a  
4  
5  
6 2 standardized reporting methodology as well as reliable and reproducible methods to track and  
7  
8 3 link risk factors and the burden of harm associated with these errors.  
9

## 10 4 11 12 13 14 5 15 16 17 6 **Acknowledgements**

18  
19  
20 7 The authors would like to thank Diane Nitzki-George and Denise Hefley of DNG Consulting for  
21  
22 8 their assistance rendered in this study. Editorial assistance was provided by Oxford  
23  
24  
25 9 PharmaGenesis Inc. and was funded by Baxter Healthcare Corporation.  
26

## 27 28 10 **Data Sharing Statement**

29  
30 11 As the research presented is a systematic literature review of published data, no additional  
31  
32 12 unpublished data are available.  
33  
34

## 35 36 13 **Funding**

37  
38 14 This study was sponsored by Baxter Healthcare Corporation.  
39  
40

## 41 15 **Contributors**

42  
43  
44 16 NH: Concept/design, data analysis/interpretation, critical revision of article, approval of article.  
45

46  
47 17 IB: Data interpretation, critical revision of article, approval of article.  
48

49  
50 18 T H-T: Concept/design, data interpretation, critical revision of article, approval of article.  
51

52  
53 19 PT: Concept/design, data interpretation, critical revision of article, approval of article.  
54

## 55 56 20 **Competing Interests** 57 58 59 60

1  
2  
3 1 NH is a former employee and stockholder of Baxter Healthcare Corporation.  
4

5  
6 2 IB is an employee and stockholder of Baxter Healthcare Corporation.  
7

8  
9 3 T H-T has no relevant competing interests to disclose.  
10

11 4 PT is currently under contract to perform other work for Baxter Healthcare Corporation that is

12  
13  
14 5 unrelated to the current manuscript.  
15

16  
17 6  
18

19 7  
20  
21  
22  
23  
24  
25  
26  
27  
28  
29  
30  
31  
32  
33  
34  
35  
36  
37  
38  
39  
40  
41  
42  
43  
44  
45  
46  
47  
48  
49  
50  
51  
52  
53  
54  
55  
56  
57  
58  
59  
60

1  
2  
3 1 REFERENCES  
4

- 5  
6 2 1. Leape LL, Brennan TA, Laird N, et al. The nature of adverse events in hospitalized  
7 patients. Results of the Harvard Medical Practice Study II. *N Engl J Med* 1991;324:377-  
8 3 84.  
9  
10 4  
11  
12 5 2. Phillips J, Beam S, Brinker A, et al. Retrospective analysis of mortalities associated with  
13 medication errors. *Am J Health Syst Pharm* 2001;58:1835-41.  
14 6  
15  
16 7 3. Westbrook JI, Rob MI, Woods A, et al. Errors in the administration of intravenous  
17 medications in hospital and the role of correct procedures and nurse experience. *BMJ*  
18 *Qual Saf* 2011;20:1027-34.  
19 8  
20  
21 9  
22  
23 10 4. ISMP Canada. Managing overfill during preparation and delivery of intravenous  
24 medications. *ISMP Canada Safety Bulletin* 2013;13(7). <https://www.ismp->  
25 [canada.org/download/safetyBulletins/2013/ISMPCSB2013-](https://www.ismp-canada.org/download/safetyBulletins/2013/ISMPCSB2013-)  
26 [07\\_ManagingOverfillIntravenousMedications.pdf](https://www.ismp-canada.org/download/safetyBulletins/2013/ISMPCSB2013-07_ManagingOverfillIntravenousMedications.pdf) (accessed 13 June 2017).  
27  
28  
29  
30  
31  
32  
33  
34 14 5. Flynn EA, Pearson RE, Barker KN. Observational study of accuracy in compounding i.v.  
35 admixtures at five hospitals. *Am J Health Syst Pharm* 1997;54:904-12.  
36  
37  
38  
39 16 6. The National Coordinating Council for Medication Error Reporting and Prevention. The  
40 Council: Moving into the Second Decade "Developing Recommendations and Offering  
41  
42  
43  
44  
45  
46  
47  
48  
49 20 7. Pedersen CA, Schneider PJ, Scheckelhoff DJ. ASHP national survey of pharmacy  
50 practice in hospital settings: Dispensing and administration—2014. *Am J Health Syst*  
51 *Pharm* 2015;72:1119-37.  
52  
53  
54  
55  
56  
57  
58  
59  
60

- 1  
2  
3 1 8. Speth SL, Fields DB, Schlemmer CB, et al. Optimizing i.v. workflow. *Am J Health Syst*  
4  
5 2  
6 *Pharm* 2013;70:2076, 78-80.  
7  
8 3 9. Leape LL, Bates DW, Cullen DJ, et al. Systems analysis of adverse drug events. *JAMA*  
9  
10 4  
11 1995;274:35-43.  
12  
13 5 10. Bates DW, Boyle DL, Vander Vliet MB, et al. Relationship between medication errors  
14  
15 6  
16 and adverse drug events. *J Gen Intern Med* 1995;10:199-205.  
17  
18 7 11. Walsh KE, Dodd KS, Seetharaman K, et al. Medication errors among adults and children  
19  
20 8  
21 with cancer in the outpatient setting. *J Clin Oncol* 2009;27:891-6.  
22  
23 9 12. White R, Cassano-Piche A, Fields A, et al. Intravenous chemotherapy preparation errors:  
24  
25 10  
26 patient safety risks identified in a pan-Canadian exploratory study. *J Oncol Pharm Pract*  
27  
28 11  
29 2014;20:40-6.  
30  
31 12 13. Walsh KE, Kaushal R, Chessare JB. How to avoid paediatric medication errors: a user's  
32  
33 13  
34 guide to the literature. *Arch Dis Child* 2005;90:698-702.  
35  
36 14 14. Bertoglio S, Rezzo R, Merlo FD, et al. Pre-filled normal saline syringes to reduce totally  
37  
38 15  
39 implantable venous access device-associated bloodstream infection: a single institution  
40  
41 16  
42 pilot study. *J Hosp Infect* 2013;84:85-8.  
43  
44 17 15. Macias AE, Huertas M, de Leon SP, et al. Contamination of intravenous fluids: a  
45  
46 18  
47 continuing cause of hospital bacteremia. *Am J Infect Control* 2010;38:217-21.  
48  
49 19 16. ISMP List of High-Alert Medications in Acute Care Settings. 2014.  
50  
51 20  
52 <https://www.ismp.org/tools/institutionalhighAlert.asp> (accessed 13 Jun 2017).  
53  
54 21 17. NCC MERP Index for Categorizing Medication Errors. 2001.  
55  
56 22  
57 <http://www.nccmerp.org/sites/default/files/indexBW2001-06-12.pdf> (accessed 13 Jun  
58  
59 23  
60 2017).

- 1  
2  
3 1 18. Cousins DH, Gerrett D, Warner B. A review of medication incidents reported to the  
4  
5  
6 2 National Reporting and Learning System in England and Wales over 6 years (2005-  
7  
8 3 2010). *Br J Clin Pharmacol* 2012;74:597-604.  
9  
10 4 19. Abbasinazari M, Zareh-Toranposhti S, Hassani A, et al. The effect of information  
11  
12 5 provision on reduction of errors in intravenous drug preparation and administration by  
13  
14 6 nurses in ICU and surgical wards. *Acta Med Iran* 2012;50:771-7.  
15  
16 7 20. Chua SS, Tea MH, Rahman MH. An observational study of drug administration errors in  
17  
18 8 a Malaysian hospital (study of drug administration errors). *J Clin Pharm Ther*  
19  
20 9 2009;34:215-23.  
21  
22 10 21. Prot S, Fontan JE, Alberti C, et al. Drug administration errors and their determinants in  
23  
24 11 pediatric in-patients. *Int J Qual Health Care* 2005;17:381-9.  
25  
26 12 22. Moher D, Liberati A, Tetzlaff J, et al. Preferred reporting items for systematic reviews  
27  
28 13 and meta-analyses: the PRISMA statement. *PLoS Med* 2009;6:e1000097.  
29  
30 14 23. Hawker S, Payne S, Kerr C, et al. Appraising the evidence: reviewing disparate data  
31  
32 15 systematically. *Qual Health Res* 2002;12:1284-99.  
33  
34 16 24. Green J, Jester R, McKinley R, et al. The impact of chronic venous leg ulcers: a  
35  
36 17 systematic review. *J Wound Care* 2014;23:601-12.  
37  
38 18 25. Anselmi ML, Peduzzi M, Dos Santos CB. Errors in the administration of intravenous  
39  
40 19 medication in Brazilian hospitals. *J Clin Nurs* 2007;16:1839-47.  
41  
42 20 26. Bertsche T, Niemann D, Mayer Y, et al. Prioritising the prevention of medication  
43  
44 21 handling errors. *Pharm World Sci* 2008;30:907-15.  
45  
46  
47  
48  
49  
50  
51  
52  
53  
54  
55  
56  
57  
58  
59  
60

- 1  
2  
3 1 27. Castagne V, Habert H, Abbara C, et al. Cytotoxics compounded sterile preparation  
4 control by HPLC during a 16-month assessment in a French university hospital:  
5 importance of the mixing bags step. *J Oncol Pharm Pract* 2011;17:191-6.  
6  
7  
8 2 28. Cousins DH, Sabatier B, Begue D, et al. Medication errors in intravenous drug  
9 preparation and administration: a multicentre audit in the UK, Germany and France. *Qual*  
10 *Saf Health Care* 2005;14:190-5.  
11  
12  
13 3 29. Crill CM, Hak EB, Robinson LA, et al. Evaluation of microbial contamination associated  
14 with different preparation methods for neonatal intravenous fat emulsion infusion. *Am J*  
15 *Health Syst Pharm* 2010;67:914-8.  
16  
17  
18 4 30. Dehmel C, Braune SA, Kreymann G, et al. Do centrally pre-prepared solutions achieve  
19 more reliable drug concentrations than solutions prepared on the ward? *Intensive Care*  
20 *Med* 2011;37:1311-6.  
21  
22  
23 5 31. Fahimi F, Sistanizad M, Abrishami R, et al. An observational study of errors related to  
24 the preparation and administration of medications given by infusion devices in a teaching  
25 hospital. *Iran J Pharm Res* 2007;6:295-99.  
26  
27  
28 6 32. Fahimi F, Ariapanah P, Faizi M, et al. Errors in preparation and administration of  
29 intravenous medications in the intensive care unit of a teaching hospital: an observational  
30 study. *Aust Crit Care* 2008;21:110-6.  
31  
32  
33 7 33. Hoefel HH, Lautert L. Errors committed by nursing technicians and assistants in  
34 administering antibiotics. *Am J Infect Control* 2006;34:437-42.  
35  
36  
37 8 34. Macias AE, Munoz JM, Galvan A, et al. Nosocomial bacteremia in neonates related to  
38 poor standards of care. *Pediatr Infect Dis J* 2005;24:713-6.  
39  
40  
41  
42  
43  
44  
45  
46  
47  
48  
49  
50  
51  
52  
53  
54  
55  
56  
57  
58  
59  
60

- 1  
2  
3 1 35. Mackay MW, Cash J, Farr F, et al. Improving Pediatric Outcomes through Intravenous  
4 and Oral Medication Standardization. *J Pediatr Pharmacol Ther* 2009;14:226-35.  
5  
6 2  
7  
8 3 36. Masini C, Nanni O, Antaridi S, et al. Automated preparation of chemotherapy: quality  
9 improvement and economic sustainability. *Am J Health Syst Pharm* 2014;71:579-85.  
10  
11 4  
12  
13 5 37. Ong WM, Subasyini S. Medication errors in intravenous drug preparation and  
14 administration. *Med J Malaysia* 2013;68:52-7.  
15  
16 6  
17  
18 7 38. Parshuram CS, Dupuis LL, To T, et al. Occurrence and impact of unanticipated variation  
19 in intravenous methotrexate dosing. *Ann Pharmacother* 2006;40:805-11.  
20  
21 8  
22  
23 9 39. Rodriguez-Gonzalez CG, Herranz-Alonso A, Martin-Barbero ML, et al. Prevalence of  
24 medication administration errors in two medical units with automated prescription and  
25 dispensing. *J Am Med Inform Assoc* 2012;19:72-8.  
26  
27 10  
28  
29 11  
30  
31 12 40. Sacks GS, Rough S, Kudsk KA. Frequency and severity of harm of medication errors  
32 related to the parenteral nutrition process in a large university teaching hospital.  
33  
34 13  
35 14  
36 15 41. Seger AC, Churchill WW, Keohane CA, et al. Impact of robotic antineoplastic  
37 preparation on safety, workflow, and costs. *J Oncol Pract* 2012;8:344-49.  
38  
39 16  
40  
41 17 42. Skouroliakou M, Konstantinou D, Papasarantopoulos P, et al. Computer assisted total  
42 parenteral nutrition for pre-term and sick term neonates. *Pharm World Sci* 2005;27:305-  
43  
44 18  
45 19  
46 10.  
47  
48 20 43. Wheeler DW, Degnan BA, Sehmi JS, et al. Variability in the concentrations of  
49 intravenous drug infusions prepared in a critical care unit. *Intensive Care Med*  
50  
51 21  
52  
53 22  
54  
55  
56  
57  
58  
59  
60



- 1  
2  
3 1 44. Moniz TT, Chu S, Tom C, et al. Sterile product compounding using an i.v. compounding  
4 workflow management system at a pediatric hospital. *Am J Health Syst Pharm*  
5  
6 2  
7  
8 3  
9  
10 4 45. Nguyen HT, Pham HT, Vo DK, et al. The effect of a clinical pharmacist-led training  
11 programme on intravenous medication errors: a controlled before and after study. *BMJ*  
12  
13 5  
14  
15 6  
16  
17 7 46. Niemann D, Bertsche A, Meyrath D, et al. A prospective three-step intervention study to  
18 prevent medication errors in drug handling in paediatric care. *J Clin Nurs* 2015;24:101-  
19  
20 8  
21  
22 9  
23  
24 10 47. Tavakoli-Ardakani M, Omidi S, Eshraghi A, et al. Medication errors in administration of  
25  
26 11  
27  
28  
29 12 48. Ding Q, Barker K, Flynn E, et al. Incidence of intravenous medication errors in a chinese  
30  
31 13  
32  
33  
34 14 49. Khalili H, Sheikhabayi M, Samadi N, et al. Bacterial contamination of single- and  
35  
36 15  
37  
38  
39 16  
40  
41 17 50. Aruna C, Nagaraju A, Swathi K, et al. Errors in the intravenous drug administration in  
42  
43 18  
44  
45  
46 19  
47  
48 20 51. Campino A, Arranz C, Unceta M, et al. Medicine preparation errors in ten Spanish  
49  
50 21  
51  
52  
53 22 52. Helder OK, Kornelisse RF, Reiss IK, et al. Disinfection practices in intravenous drug  
54  
55 23  
56  
57  
58  
59  
60

- 1  
2  
3 1 53. Rashed AN, Tomlin S, Aguado V, et al. Sources and magnitude of error in preparing  
4  
5 2 morphine infusions for nurse-patient controlled analgesia in a UK paediatric hospital. *Int*  
6  
7 3 *J Clin Pharm* 2016;38:1069-74.  
8  
9  
10 4 54. Reece KM, Lozano MA, Roux R, et al. Implementation and evaluation of a gravimetric  
11  
12 5 i.v. workflow software system in an oncology ambulatory care pharmacy. *Am J Health*  
13  
14 6 *Syst Pharm* 2016;73:165-73.  
15  
16  
17 7 55. Yin TS, Said MM, Rahman RA, et al. An investigation of errors: The preparation and  
18  
19 8 administration of parenteral medications in an intensive care unit of a tertiary teaching  
20  
21 9 hospital in Malaysia. *Int J Pharm Pharm Sci* 2016;8:325-29.  
22  
23  
24 10 56. Terkola R, Czejka M, Bérubé J. Evaluation of real-time data obtained from gravimetric  
25  
26 11 preparation of antineoplastic agents shows medication errors with possible critical  
27  
28 12 therapeutic impact: Results of a large-scale, multicentre, multinational, retrospective  
29  
30 13 study. *J Clin Pharm Ther* 2017:doi: 10.1111/jcpt.12529. [Epub ahead of print].  
31  
32  
33  
34 14 57. van den Heever A, Scribante J, Perrie H, et al. Microbial contamination and labelling of  
35  
36 15 self-prepared, multi-dose phenylephrine solutions used at a teaching hospital. *Southern*  
37  
38 16 *African Journal of Anaesthesia and Analgesia* 2016;22:175-79.  
39  
40  
41 17 58. Rich DS, Fricker MP, Jr., Cohen MR, et al. Guidelines for the safe preparation of sterile  
42  
43 18 compounds: results of the ISMP Sterile Preparation Compounding Safety Summit of  
44  
45 19 October 2011. *Hosp Pharm* 2013;48:282-94.  
46  
47  
48  
49 20  
50  
51  
52  
53  
54  
55  
56  
57  
58  
59  
60

1  
2  
3 **FIGURE TITLES AND LEGENDS**  
4

5  
6 **Figure 1. Intravenous Medication Use Cycle**  
7

8  
9 **Figure 2. PRISMA study inclusion flow diagram**  
10

11  
12 IV, intravenous; PRISMA, Preferred Reporting Items for Systematic Reviews and Meta-  
13 Analysis.  
14  
15  
16  
17  
18  
19  
20  
21  
22  
23  
24  
25  
26  
27  
28  
29  
30  
31  
32  
33  
34  
35  
36  
37  
38  
39  
40  
41  
42  
43  
44  
45  
46  
47  
48  
49  
50  
51  
52  
53  
54  
55  
56  
57  
58  
59  
60

For peer review only

1  
2  
3  
4  
5  
6  
7  
8  
9  
10  
11  
12  
13  
14  
15  
16  
17  
18  
19  
20  
21  
22  
23  
24  
25  
26  
27  
28  
29  
30  
31  
32  
33  
34  
35  
36  
37  
38  
39  
40  
41  
42  
43  
44  
45  
46  
47  
48  
49  
50  
51  
52  
53  
54  
55  
56  
57  
58  
59  
60

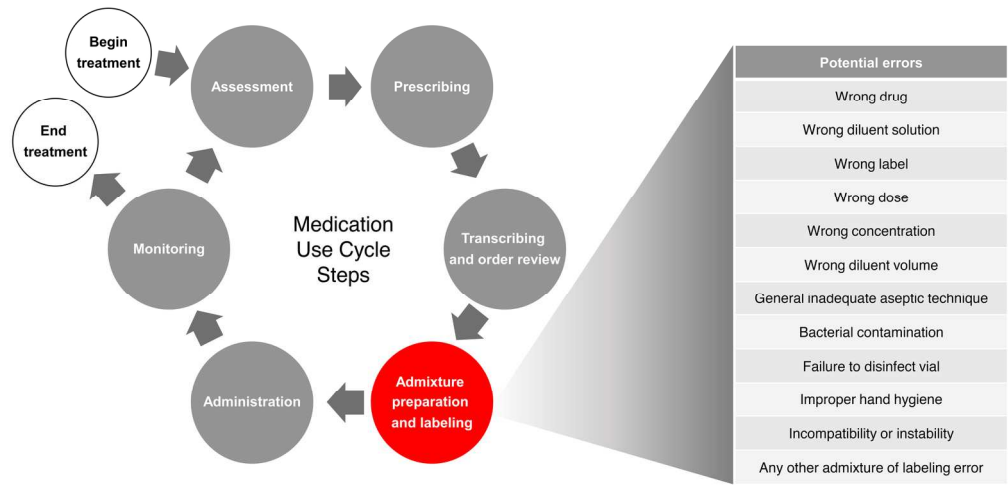

Figure 1. Intravenous medication use cycle

86x41mm (600 x 600 DPI)

For peer review only

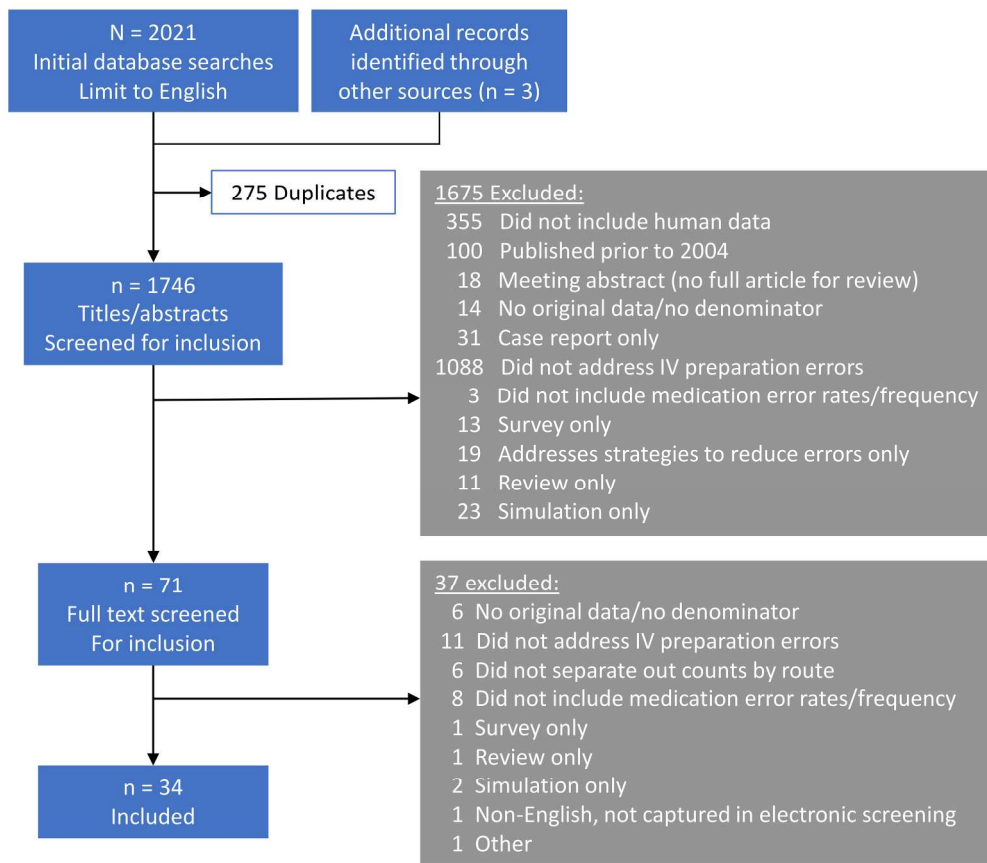

Figure 2. PRISMA study inclusion flow diagram

110x96mm (600 x 600 DPI)

only

1  
2  
3  
4  
5  
6  
7  
8  
9  
10  
11  
12  
13  
14  
15  
16  
17  
18  
19  
20  
21  
22  
23  
24  
25  
26  
27  
28  
29  
30  
31  
32  
33  
34  
35  
36  
37  
38  
39  
40  
41  
42  
43  
44  
45  
46  
47  
48  
49

**ONLINE SUPPLEMENTARY TABLES**

**Table S1. Systematic Review Search Terms**

| <b>Errors</b>                                                                                                                | <b>Route of Administration</b>                                                        | <b>Compounding</b>                                                                                                                                                                                                                                                | <b>Article Type</b>                                                                                                                                                                                                                                                                                                                                  |
|------------------------------------------------------------------------------------------------------------------------------|---------------------------------------------------------------------------------------|-------------------------------------------------------------------------------------------------------------------------------------------------------------------------------------------------------------------------------------------------------------------|------------------------------------------------------------------------------------------------------------------------------------------------------------------------------------------------------------------------------------------------------------------------------------------------------------------------------------------------------|
| ([Medication* or drug* or pharmaceutical* or medical or infus*] adj5 error*).mp.                                             | parenteral<br>OR<br>intravenous                                                       | Compounding<br>OR<br>Compounded                                                                                                                                                                                                                                   | (clinical trial or randomized controlled trial or controlled clinical trial or multicenter study or phase 1 clinical trial or phase 2 clinical trial or phase 3 clinical trial or phase 4 clinical trial) (EMBASE limits)                                                                                                                            |
| OR<br>(Adverse adj5 [event* or reaction*]).mp.                                                                               | OR<br>catheter*<br>OR                                                                 | OR<br>Reconstitut*                                                                                                                                                                                                                                                | OR<br>(Evidence based medicine or consensus development or meta-analysis or outcomes research or "systematic review")                                                                                                                                                                                                                                |
| OR<br>([Medication* or drug* or pharmaceutical*] adj5 [contamina* or safety or incompatib*]).mp.                             | OR<br>infus*<br>OR<br>iv                                                              | Admix*<br>OR<br>(Prepar* adj5 (pharmacy or pharmacies or pharmacist or pharmaceutical* or drug* or medication* or ward or wards or nurs* or chemotherapy* or antineoplastic* or cytostatic* or nutrition* or mixture* or solution* or compound or compounds)).mp. | (EMBASE limits)<br>OR<br>(Clinical trial, all or clinical trial, phase I or clinical trial, phase II or clinical trial, phase III or clinical trial, phase IV or clinical trial or comparative study or controlled clinical trial or meta-analysis or multicenter study or observational study or randomized controlled trial or systematic reviews) |
| OR<br>(Overdos* or over dose*).mp.                                                                                           | OR<br>intraocular<br>OR<br>intravitreal<br>OR                                         | OR<br>wards or nurs* or chemotherapy* or antineoplastic* or cytostatic* or nutrition* or mixture* or solution* or compound or compounds)).mp.                                                                                                                     | (Medline limits)<br>OR                                                                                                                                                                                                                                                                                                                               |
| OR<br>Near miss.mp. OR<br>(incident or incidents or accident*).mp.                                                           | OR<br>intramuscular<br>OR<br>subcutaneous<br>OR                                       | OR<br>antineoplastic* or cytostatic* or nutrition* or mixture* or solution* or compound or compounds)).mp.                                                                                                                                                        | (Chart review* or observational or systematic or prospective or cohort or retrospective or controlled study or controlled studies or controlled trial* or cross sectional or evidence based or direct observation* or audit or audits or randomized or blind or blinded or case series).mp.                                                          |
| OR<br>(Steril* or unsteril* or septic or sepsis or aseptic or asepsis).mp.                                                   | OR<br>epidural<br>OR<br>intraosseous<br>OR                                            |                                                                                                                                                                                                                                                                   | (free text terms)                                                                                                                                                                                                                                                                                                                                    |
| OR<br>([Healthcare or health care or hospital or bloodstream or blood stream or cross] adj3 infection*).mp.                  | OR<br>intraperitoneal<br>OR<br>(ei or im or io or os or ip or iv or pa).fs. use emefd |                                                                                                                                                                                                                                                                   |                                                                                                                                                                                                                                                                                                                                                      |
| OR<br>patient safety.mp.                                                                                                     |                                                                                       |                                                                                                                                                                                                                                                                   |                                                                                                                                                                                                                                                                                                                                                      |
| OR<br>([Drug or medication* or pharmaceutical*] adj3 [stor*or stability or stable or instability or unstable or expir*]).mp. |                                                                                       |                                                                                                                                                                                                                                                                   |                                                                                                                                                                                                                                                                                                                                                      |
| OR<br>([Wrong* or incorrect* or inappropriate* or error* or                                                                  |                                                                                       |                                                                                                                                                                                                                                                                   |                                                                                                                                                                                                                                                                                                                                                      |

1  
2  
3  
4 inaccura\* or deviation\*]  
5 adj5 (dose\* or dosage\* or  
6 drug\* or medication\* or  
7 pharmaceutical\* or  
8 concentration\* or diluent\*  
9 or dilution\* or strength\* or  
10 calculat\* or volume or  
11 label\* or product\* or  
12 quantit\*).mp.  
13 OR  
14 (Missing label\* or "no  
15 label\*" or "not label\*).mp.  
16 OR  
17 particulate\*.mp.  
18  
19  
20  
21  
22  
23  
24  
25  
26  
27  
28  
29  
30  
31  
32  
33  
34  
35  
36  
37  
38  
39  
40  
41  
42  
43  
44  
45  
46  
47  
48  
49

For peer review only

1  
2  
3  
4  
5  
6  
7  
8  
9  
10  
11  
12  
13  
14  
15  
16  
17  
18  
19  
20  
21  
22  
23  
24  
25  
26  
27  
28  
29  
30  
31  
32  
33  
34  
35  
36  
37  
38  
39  
40  
41  
42  
43  
44  
45  
46  
47  
48  
49

**Table S2. Details of Hawker Analysis**

|                         | <b>Abstract and Title</b> | <b>Introduction and Aims</b> | <b>Method and Data</b> | <b>Sampling</b> | <b>Data Analysis</b> | <b>Ethics and Bias</b> | <b>Results</b> | <b>Transferability or Generalizability</b> | <b>Implications and Usefulness</b> | <b>Average Score</b> | <b>Overall Quality</b> |
|-------------------------|---------------------------|------------------------------|------------------------|-----------------|----------------------|------------------------|----------------|--------------------------------------------|------------------------------------|----------------------|------------------------|
| Anselmi et al. 2007[1]  | 2                         | 2                            | 1                      | 3               | 1                    | 2                      | 2              | 3                                          | 3                                  | 2                    | <b>Fair</b>            |
| Aruna et al. 2015[2]    | 2                         | 3                            | 3                      | 3               | 2                    | 3                      | 3              | 3                                          | 4                                  | 3                    | <b>Poor</b>            |
| Bertsche et al. 2008[3] | 3                         | 3                            | 3                      | 2               | 1                    | 2                      | 2              | 2                                          | 2                                  | 2                    | <b>Fair</b>            |
| Campino et al. 2016[4]  | 2                         | 1                            | 1                      | 1               | 1                    | 3                      | 1              | 2                                          | 2                                  | 2                    | <b>Fair</b>            |
| Castagne et al. 2011[5] | 2                         | 1                            | 1                      | 3               | 4                    | 4                      | 1              | 3                                          | 1                                  | 2                    | <b>Fair</b>            |
| Cousins et al. 2005[6]  | 1                         | 2                            | 1                      | 3               | 3                    | 2                      | 2              | 3                                          | 2                                  | 2                    | <b>Fair</b>            |
| Crill et al. 2010[7]    | 1                         | 1                            | 1                      | 2               | 1                    | 1                      | 2              | 1                                          | 2                                  | 2                    | <b>Fair</b>            |
| Dehmel et al. 2011[8]   | 1                         | 1                            | 2                      | 3               | 1                    | 1                      | 2              | 3                                          | 2                                  | 1                    | <b>Good</b>            |
| Ding et al. 2015[9]     | 1                         | 2                            | 1                      | 1               | 2                    | 2                      | 1              | 3                                          | 1                                  | 2                    | <b>Fair</b>            |
| Fahimi et al. 2007[10]  | 2                         | 2                            | 2                      | 3               | 4                    | 2                      | 3              | 3                                          | 1                                  | 2                    | <b>Fair</b>            |
| Fahimi et al. 2008[11]  | 1                         | 1                            | 2                      | 3               | 3                    | 2                      | 2              | 3                                          | 1                                  | 2                    | <b>Fair</b>            |
| Helder et al. 2016[12]  | 3                         | 2                            | 1                      | 1               | 2                    | 2                      | 1              | 2                                          | 3                                  | 2                    | <b>Fair</b>            |
| Hoefel et al. 2006[13]  | 2                         | 2                            | 3                      | 1               | 2                    | 1                      | 2              | 2                                          | 2                                  | 2                    | <b>Fair</b>            |



1  
2  
3  
4  
5  
6  
7  
8  
9  
10  
11  
12  
13  
14  
15  
16  
17  
18  
19  
20  
21  
22  
23  
24  
25  
26  
27  
28  
29  
30  
31  
32  
33  
34  
35  
36  
37  
38  
39  
40  
41  
42  
43  
44  
45  
46  
47  
48  
49

|                                    |   |   |   |   |   |   |   |   |   |   |   |      |
|------------------------------------|---|---|---|---|---|---|---|---|---|---|---|------|
| Khalili et al. 2013[14]            | 2 | 2 | 2 | 3 | 3 | 4 | 2 | 3 | 3 | 3 | 3 | Poor |
| Macias et al 2005[15]              | 2 | 1 | 1 | 1 | 1 | 2 | 1 | 1 | 3 | 1 | 1 | Good |
| MacKay et al. 2009[16]             | 2 | 2 | 3 | 4 | 4 | 4 | 3 | 3 | 2 | 3 | 3 | Poor |
| Masini et al. 2014[17]             | 2 | 2 | 3 | 2 | 1 | 4 | 2 | 2 | 3 | 2 | 2 | Fair |
| Moniz et al. 2014[18]              | 1 | 1 | 2 | 3 | 3 | 4 | 2 | 3 | 3 | 2 | 2 | Fair |
| Nguyen et al. 2014[19]             | 1 | 1 | 1 | 2 | 1 | 2 | 1 | 2 | 1 | 1 | 1 | Good |
| Niemann et al. 2015[20]            | 1 | 1 | 1 | 1 | 1 | 2 | 2 | 2 | 2 | 1 | 1 | Good |
| Ong et al. 2013[21]                | 2 | 2 | 2 | 3 | 1 | 4 | 2 | 3 | 2 | 2 | 2 | Fair |
| Parshuram et al. 2006[22]          | 2 | 2 | 1 | 1 | 1 | 2 | 1 | 2 | 2 | 1 | 1 | Good |
| Rashed et al. 2016[23]             | 1 | 2 | 2 | 3 | 2 | 3 | 1 | 3 | 2 | 2 | 2 | Fair |
| Reece et al. 2016[24]              | 1 | 1 | 1 | 2 | 3 | 3 | 1 | 2 | 2 | 2 | 2 | Fair |
| Rodriguez-Gonzalez et al. 2012[25] | 2 | 1 | 1 | 3 | 2 | 2 | 2 | 3 | 2 | 2 | 2 | Fair |
| Sacks et al. 2009[26]              | 1 | 1 | 1 | 3 | 3 | 1 | 2 | 3 | 2 | 2 | 2 | Fair |
| Seger et al. 2012[27]              | 1 | 2 | 1 | 3 | 1 | 1 | 1 | 3 | 2 | 2 | 2 | Fair |

1  
2  
3  
4  
5  
6  
7  
8  
9  
10  
11  
12  
13  
14  
15  
16  
17  
18  
19  
20  
21  
22  
23  
24  
25  
26  
27  
28  
29  
30  
31  
32  
33  
34  
35  
36  
37  
38  
39  
40  
41  
42  
43  
44  
45  
46  
47  
48  
49

|                                    |   |   |   |   |   |   |   |   |   |   |             |
|------------------------------------|---|---|---|---|---|---|---|---|---|---|-------------|
| Skouroliakou et al. 2005[28]       | 2 | 2 | 2 | 4 | 4 | 4 | 2 | 3 | 3 | 3 | <b>Poor</b> |
| Tavakoli-Ardakani et al. 2013[29]* | 2 | 3 | 2 | 3 | 2 | 3 | 0 | 3 | 2 | 2 | <b>Fair</b> |
| Terkola et al. 2017[30]            | 1 | 1 | 2 | 3 | 4 | 2 | 2 | 3 | 2 | 2 | <b>Fair</b> |
| van den Heever et al. 2016[31]     | 1 | 1 | 1 | 2 | 2 | 3 | 1 | 2 | 1 | 2 | <b>Fair</b> |
| Westbrook et al. 2011[32]          | 2 | 1 | 3 | 3 | 2 | 2 | 2 | 3 | 1 | 2 | <b>Fair</b> |
| Wheeler et al. 2008[33]            | 1 | 3 | 2 | 3 | 1 | 4 | 2 | 3 | 1 | 2 | <b>Fair</b> |
| Yin et al. 2016[34]                | 2 | 1 | 1 | 2 | 2 | 2 | 1 | 2 | 2 | 2 | <b>Fair</b> |

Studies are rated as good (1), fair (2), poor (3), or very poor (4) for each of the Hawker criteria, and given an overall score based on the average rating across all criteria.

\*This study could not be fully evaluated due to a missing table in the available publication.

Table S3. Study Characteristics

| Study                   | Geographical Location(s) | Centers, n | Patient Population                      | Study Design | Observational Technique                                                               | Type of Intravenous Admixture | Location of Intravenous Admixture Preparation | Method of Intravenous Admixture Preparation | Patient Impact Measured (Yes / No) |
|-------------------------|--------------------------|------------|-----------------------------------------|--------------|---------------------------------------------------------------------------------------|-------------------------------|-----------------------------------------------|---------------------------------------------|------------------------------------|
| Anselmi et al. 2007[1]  | Brazil                   | 3          | General inpatient units                 | Single arm   | Direct observation                                                                    | Multiple IV therapies         | Nursing ward                                  | Manual                                      | No                                 |
| Aruna et al. 2015[2]    | India                    | 1          | General inpatient units                 | Single arm   | Chart review                                                                          | Multiple IV therapies         | Not specified                                 | Manual                                      | No                                 |
| Bertsche et al. 2008[3] | Germany                  | 1          | General inpatient units and ICU         | Single arm   | Direct observation                                                                    | Multiple IV therapies         | Nursing ward                                  | Manual                                      | Yes                                |
| Campino et al. 2016[4]  | Spain                    | 11         | NICU                                    | Comparative  | Final concentration of admixture                                                      | Multiple IV therapies         | Central pharmacy vs nursing ward              | Manual                                      | No                                 |
| Castagne et al. 2011[5] | France                   | 1          | Oncology inpatients                     | Single arm   | Final concentration of admixture                                                      | Chemotherapy                  | Central pharmacy                              | Automated                                   | No                                 |
| Cousins et al. 2005[6]  | France<br>Germany<br>UK  | 3          | General medical and surgical inpatients | Single arm   | Direct observation (participants in France and Germany were blinded to study purpose) | Multiple IV therapies         | Nursing ward                                  | Manual                                      | No                                 |
| Crill et al. 2010[7]    | US                       | 1          | Critical care (NICU)                    | Single arm   | Bacterial culture                                                                     | Intravenous fat emulsion      | Central pharmacy                              | Manual                                      | Yes                                |
| Dehmel et al. 2011[8]   | Germany                  | 1          | Critical care (ICU)                     | Comparative  | Final concentration of admixture                                                      | Multiple IV therapies         | Central pharmacy vs nursing ward              | Automated vs manual                         | No                                 |
| Ding et al. 2015[9]     | China                    | 1          | General surgery inpatients              | Single arm   | Direct observation                                                                    | Multiple IV therapies         | Nursing ward                                  | Manual                                      | Yes                                |
| Fahimi et al. 2007[10]  | Iran                     | 1          | Critical care (ICU)                     | Single arm   | Direct observation                                                                    | Multiple IV therapies         | Nursing ward                                  | Manual                                      | Yes                                |
| Fahimi et al. 2008[11]  | Iran                     | 1          | Critical care (ICU)                     | Single arm   | Direct observation                                                                    | Multiple IV therapies         | Nursing ward                                  | Manual                                      | Yes                                |

1  
2  
3  
4  
5  
6  
7  
8  
9  
10  
11  
12  
13  
14  
15  
16  
17  
18  
19  
20  
21  
22  
23  
24  
25  
26  
27  
28  
29  
30  
31  
32  
33  
34  
35  
36  
37  
38  
39  
40  
41  
42  
43  
44  
45  
46  
47  
48  
49

|                           |             |   |                                                               |                |                                                                                                        |                       |                                   |                     |     |
|---------------------------|-------------|---|---------------------------------------------------------------|----------------|--------------------------------------------------------------------------------------------------------|-----------------------|-----------------------------------|---------------------|-----|
| Helder et al. 2016[12]    | Netherlands | 1 | NICU, PICU, and general pediatric wards                       | Interventional | Direct observation                                                                                     | Multiple IV therapies | Nursing ward                      | Manual              | No  |
| Hoefel et al. 2006[13]    | Brazil      | 1 | General units and ICU                                         | Single arm     | Direct observation                                                                                     | Antibiotic (cefepime) | Nursing ward                      | Manual              | No  |
| Khalili et al. 2013[14]   | Iran        | 3 | Adult and pediatric inpatients                                | Comparative    | Bacterial culture                                                                                      | Multiple IV therapies | Central pharmacy vs nursing ward  | Manual              | No  |
| Macias et al. 2005[15]    | Mexico      | 1 | Critical care (NICU)                                          | Single arm     | Bacterial culture                                                                                      | Multiple IV therapies | Nursing ward                      | Manual              | No  |
| MacKay et al. 2009[16]    | US          | 1 | Pediatric trauma unit                                         | Interventional | Cross-check                                                                                            | Multiple IV therapies | Central pharmacy                  | Automated           | No  |
| Masini et al. 2014[17]    | Italy       | 1 | Inpatient and outpatient oncology                             | Comparative    | Final concentration of admixture                                                                       | Chemotherapy          | Central pharmacy                  | Automated vs manual | No  |
| Moniz et al. 2014[18]     | US          | 1 | Pediatric inpatients                                          | Single arm     | Direct observation; Pharmacists reviewed digital photos of each preparation step via a web application | Multiple IV therapies | Central pharmacy                  | Automated           | Yes |
| Nguyen et al. 2014[19]    | Vietnam     | 1 | Critical care (ICU / PSU)                                     | Interventional | Direct observation (participants were blinded to study purpose)                                        | Multiple IV therapies | Not specified                     | Manual              | Yes |
| Niemann et al. 2015[20]   | Germany     | 1 | Pediatric inpatients                                          | Interventional | Direct observation                                                                                     | Multiple IV therapies | Not specified                     | Manual              | Yes |
| Ong et al. 2013[21]       | Malaysia    | 1 | General and acute care, adult and pediatric inpatients        | Single arm     | Direct observation                                                                                     | Multiple IV therapies | Nursing ward                      | Manual              | No  |
| Parshuram et al. 2006[22] | Canada      | 1 | Pediatric oncology (not specified if inpatient or outpatient) | Single arm     | Final concentration of admixture                                                                       | Chemotherapy          | Not specified                     | Not specified       | No  |
| Rashed et al. 2016[23]    | UK          | 1 | Pediatric inpatients                                          | Comparative    | Direct observation and final concentration of infusion                                                 | Morphine              | Nursing ward vs operating theater | Manual              | No  |

|    |                 |                |    |                     |                |                            |                  |                   |               |     |
|----|-----------------|----------------|----|---------------------|----------------|----------------------------|------------------|-------------------|---------------|-----|
| 1  |                 |                |    |                     |                |                            |                  |                   |               |     |
| 2  |                 |                |    |                     |                |                            |                  |                   |               |     |
| 3  |                 |                |    |                     |                |                            |                  |                   |               |     |
| 4  | Reece et al.    | US             | 1  | Oncology            | Comparative    | Error reports (self-       | Chemotherapy     | Central pharmacy  | Manual        | No  |
| 5  | 2016[24]        |                |    | outpatients         |                | reported and automated)    |                  |                   |               |     |
| 6  | Rodriguez-      | Spain          | 1  | Gastroenterology    | Single arm     | Direct observation         | Multiple IV      | Not specified     | Not specified | Yes |
| 7  | Gonzalez et al. |                |    | inpatients          |                | (participants were blinded | therapies        |                   |               |     |
| 8  | 2012[25]        |                |    |                     |                | to study purpose)          |                  |                   |               |     |
| 9  |                 |                |    |                     |                |                            |                  |                   |               |     |
| 10 | Sacks et al.    | US             | 1  | General adult and   | Single arm     | Incident reports           | Total parenteral | Central pharmacy  | Automated     | Yes |
| 11 | 2009[26]        |                |    | pediatric inpatient |                |                            | nutrition        |                   |               |     |
| 12 |                 |                |    | units and ICU       |                |                            |                  |                   |               |     |
| 13 | Seger et al.    | US             | 1  | Oncology inpatients | Comparative    | Direct observation         | Chemotherapy     | Central pharmacy  | Automated     | Yes |
| 14 | 2012[27]        |                |    |                     |                |                            |                  |                   | vs            |     |
| 15 |                 |                |    |                     |                |                            |                  |                   | manual        |     |
| 16 | Skouroliakou    | Greece         | 1  | Neonatal inpatients | Comparative    | Cross-check and direct     | Total parenteral | Not specified     | Automated     | No  |
| 17 | et al. 2005[28] |                |    |                     |                | observation                | nutrition        |                   | vs            |     |
| 18 |                 |                |    |                     |                |                            |                  |                   | manual        |     |
| 19 | Tavakoli-       | Iran           | 1  | Hematology and      | Single arm     | Direct observation         | Chemotherapy     | Nursing ward      | Manual        | No  |
| 20 | Ardakani et al. |                |    | oncology inpatients |                |                            |                  |                   |               |     |
| 21 | 2013[29]        |                |    | and outpatients     |                |                            |                  |                   |               |     |
| 22 |                 |                |    |                     |                |                            |                  |                   |               |     |
| 23 | Terkola et al.  | Austria        | 10 | Oncology            | Single arm     | Incident reports           | Chemotherapy     | Offsite pharmacy  | Not specified | No  |
| 24 | 2017[30]        | Czech Republic |    |                     |                |                            |                  |                   |               |     |
| 25 |                 | Denmark        |    |                     |                |                            |                  |                   |               |     |
| 26 |                 | Germany        |    |                     |                |                            |                  |                   |               |     |
| 27 |                 | Switzerland    |    |                     |                |                            |                  |                   |               |     |
| 28 | van den         | South Africa   | 1  | Obstetric surgery   | Single arm     | Bacterial culture          | Phenylephrine    | Obstetric theater | Manual        | No  |
| 29 | Heever et al.   |                |    |                     |                |                            |                  |                   |               |     |
| 30 | 2016[31]        |                |    |                     |                |                            |                  |                   |               |     |
| 31 |                 |                |    |                     |                |                            |                  |                   |               | Yes |
| 32 | Westbrook et    | Australia      | 2  | General and         | Single arm     | Direct observation         | Multiple IV      | Nursing ward      | Manual        |     |
| 33 | al. 2011[32]    |                |    | surgical inpatients |                |                            | therapies        |                   |               |     |
| 34 |                 |                |    |                     |                |                            |                  |                   |               |     |
| 35 | Wheeler et al.  | UK             | 1  | Critical care       | Interventional | Cross-check                | Multiple IV      | Nursing ward      | Manual        | No  |
| 36 | 2008[33]        |                |    | (neurological)      |                |                            | therapies        |                   |               |     |
| 37 |                 |                |    | inpatients          |                |                            |                  |                   |               |     |
| 38 | Yin et al.      | Malaysia       | 1  | Critical care (ICU) | Single arm     | Direct observation         | Multiple IV      | Nursing ward      | Manual        | No  |
| 39 | 2016[34]        |                |    |                     |                |                            | therapies        |                   |               |     |
| 40 |                 |                |    |                     |                |                            |                  |                   |               |     |

Method of preparation was assumed to be manual for studies in which IV admixture preparation occurred in the nursing ward, and no other information regarding method of preparation was provided. ICU, intensive care unit; IV, intravenous; NICU, neonatal intensive care unit; PSU, post-surgical unit; UK, United Kingdom; US, United States.

**Table S4. Patient Burden of Harm**

| Study                                                             | Error Types                                                                                     | Burden of Harm                                                                                                                                                                                                                                                                                                                                                                                                                                                                     |
|-------------------------------------------------------------------|-------------------------------------------------------------------------------------------------|------------------------------------------------------------------------------------------------------------------------------------------------------------------------------------------------------------------------------------------------------------------------------------------------------------------------------------------------------------------------------------------------------------------------------------------------------------------------------------|
| NCC MERP Medication Error Index Definition of Error Severity      |                                                                                                 |                                                                                                                                                                                                                                                                                                                                                                                                                                                                                    |
| <b>Fahimi et al. 2007[10]</b>                                     | Wrong drug<br>Wrong label<br>Wrong dose                                                         | All observed errors were rated NCC MERP Index Category B ("An error occurred but the error did not reach the patient.")                                                                                                                                                                                                                                                                                                                                                            |
| <b>Rodriguez-Gonzalez et al. 2012[25]</b>                         | Wrong diluent solution<br>Wrong diluent volume                                                  | <ul style="list-style-type: none"> <li>Severity was defined according to updated medication errors taxonomy adapted from NCC MERP definitions.[35]</li> <li>Severity of wrong preparation errors (reconstitution and dilution) were determined to have the potential to cause "no damage."</li> </ul>                                                                                                                                                                              |
| <b>Sacks et al. 2009[26]</b>                                      | Composite                                                                                       | <p>Severity of errors was defined according to the NCC MERP Index:</p> <ul style="list-style-type: none"> <li>91% of errors did not cause harm (Categories B–D)</li> <li>15% of errors were "near misses" (Categories A–B)</li> <li>8% of errors contributed to or resulted in temporary harm (Categories E–F)</li> </ul> <p>No errors resulted in permanent harm, near death, or death (Categories G–I)</p>                                                                       |
| Clinician Assessment or Expert Panel Definition of Error Severity |                                                                                                 |                                                                                                                                                                                                                                                                                                                                                                                                                                                                                    |
| <b>Bertsche et al. 2008[3]</b>                                    | Inadequate aseptic technique                                                                    | <ul style="list-style-type: none"> <li>A multidisciplinary committee for quality assurance established risk scores for medical errors.</li> <li>Errors were assigned a risk score weighted by potential risk of the drug involved and the characteristics of the error (low risk = 0.5, moderate risk = 1, high risk = 2).</li> <li>Rates of error by severity were reported for all types of administration combined (IV, oral, and gastric tube), but not separately.</li> </ul> |
| <b>Moniz et al. 2014[18]</b>                                      | Wrong dose<br>Wrong drug<br>Wrong diluent solution<br>Inadequate aseptic technique<br>Composite | <p>A new workflow was implemented that detected IV preparation errors that would not have been detected previously. These new errors (n = 447) were rated:</p> <ul style="list-style-type: none"> <li>Little potential for harm: 62.64%</li> <li>Potential ADE with moderate harm: 32.66%</li> <li>Potential ADE with severe harm: 4.70%</li> </ul>                                                                                                                                |
| <b>Nguyen et al. 2014[19]</b>                                     | Wrong drug                                                                                      | <p>Clinical relevance of each dose with <math>\geq 1</math> error was rated on a validated scale ranging from 0 (no harm) to 10 (death) by a panel of healthcare providers, and was categorized as follows:</p> <ul style="list-style-type: none"> <li>Minor outcome: 0–2</li> </ul>                                                                                                                                                                                               |

**Table S4. Patient Burden of Harm**

| Study                                            | Error Types                  | Burden of Harm                                                                                                                                                                                                                                                                                                                                                                           |
|--------------------------------------------------|------------------------------|------------------------------------------------------------------------------------------------------------------------------------------------------------------------------------------------------------------------------------------------------------------------------------------------------------------------------------------------------------------------------------------|
|                                                  | Wrong dose                   | <ul style="list-style-type: none"> <li>Moderate outcome: 3–7</li> <li>Severe outcome: 8–10</li> </ul>                                                                                                                                                                                                                                                                                    |
|                                                  | Composite                    | Moderate and severe outcomes were considered clinically relevant (57.9% to 64.0% of errors across the 2 study wards).                                                                                                                                                                                                                                                                    |
| <b>Niemann et al. 2014[20]</b>                   | Wrong diluent solution       | Clinical relevance of error subcategories was rated by an expert panel on a four-point scale:                                                                                                                                                                                                                                                                                            |
|                                                  |                              | 1. No clinical relevance                                                                                                                                                                                                                                                                                                                                                                 |
|                                                  |                              | 2. Minor clinical relevance                                                                                                                                                                                                                                                                                                                                                              |
|                                                  | Wrong diluent volume         | 3. Clinical relevance                                                                                                                                                                                                                                                                                                                                                                    |
|                                                  |                              | 4. High clinical relevance                                                                                                                                                                                                                                                                                                                                                               |
|                                                  | Composite                    | The frequency of each level of severity combined oral and IV drug errors.                                                                                                                                                                                                                                                                                                                |
| <b>Seger et al. 2012[27]</b>                     | Wrong drug                   | <ul style="list-style-type: none"> <li>Severity was rated as life-threatening, severe, significant, or little-to-no harm.</li> <li>Events with potential for little-to-no harm were not included in the analysis.</li> <li>There were no potentially life-threatening events, and the remaining events were approximately evenly distributed between significant and serious.</li> </ul> |
|                                                  | Wrong concentration          | Doses with $\pm 5\%$ to 10% variance were considered to have little to no potential for harm. Those with variance $> \pm 10\%$ were rated serious and potentially harmful.                                                                                                                                                                                                               |
| <b>Westbrook et al. 2011[32]</b>                 | Wrong drug                   | <ul style="list-style-type: none"> <li>Severity was rated on a scale from 1 ("Incident is likely to have little to no effect on the patient") to 5 ("Incident is likely to lead to death"), with ratings of 1 to 2 considered minor errors and 3 to 5 considered serious errors.</li> <li>25.5% of overall errors were rated as serious.</li> </ul>                                      |
|                                                  | Wrong diluent solution       | • 23.8% of wrong diluent solution errors were rated as serious.                                                                                                                                                                                                                                                                                                                          |
|                                                  | Wrong diluent volume         | • 17.4% of wrong diluent volume errors were rated as serious.                                                                                                                                                                                                                                                                                                                            |
| Other Method for Determination of Error Severity |                              |                                                                                                                                                                                                                                                                                                                                                                                          |
| <b>Crill et al. 2010[7]</b>                      | Inadequate aseptic technique | <ul style="list-style-type: none"> <li>Severity of errors was not rated.</li> <li>Authors noted that no cases of systemic infection arose from syringes that had positive cultures.</li> </ul>                                                                                                                                                                                           |
|                                                  | Bacterial contamination      |                                                                                                                                                                                                                                                                                                                                                                                          |
| <b>Ding et al. 2015[9]</b>                       | Wrong dose                   | <ul style="list-style-type: none"> <li>An error was considered clinically important if it concerned a drug listed in the ISMP list of high-alert medications (2008).</li> <li>81% of TPN dose errors involved ISMP high-alert medications.</li> </ul>                                                                                                                                    |

1  
2  
3  
4  
5  
6  
7  
8  
9  
10  
11  
12  
13  
14  
15  
16  
17  
18  
19  
20  
21  
22  
23  
24  
25  
26  
27  
28  
29  
30  
31  
32  
33  
34  
35  
36  
37  
38  
39  
40  
41  
42  
43  
44  
45  
46  
47  
48  
49

**Table S4. Patient Burden of Harm**

| Study                         | Error Types            | Burden of Harm                                                                                                                                       |
|-------------------------------|------------------------|------------------------------------------------------------------------------------------------------------------------------------------------------|
|                               | Composite              | An error was considered clinically important if it concerned a drug listed in the ISMP list of high-alert medications (2008).                        |
| <b>Fahimi et al. 2008[11]</b> | Wrong diluent solution | There was no severity rating system, but the authors note that none of the errors identified resulted in adverse effects or major risks to patients. |
|                               | Wrong dose             |                                                                                                                                                      |

ADE, adverse drug event; ISMP, Institute for Safe Medication Practices; IV, intravenous; NCC MERP, National Coordinating Council for Medication Error Reporting and Prevention; TPN, total parenteral nutrition.



**Table S5. Error Incidence Definitions**

| Admixture Preparation and Labeling Error Types | Definitions                                                                                                                                                                                                                                                                             | Study                                                                                                                                                                                |
|------------------------------------------------|-----------------------------------------------------------------------------------------------------------------------------------------------------------------------------------------------------------------------------------------------------------------------------------------|--------------------------------------------------------------------------------------------------------------------------------------------------------------------------------------|
| <b>Component Error</b>                         |                                                                                                                                                                                                                                                                                         |                                                                                                                                                                                      |
| Wrong Drug                                     | An IV drug was prepared or administered that differed from the one that was prescribed                                                                                                                                                                                                  | Anselmi et al. 2007[1] Cousins et al. 2005[6] Moniz et al. 2014[18] Nguyen et al. 2014[19] Ong et al. 2013[21] Reece et al. 2016[24] Seger et al. 2012[27] Westbrook et al. 2011[32] |
|                                                | An unauthorized IV drug was administered, or an order was changed, that was not found in the patient chart                                                                                                                                                                              | Fahimi et al. 2007[10]                                                                                                                                                               |
|                                                | An incorrect drug or dosage form was selected                                                                                                                                                                                                                                           | Yin et al. 2016[34]                                                                                                                                                                  |
| Wrong Diluent Solution                         | An IV drug was prepared or administered with a diluent that was not compatible with drug and volume to achieve the correct concentration                                                                                                                                                | Cousins et al. 2005[6]                                                                                                                                                               |
|                                                | An IV drug was prepared with the incorrect diluent based on any of the following: <ul style="list-style-type: none"> <li>• The manufacturer's instructions</li> <li>• Published drug preparation handbooks</li> <li>• Other internal or external drug preparation guidelines</li> </ul> | Fahimi et al. 2008[11] Niemann et al. 2015[20] Ong et al. 2013[21] Westbrook et al. 2011[32]                                                                                         |
|                                                | An IV drug was prepared with the incorrect diluent                                                                                                                                                                                                                                      | Moniz et al. 2014[18] Rashed et al. 2016[23] Reece et al. 2016[24]                                                                                                                   |
|                                                | The IV medication was reconstituted or diluted incorrectly according to medication errors taxonomy adapted from NCC MERP definitions [Otero Lopez 2008]                                                                                                                                 | Rodriguez-Gonzalez et al. 2012[25]                                                                                                                                                   |
| Wrong label                                    | An IV drug was prepared or administered with a missing or incomplete label with respect to drug name, dose, patient name, or preparation time                                                                                                                                           | Cousins et al. 2005[6]                                                                                                                                                               |
|                                                | The administration rate, patient identification, date, or time of infusion was not properly documented                                                                                                                                                                                  | Fahimi et al. 2007[10]                                                                                                                                                               |
|                                                | The IV drug label was incomplete with respect to patient, drug, dose, or preparation time, or the opened diluent vials were improperly labeled                                                                                                                                          | Ong et al. 2013[21]                                                                                                                                                                  |

|                                                                                                                                                                             |                                                                                                                                                                           |                                                                                                                                                        |
|-----------------------------------------------------------------------------------------------------------------------------------------------------------------------------|---------------------------------------------------------------------------------------------------------------------------------------------------------------------------|--------------------------------------------------------------------------------------------------------------------------------------------------------|
|                                                                                                                                                                             | Syringes or drug infusion containers were not labeled properly                                                                                                            | Yin et al. 2016[34]                                                                                                                                    |
|                                                                                                                                                                             | Label was incomplete or incorrect with regard to name of solution, concentration of solution, date of preparation, time or preparation, or healthcare worker's signature  | van den Heever et al. 2016[31]                                                                                                                         |
|                                                                                                                                                                             | The syringe label was illegible or missing the drug name, dose, concentration, diluent, patient name, patient location, preparer's initials, countersigned, date, or time | Wheeler et al. 2008[33]                                                                                                                                |
| <b>Dose or Calculation Error</b>                                                                                                                                            |                                                                                                                                                                           |                                                                                                                                                        |
| Wrong Dose                                                                                                                                                                  | An incorrect IV drug dose or infusion volume was prepared or administered                                                                                                 | Anselmi et al. 2007[1]<br>Cousins et al. 2005[6]<br>Fahimi et al. 2007[10]<br>Hoefel et al. 2006[13]<br>Moniz et al. 2014[18]<br>Reece et al. 2016[24] |
|                                                                                                                                                                             | The calculated concentration deviated by >10% of that prescribed                                                                                                          | Campino et al. 2016[4]                                                                                                                                 |
|                                                                                                                                                                             | An ingredient deviated > ±10% from the correct volume or concentration, a dose was omitted, or an extra dose was given                                                    | Ding et al. 2015[9]                                                                                                                                    |
|                                                                                                                                                                             | An IV drug that differed by ±10% of the prescribed dose was prepared                                                                                                      | Nguyen et al. 2014[19]                                                                                                                                 |
|                                                                                                                                                                             | An incorrect dose or diluent volume was calculated that differed from the manufacturer's instructions or published drug preparation handbooks                             | Fahimi et al. 2008[11]                                                                                                                                 |
| Wrong Concentration                                                                                                                                                         | The sampled IV drug preparation deviated by ±20% or more from its intended concentration                                                                                  | Castagne et al. 2011[5]                                                                                                                                |
|                                                                                                                                                                             | The sampled IV drug preparation deviated by ≥ ±5% or ≥ ±10% from its intended concentration                                                                               | Dehmel et al. 2011[8]<br>Masini et al. 2014[17]                                                                                                        |
|                                                                                                                                                                             | The sampled IV drug preparation deviated by ±10% or more from its intended concentration                                                                                  | Parshuram et al. 2006[22]                                                                                                                              |
|                                                                                                                                                                             | The sampled IV drug preparation deviated by more than ±10% from its intended concentration                                                                                | Campino et al. 2016[4]<br>Yin et al. 2016[34]                                                                                                          |
|                                                                                                                                                                             | The morphine infusion deviated from its target concentration beyond the pharmacopoeial limit for drug content of morphine sulphate injection (92.5–107.5%)                | Rashed et al. 2016[23]                                                                                                                                 |
|                                                                                                                                                                             | The sampled IV drug preparation deviated by ±5% or more from its intended concentration                                                                                   | Seger et al. 2012[27]                                                                                                                                  |
|                                                                                                                                                                             | The concentration of any of the individual components of total parenteral nutrition was calculated incorrectly                                                            | Skouroliakou et al. 2005[28]                                                                                                                           |
| The volume of the sampled IV drug preparation exceeded the gravimetric software's preset tolerance limit<br>• Tolerance levels were set by each site and ranged from 2.5–6% | Terkola et al. 2017[30]                                                                                                                                                   |                                                                                                                                                        |

|                              |                                                                                                                                                                                                                                                                                                                                                                 |                                                                                                   |
|------------------------------|-----------------------------------------------------------------------------------------------------------------------------------------------------------------------------------------------------------------------------------------------------------------------------------------------------------------------------------------------------------------|---------------------------------------------------------------------------------------------------|
|                              | An incorrect diluent volume was used                                                                                                                                                                                                                                                                                                                            | Cousins et al. 2005[6]<br>Hoefel et al. 2006[13]<br>Reece et al. 2016[24]                         |
| Wrong Diluent Volume         | An IV drug was prepared with an incorrect diluent volume based on any of the following: <ul style="list-style-type: none"> <li>• The manufacturer's instructions</li> <li>• The corresponding summaries of product characteristics</li> <li>• Published drug preparation handbooks</li> <li>• Other internal or external drug preparation guidelines</li> </ul> | Niemann et al. 2015[20]<br>Ong et al. 2013[21]<br>Westbrook et al. 2011[32]                       |
|                              | The IV medication was reconstituted or diluted incorrectly according to medication errors taxonomy adapted from NCC MERP definitions [Otero Lopez 2008]                                                                                                                                                                                                         | Rodriguez-Gonzalez et al. 2012[25]                                                                |
|                              | The total volume of the IV solution was incorrect                                                                                                                                                                                                                                                                                                               | Skouroliakou et al. 2005[28]                                                                      |
|                              | <b>Aseptic Technique Error</b>                                                                                                                                                                                                                                                                                                                                  |                                                                                                   |
| Inadequate Aseptic Technique | The IV drug was not prepared in accordance with local hygiene guidelines                                                                                                                                                                                                                                                                                        | Bertsche et al. 2008[3]                                                                           |
|                              | Sampling of repackaged syringes resulted in positive bacterial cultures                                                                                                                                                                                                                                                                                         | Crill et al. 2010[7]                                                                              |
|                              | Nonadherence to 1 or more of the following hygiene protocols: <ul style="list-style-type: none"> <li>• Hand disinfection by applying hand alcohol</li> <li>• Rubbing hands for 30 seconds</li> <li>• Using sterile gloves</li> <li>• Disinfecting the ampoule</li> <li>• Allowing the ampoule to dry for 30 seconds</li> </ul>                                  | Helder et al. 2016[12]                                                                            |
|                              | Aseptic technique was not followed during IV infusion preparation                                                                                                                                                                                                                                                                                               | Rashed et al. 2016[23]<br>Yin et al. 2016[34]                                                     |
|                              | Needles or syringes were left uncapped during IV preparation                                                                                                                                                                                                                                                                                                    | Moniz et al. 2014[18]                                                                             |
|                              | Bacterial Contamination                                                                                                                                                                                                                                                                                                                                         | Sampling of IV drug preparations resulted in positive bacterial cultures                          |
| Failure to Disinfect Vial    | Vial top or ampoule was not disinfected during preparation                                                                                                                                                                                                                                                                                                      | Cousins et al. 2005[6]<br>Helder et al. 2016[12]<br>Ong et al. 2013[21]<br>Rashed et al. 2016[23] |

1  
2  
3  
4  
5  
6  
7  
8  
9  
10  
11  
12  
13  
14  
15  
16  
17  
18  
19  
20  
21  
22  
23  
24  
25  
26  
27  
28  
29  
30  
31  
32  
33  
34  
35  
36  
37  
38  
39  
40  
41  
42  
43  
44  
45  
46  
47  
48  
49

|                                 |                                                                                                                                                                                                                                                                                                                                                            |                                               |
|---------------------------------|------------------------------------------------------------------------------------------------------------------------------------------------------------------------------------------------------------------------------------------------------------------------------------------------------------------------------------------------------------|-----------------------------------------------|
| Improper Hand Hygiene           | Hands were not washed, gloves were not worn, or nonsterile gloves were worn during IV drug preparation                                                                                                                                                                                                                                                     | Cousins et al. 2005[6]<br>Ong et al. 2013[21] |
|                                 | Gloves were not worn during IV infusion preparation                                                                                                                                                                                                                                                                                                        | Rashed et al. 2016[23]                        |
| <b>Composite Error</b>          |                                                                                                                                                                                                                                                                                                                                                            |                                               |
| Any Admixture or Labeling Error | An IV drug dose was prepared or administered differently from how it was prescribed by the physician in the patient's medical record with regard to:<br><ul style="list-style-type: none"> <li>• Wrong patient</li> <li>• Wrong drug</li> <li>• Wrong dose</li> <li>• Omitted dose</li> </ul>                                                              | Anselmi et al. 2007[1]                        |
|                                 | An IV drug was incorrectly formulated or manipulated before administration:<br><ul style="list-style-type: none"> <li>• Incorrect reconstitution or dilution</li> <li>• Physicochemical incompatibility of drugs mixed in the same container</li> <li>• Wrong pharmaceutical form</li> </ul>                                                               | Aruna et al. 2015[2]                          |
|                                 | Any of the following IV preparation or administration errors occurred:<br><ul style="list-style-type: none"> <li>• Unordered drug</li> <li>• Omitted drug</li> <li>• Wrong dose</li> <li>• Extra dose</li> <li>• Wrong route of administration</li> </ul>                                                                                                  | Ding et al. 2015[9]                           |
|                                 | A drip compounding error of greater than 1 standard deviation from the calculated value for each component in parenteral nutrition preparations occurred                                                                                                                                                                                                   | MacKay et al. 2009[16]                        |
|                                 | IV drug preparations in the institution were prepared and verified using an IV workflow manager system. Doses that were reworked or rejected were retrospectively reviewed for errors in:<br><ul style="list-style-type: none"> <li>• Preparation</li> <li>• Aseptic technique</li> <li>• Documentation</li> </ul>                                         | Moniz et al. 2014[18]                         |
|                                 | Any IV of the following IV preparation or administration errors occurred:<br><ul style="list-style-type: none"> <li>• Wrong drug</li> <li>• Wrong dose</li> <li>• Wrong dosage form</li> <li>• Deteriorated drug</li> <li>• Wrong preparation technique</li> <li>• Omission</li> <li>• Unordered drug</li> <li>• Wrong administration technique</li> </ul> | Nguyen et al. 2014[19]                        |
|                                 | At least 1 deviation from internal or external drug preparation or administration guidelines, corresponding summaries of product characteristics, or manufacturer recommendations occurred during the drug handling processes (eg, preparation, storage, labeling)                                                                                         | Niemann et al. 2015[20]                       |

1  
2  
3  
4  
5  
6  
7  
8  
9  
10  
11  
12  
13  
14  
15  
16  
17  
18  
19  
20  
21  
22  
23  
24  
25  
26  
27  
28  
29  
30  
31  
32  
33  
34  
35  
36  
37  
38  
39  
40  
41  
42  
43  
44  
45  
46  
47  
48  
49

|                                                                                                               |                                                                                                                                                                                                                                                                                                                                                                                                                               |                                          |
|---------------------------------------------------------------------------------------------------------------|-------------------------------------------------------------------------------------------------------------------------------------------------------------------------------------------------------------------------------------------------------------------------------------------------------------------------------------------------------------------------------------------------------------------------------|------------------------------------------|
|                                                                                                               | <p>Documented events in parenteral nutrition preparation or administration:</p> <ul style="list-style-type: none"> <li>• Dose omission</li> <li>• Extra dose</li> <li>• Prescription or refill delayed</li> <li>• Drug list incorrect</li> <li>• Monitoring error</li> <li>• Unauthorized drug</li> <li>• Inadequate pain management</li> <li>• Wrong events (eg, dose, drug, time, patient)</li> </ul>                       | <p>Sacks et al. 2009[26]</p>             |
|                                                                                                               | <p>A drug was prepared using the incorrect diluent or incorrect volume, or was not mixed properly</p>                                                                                                                                                                                                                                                                                                                         | <p>Yin et al. 2016[34]</p>               |
|                                                                                                               | <p>A deviation in handling, preparation, or administration of an IV drug occurred based on:</p> <ul style="list-style-type: none"> <li>• The manufacturer's instructions</li> <li>• <i>Handbook on Injectable Drugs</i>, 15th ed.</li> <li>• <i>Drug Information Handbook</i>, 19th ed.</li> <li>• American Society of Health-System Pharmacists Drug Information</li> <li>• <i>Oncology Nursing Drug Handbook</i></li> </ul> | <p>Tavakoli-Ardakani et al. 2013[29]</p> |
| <p>IV, intravenous; NCC MERP, National Coordinating Council for Medication Error Reporting and Prevention</p> |                                                                                                                                                                                                                                                                                                                                                                                                                               |                                          |

## References

1. Anselmi ML, Peduzzi M, Dos Santos CB. Errors in the administration of intravenous medication in Brazilian hospitals. *J Clin Nurs* 2007;16:1839-47.
2. Aruna C, Nagaraju A, Swathi K, et al. Errors in the intravenous drug administration in general medicine department of tertiary care teaching hospital. *Journal of Global Trends in Pharmaceutical Sciences* 2015;6:2628-34.
3. Bertsche T, Niemann D, Mayer Y, et al. Prioritising the prevention of medication handling errors. *Pharm World Sci* 2008;30:907-15.
4. Campino A, Arranz C, Unceta M, et al. Medicine preparation errors in ten Spanish neonatal intensive care units. *Eur J Pediatr* 2016;175:203-10.
5. Castagne V, Habert H, Abbara C, et al. Cytotoxics compounded sterile preparation control by HPLC during a 16-month assessment in a French university hospital: importance of the mixing bags step. *J Oncol Pharm Pract* 2011;17:191-6.
6. Cousins DH, Sabatier B, Begue D, et al. Medication errors in intravenous drug preparation and administration: a multicentre audit in the UK, Germany and France. *Qual Saf Health Care* 2005;14:190-5.
7. Crill CM, Hak EB, Robinson LA, et al. Evaluation of microbial contamination associated with different preparation methods for neonatal intravenous fat emulsion infusion. *Am J Health Syst Pharm* 2010;67:914-8.
8. Dehmel C, Braune SA, Kreyman G, et al. Do centrally pre-prepared solutions achieve more reliable drug concentrations than solutions prepared on the ward? *Intensive Care Med* 2011;37:1311-6.
9. Ding Q, Barker K, Flynn E, et al. Incidence of intravenous medication errors in a chinese hospital. *Val Health Reg Issues* 2015;6C:33-39.

- 1  
2  
3 10. Fahimi F, Sistanizad M, Abrishami R, et al. An observational study of errors related to the  
4 preparation and administration of medications given by infusion devices in a teaching hospital. .  
5  
6 *Iran J Pharm Res* 2007;6:295-99.  
7  
8
- 9  
10 11. Fahimi F, Ariapanah P, Faizi M, et al. Errors in preparation and administration of intravenous  
11 medications in the intensive care unit of a teaching hospital: an observational study. *Aust Crit*  
12 *Care* 2008;21:110-6.  
13  
14
- 15  
16 12. Helder OK, Kornelisse RF, Reiss IK, et al. Disinfection practices in intravenous drug  
17 administration. *Am J Infect Control* 2016;44:721-3.  
18  
19
- 20  
21 13. Hoefel HH, Lautert L. Errors committed by nursing technicians and assistants in administering  
22 antibiotics. *Am J Infect Control* 2006;34:437-42.  
23  
24
- 25  
26 14. Khalili H, Sheikhabayi M, Samadi N, et al. Bacterial contamination of single- and multiple-dose  
27 vials after multiple use and intravenous admixtures in three different hospitals in Iran. *Iran J*  
28 *Pharm Res* 2013;12:205-09.  
29  
30
- 31  
32 15. Macias AE, Munoz JM, Galvan A, et al. Nosocomial bacteremia in neonates related to poor  
33 standards of care. *Pediatr Infect Dis J* 2005;24:713-6.  
34  
35
- 36  
37 16. Mackay MW, Cash J, Farr F, et al. Improving Pediatric Outcomes through Intravenous and Oral  
38 Medication Standardization. *J Pediatr Pharmacol Ther* 2009;14:226-35.  
39  
40
- 41  
42 17. Masini C, Nanni O, Antaridi S, et al. Automated preparation of chemotherapy: quality  
43 improvement and economic sustainability. *Am J Health Syst Pharm* 2014;71:579-85.  
44  
45
- 46  
47 18. Moniz TT, Chu S, Tom C, et al. Sterile product compounding using an i.v. compounding  
48 workflow management system at a pediatric hospital. *Am J Health Syst Pharm* 2014;71:1311-7.  
49  
50
- 51  
52 19. Nguyen HT, Pham HT, Vo DK, et al. The effect of a clinical pharmacist-led training programme  
53 on intravenous medication errors: a controlled before and after study. *BMJ Qual Saf* 2014;23:319-  
54 24.  
55
- 56  
57 20. Niemann D, Bertsche A, Meyrath D, et al. A prospective three-step intervention study to prevent  
58 medication errors in drug handling in paediatric care. *J Clin Nurs* 2015;24:101-14.  
59  
60

- 1  
2  
3 21. Ong WM, Subasyini S. Medication errors in intravenous drug preparation and administration.  
4  
5 *Med J Malaysia* 2013;68:52-7.  
6
- 7  
8 22. Parshuram CS, Dupuis LL, To T, et al. Occurrence and impact of unanticipated variation in  
9  
10 intravenous methotrexate dosing. *Ann Pharmacother* 2006;40:805-11.  
11
- 12  
13 23. Rashed AN, Tomlin S, Aguado V, et al. Sources and magnitude of error in preparing morphine  
14  
15 infusions for nurse-patient controlled analgesia in a UK paediatric hospital. *Int J Clin Pharm*  
16  
17 2016;38:1069-74.  
18
- 19  
20 24. Reece KM, Lozano MA, Roux R, et al. Implementation and evaluation of a gravimetric i.v.  
21  
22 workflow software system in an oncology ambulatory care pharmacy. *Am J Health Syst Pharm*  
23  
24 2016;73:165-73.  
25
- 26  
27 25. Rodriguez-Gonzalez CG, Herranz-Alonso A, Martin-Barbero ML, et al. Prevalence of medication  
28  
29 administration errors in two medical units with automated prescription and dispensing. *J Am Med*  
30  
31 *Inform Assoc* 2012;19:72-8.  
32
- 33  
34 26. Sacks GS, Rough S, Kudsk KA. Frequency and severity of harm of medication errors related to  
35  
36 the parenteral nutrition process in a large university teaching hospital. *Pharmacotherapy*  
37  
38 2009;29:966-74.  
39
- 40  
41 27. Seger AC, Churchill WW, Keohane CA, et al. Impact of robotic antineoplastic preparation on  
42  
43 safety, workflow, and costs. *J Oncol Pract* 2012;8:344-49.  
44
- 45  
46 28. Skouroliakou M, Konstantinou D, Papasarantopoulos P, et al. Computer assisted total parenteral  
47  
48 nutrition for pre-term and sick term neonates. *Pharm World Sci* 2005;27:305-10.  
49
- 50  
51 29. Tavakoli-Ardakani M, Omidi S, Eshraghi A, et al. Medication errors in administration of  
52  
53 chemotherapeutic agents: an observational study. *Iran J Pharm Sci* 2013;9:1-11.  
54
- 55  
56 30. Terkola R, Czejka M, Bérubé J. Evaluation of real-time data obtained from gravimetric  
57  
58 preparation of antineoplastic agents shows medication errors with possible critical therapeutic  
59  
60 impact: Results of a large-scale, multicentre, multinational, retrospective study. *J Clin Pharm*  
*Ther* 2017;doi: 10.1111/jcpt.12529. [Epub ahead of print].



- 1  
2  
3  
4  
5  
6  
7  
8  
9  
10  
11  
12  
13  
14  
15  
16  
17  
18  
19  
20  
21  
22  
23  
24  
25  
26  
27  
28  
29  
30  
31  
32  
33  
34  
35  
36  
37  
38  
39  
40  
41  
42  
43  
44  
45  
46  
47  
48  
49  
50  
51  
52  
53  
54  
55  
56  
57  
58  
59  
60
31. van den Heever A, Scribante J, Perrie H, et al. Microbial contamination and labelling of self-prepared, multi-dose phenylephrine solutions used at a teaching hospital. *Southern African Journal of Anaesthesia and Analgesia* 2016;22:175-79.
32. Westbrook JI, Rob MI, Woods A, et al. Errors in the administration of intravenous medications in hospital and the role of correct procedures and nurse experience. *BMJ Qual Saf* 2011;20:1027-34.
33. Wheeler DW, Degnan BA, Sehmi JS, et al. Variability in the concentrations of intravenous drug infusions prepared in a critical care unit. *Intensive Care Med* 2008;34:1441-7.
34. Yin TS, Said MM, Rahman RA, et al. An investigation of errors: The preparation and administration of parenteral medications in an intensive care unit of a tertiary teaching hospital in Malaysia. *Int J Pharm Pharm Sci* 2016;8:325-29.
35. Otero Lopez MJ, Castano Rodriguez B, Perez Encinas M, et al. [Updated classification for medication errors by the Ruiz-Jarabo 2000 Group]. *Farm Hosp* 2008;32:38-52.



# PRISMA 2009 Checklist

1  
2  
3  
4  
5  
6  
7  
8  
9  
10  
11  
12  
13  
14  
15  
16  
17  
18  
19  
20  
21  
22  
23  
24  
25  
26  
27  
28  
29  
30  
31  
32  
33  
34  
35  
36  
37  
38  
39  
40  
41  
42  
43  
44  
45  
46  
47  
48  
49

| Section/topic                      | #  | Checklist item                                                                                                                                                                                                                                                                                              | Reported on page # |
|------------------------------------|----|-------------------------------------------------------------------------------------------------------------------------------------------------------------------------------------------------------------------------------------------------------------------------------------------------------------|--------------------|
| <b>TITLE</b>                       |    |                                                                                                                                                                                                                                                                                                             |                    |
| Title                              | 1  | Identify the report as a systematic review, meta-analysis, or both.                                                                                                                                                                                                                                         | 1                  |
| <b>ABSTRACT</b>                    |    |                                                                                                                                                                                                                                                                                                             |                    |
| Structured summary                 | 2  | Provide a structured summary including, as applicable: background; objectives; data sources; study eligibility criteria, participants, and interventions; study appraisal and synthesis methods; results; limitations; conclusions and implications of key findings; systematic review registration number. | 2                  |
| <b>INTRODUCTION</b>                |    |                                                                                                                                                                                                                                                                                                             |                    |
| Rationale                          | 3  | Describe the rationale for the review in the context of what is already known.                                                                                                                                                                                                                              | 4-5                |
| Objectives                         | 4  | Provide an explicit statement of questions being addressed with reference to participants, interventions, comparisons, outcomes, and study design (PICOS).                                                                                                                                                  | 5                  |
| <b>METHODS</b>                     |    |                                                                                                                                                                                                                                                                                                             |                    |
| Protocol and registration          | 5  | Indicate if a review protocol exists, if and where it can be accessed (e.g., Web address), and, if available, provide registration information including registration number.                                                                                                                               | 10                 |
| Eligibility criteria               | 6  | Specify study characteristics (e.g., PICOS, length of follow-up) and report characteristics (e.g., years considered, language, publication status) used as criteria for eligibility, giving rationale.                                                                                                      | 7                  |
| Information sources                | 7  | Describe all information sources (e.g., databases with dates of coverage, contact with study authors to identify additional studies) in the search and date last searched.                                                                                                                                  | 7-8                |
| Search                             | 8  | Present full electronic search strategy for at least one database, including any limits used, such that it could be repeated.                                                                                                                                                                               | 41-43              |
| Study selection                    | 9  | State the process for selecting studies (i.e., screening, eligibility, included in systematic review, and, if applicable, included in the meta-analysis).                                                                                                                                                   | 8-9                |
| Data collection process            | 10 | Describe method of data extraction from reports (e.g., piloted forms, independently, in duplicate) and any processes for obtaining and confirming data from investigators.                                                                                                                                  | 9-10               |
| Data items                         | 11 | List and define all variables for which data were sought (e.g., PICOS, funding sources) and any assumptions and simplifications made.                                                                                                                                                                       | 10                 |
| Risk of bias in individual studies | 12 | Describe methods used for assessing risk of bias of individual studies (including specification of whether this was done at the study or outcome level), and how this information is to be used in any data synthesis.                                                                                      | 10                 |
| Summary measures                   | 13 | State the principal summary measures (e.g., risk ratio, difference in means).                                                                                                                                                                                                                               | 10                 |
| Synthesis of results               | 14 | Describe the methods of handling data and combining results of studies, if done, including measures of consistency (e.g., $I^2$ for each meta-analysis).                                                                                                                                                    | n/a                |

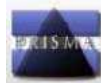

# PRISMA 2009 Checklist

Page 1 of 2

| Section/topic                 | #  | Checklist item                                                                                                                                                                                           | Reported on page # |
|-------------------------------|----|----------------------------------------------------------------------------------------------------------------------------------------------------------------------------------------------------------|--------------------|
| Risk of bias across studies   | 15 | Specify any assessment of risk of bias that may affect the cumulative evidence (e.g., publication bias, selective reporting within studies).                                                             | n/a                |
| Additional analyses           | 16 | Describe methods of additional analyses (e.g., sensitivity or subgroup analyses, meta-regression), if done, indicating which were pre-specified.                                                         | n/a                |
| <b>RESULTS</b>                |    |                                                                                                                                                                                                          |                    |
| Study selection               | 17 | Give numbers of studies screened, assessed for eligibility, and included in the review, with reasons for exclusions at each stage, ideally with a flow diagram.                                          | 11                 |
| Study characteristics         | 18 | For each study, present characteristics for which data were extracted (e.g., study size, PICOS, follow-up period) and provide the citations.                                                             | 13-16              |
| Risk of bias within studies   | 19 | Present data on risk of bias of each study and, if available, any outcome level assessment (see item 12).                                                                                                | n/a                |
| Results of individual studies | 20 | For all outcomes considered (benefits or harms), present, for each study: (a) simple summary data for each intervention group (b) effect estimates and confidence intervals, ideally with a forest plot. | n/a                |
| Synthesis of results          | 21 | Present results of each meta-analysis done, including confidence intervals and measures of consistency.                                                                                                  | n/a                |
| Risk of bias across studies   | 22 | Present results of any assessment of risk of bias across studies (see Item 15).                                                                                                                          | n/a                |
| Additional analysis           | 23 | Give results of additional analyses, if done (e.g., sensitivity or subgroup analyses, meta-regression [see Item 16]).                                                                                    | n/a                |
| <b>DISCUSSION</b>             |    |                                                                                                                                                                                                          |                    |
| Summary of evidence           | 24 | Summarize the main findings including the strength of evidence for each main outcome; consider their relevance to key groups (e.g., healthcare providers, users, and policy makers).                     | 26                 |
| Limitations                   | 25 | Discuss limitations at study and outcome level (e.g., risk of bias), and at review-level (e.g., incomplete retrieval of identified research, reporting bias).                                            | 30                 |
| Conclusions                   | 26 | Provide a general interpretation of the results in the context of other evidence, and implications for future research.                                                                                  | 30                 |
| <b>FUNDING</b>                |    |                                                                                                                                                                                                          |                    |
| Funding                       | 27 | Describe sources of funding for the systematic review and other support (e.g., supply of data); role of funders for the systematic review.                                                               | 31                 |

From: Moher D, Liberati A, Tetzlaff J, Altman DG, The PRISMA Group (2009). Preferred Reporting Items for Systematic Reviews and Meta-Analyses: The PRISMA Statement. PLoS Med 6(6): e1000097. doi:10.1371/journal.pmed1000097

For more information, visit: [www.prisma-statement.org](http://www.prisma-statement.org).

Page 2 of 2

For peer review only - <http://bmjopen.bmj.com/site/about/guidelines.xhtml>

# BMJ Open

## Systematic evidence review of rates and burden of harm of intravenous admixture drug preparation errors in healthcare settings

|                                 |                                                                                                                                                                                                                                                                                                                                                                                                                                       |
|---------------------------------|---------------------------------------------------------------------------------------------------------------------------------------------------------------------------------------------------------------------------------------------------------------------------------------------------------------------------------------------------------------------------------------------------------------------------------------|
| Journal:                        | <i>BMJ Open</i>                                                                                                                                                                                                                                                                                                                                                                                                                       |
| Manuscript ID                   | bmjopen-2017-015912.R2                                                                                                                                                                                                                                                                                                                                                                                                                |
| Article Type:                   | Research                                                                                                                                                                                                                                                                                                                                                                                                                              |
| Date Submitted by the Author:   | 24-Jul-2017                                                                                                                                                                                                                                                                                                                                                                                                                           |
| Complete List of Authors:       | Hedlund, Nancy; Baxter International Inc, Global HEOR<br>Beer, Idal; Baxter Healthcare Corporation, Global Medical Affairs<br>Hoppe-Tichy, Torsten; University Hospital of Heidelberg , Pharmacy<br>Department and Cooperation Unit Clinical Pharmacy; Ruprecht-Karls-<br>University of Heidelberg,<br>Trbovich, Patricia; University of Toronto, Institute of Health Policy,<br>Medicine and Evaluation; North York General Hospital |
| <b>Primary Subject Heading</b>: | Evidence based practice                                                                                                                                                                                                                                                                                                                                                                                                               |
| Secondary Subject Heading:      | Nursing                                                                                                                                                                                                                                                                                                                                                                                                                               |
| Keywords:                       | Medication Errors, Drug Compounding, Intravenous Admixture Preparation Error, Systematic Review                                                                                                                                                                                                                                                                                                                                       |
|                                 |                                                                                                                                                                                                                                                                                                                                                                                                                                       |

SCHOLARONE™  
Manuscripts

1  
2  
3 **1 Systematic evidence review of rates and burden of harm of intravenous admixture drug**  
4  
5  
6 **2 preparation errors in healthcare settings**  
7

8  
9 3 Nancy Hedlund,<sup>1\*</sup> Idal Beer,<sup>2</sup> Torsten Hoppe-Tichy,<sup>3</sup> Patricia Trbovich<sup>4,5</sup>

10  
11  
12 4 *<sup>1</sup>Baxter Healthcare Corporation, Global Health Economics and Outcomes Research, Deerfield,*  
13  
14 5 *Illinois, United States*

15  
16  
17 6 *<sup>2</sup>Baxter Healthcare Corporation, Medical Affairs, Deerfield Illinois, United States*

18  
19  
20 7 *<sup>3</sup>University Hospital of Heidelberg, Pharmacy Department and Cooperation Unit Clinical*  
21  
22 8 *Pharmacy, Ruprecht-Karls-University of Heidelberg, Heidelberg, Germany*

23  
24  
25 9 *<sup>4</sup>Institute of Health Policy, Management and Evaluation, University of Toronto, Toronto,*  
26  
27 10 *Ontario, Canada*

28  
29  
30 11 *<sup>5</sup>North York General Hospital, Toronto, Ontario, Canada*

31  
32  
33  
34  
35 13 *\*Formerly of Baxter Healthcare Corporation, Deerfield Illinois, United States (During conduct*  
36  
37 14 *of the research)*

38  
39  
40  
41 **15 Corresponding author:**

42  
43 16 Idal Beer, MD, MBA, MPH

44  
45 17 Baxter Healthcare Corporation

46  
47 18 One Baxter Parkway

48  
49 19 Deerfield, IL, USA 60015

50  
51  
52 20 Telephone no.: 224-948-3336

53  
54  
55 21 E-mail address: idal\_beer@baxter.com

56  
57  
58 22

1  
2  
3 **1 ABSTRACT (300/300)**  
4

5  
6 **2 Objective:** To examine published evidence on intravenous (IV) admixture preparation errors  
7  
8  
9 **3** (IAPEs) in healthcare settings.

10  
11 **4 Methods:** Searches were conducted in 3 electronic databases (January 2005 to April 2017).  
12  
13  
14  
15  
16  
17  
18  
19  
20  
21  
22  
23  
24  
25  
26  
27  
28  
29  
30  
31  
32  
33  
34  
35  
36  
37  
38  
39  
40  
41  
42  
43  
44  
45  
46  
47  
48  
49  
50  
51  
52  
53  
54  
55  
56  
57  
58  
59  
60  
**5** Publications reporting rates of IAPEs and error types were reviewed and categorized into the  
**6** following groups: component errors, dose/calculation errors, aseptic technique errors, and  
**7** composite errors. The methodological rigor of each study was assessed using the Hawker  
**8** method.

**9 Results:** Of the 34 articles that met inclusion criteria, 28 reported the site of IAPEs: central  
**10** pharmacies (n = 8), nursing wards (n = 14), both settings (n = 4), and other sites (n = 3). Using  
**11** the Hawker criteria, 14% of the articles were of good quality, 74% were of fair quality, and 12%  
**12** were of poor quality. Error types and reported rates varied substantially, including wrong drug  
**13** (~0% to 4.7%), wrong diluent solution (0% to 49.0%), wrong label (0% to 99.0%), wrong dose  
**14** (0% to 32.6%), wrong concentration (0.3% to 88.6%), wrong diluent volume (0.06% to 49.0%),  
**15** and inadequate aseptic technique (0% to 92.7%). Four studies directly compared incidence by  
**16** preparation site and/or method, finding error incidence to be lower for doses prepared within a  
**17** central pharmacy versus the nursing ward, and lower for automated preparation versus manual  
**18** preparation. Although 8 studies (24%) reported  $\geq 1$  errors with the potential to cause patient  
**19** harm, no study directly linked IAPE occurrences to specific adverse patient outcomes.

**20 Conclusions:** The available data suggest a need to continue to optimize the IV preparation  
**21** process, focus on improving preparation workflow, design and implement preventive strategies,  
**22** train staff on optimal admixture protocols, and implement standardization. Future research  
**23** should focus on the development of consistent error subtype definitions, standardized reporting

1  
2  
3 1 methodology, and reliable, reproducible methods to track and link risk factors with the burden of  
4  
5  
6 2 harm associated with these errors.

7  
8 3

9  
10  
11 4 **Strengths and limitations of this study**

- 12  
13  
14  
15 5 • To the authors' knowledge, this is the first systematic review conducted that attempts to  
16  
17 6 categorize intravenous admixture preparation errors (IAPEs) according to both the  
18  
19 7 characteristics of the error and the location and method of intravenous (IV) preparation.  
20  
21  
22 8 • Although IAPE is a safety concern, its frequency, subtypes, and associated burden of  
23  
24 9 harm are not well understood; thus, the current review presented a thoughtful and valid  
25  
26 10 framework to assess IAPEs within their procedural context.  
27  
28  
29 11 • This review attempted to include all articles published in English between January 2005  
30  
31 12 and April 2017 that reported on IAPEs in which healthcare professionals prepared  $\geq 1$   
32  
33 13 dose of IV administered therapy.  
34  
35  
36 14 • This review is limited by the number of studies identified that reported data on the  
37  
38 15 frequency and/or burden of harm of IAPEs.  
39  
40  
41 16  
42  
43  
44 17

## 1 INTRODUCTION

2 Errors in medication preparation and administration can lead to patient harm.[1-3] For example,  
3 many preventable adverse events with respect to medication have been linked to errors in dosing  
4 (eg, patients receiving higher or lower amounts of medication than intended).[2, 4] The  
5 medication use cycle for an intravenous (IV) medication involves multiple steps prior to  
6 administration, including prescribing and transcription (paper-based orders), in addition to a  
7 number of admixture preparation and labeling steps (**Figure 1**).

### 8 **Figure 1. Intravenous medication use cycle**

9 An IV admixture preparation error (IAPE) can be considered as any deviation from the  
10 specifications involved in the admixture preparation and labeling process. An IAPE is a form of  
11 medication error—in other words, a preventable adverse event resulting from inappropriate  
12 medication preparation, administration, or use that can lead to patient harm, including death,  
13 while the medication is in the control of the healthcare professional, patient, or consumer.[5, 6]

14 IAPEs can be introduced at multiple points during admixture preparation and labeling.  
15 These steps can occur on site at a nursing ward or in a central or satellite pharmacy. IV  
16 medication doses are typically prepared (1) manually by nurses, either at the bedside or in a  
17 ward-based preparation room, (2) manually by pharmacists and pharmacy technicians in a  
18 central or satellite clean room under a laminar-airflow hood, or (3) through the use of pharmacy  
19 automation technology, which can be partially or fully automated and may be located in clean  
20 rooms or clean compartments within the machine. United States data suggest increasing use of  
21 automated technologies aimed at reducing IAPEs, for technologies ranging from robotic  
22 chemotherapy compounding devices (0.3% of hospitals) to barcode verification (20% of



1 hospitals), with higher levels of adoption predominantly within larger hospitals.[7] Delivery of  
2 the correct dose of an IV admixture to a patient depends on the careful control of many factors,  
3 such as the calculation of a patient-specific dose (eg, based on body weight or organ function),  
4 oversight of procedures utilized for admixture preparation, and labeling practices.[4, 8] While  
5 research suggests that the highest medication-error rates can be attributed to the prescribing and  
6 administration phases of the medication use cycle,[9-11] studies focused on medication  
7 preparation practices suggest that the IV admixture preparation and labeling phase pose a  
8 significant potential for errors.[9, 12-15] It is unknown what proportion of IAPEs are unreported.

9 In addition to measuring the incidence of IAPEs, it is also important to understand their  
10 impact in terms of burden of harm. Two examples of existing frameworks for categorizing  
11 patient harm resulting from medication errors are The Institute for Safe Medication Practices  
12 (ISMP) high-alert medication lists and The National Coordinating Council for Medication Error  
13 Reporting and Prevention (NCC MERP) Medication Error Index. ISMP publishes information  
14 and educational resources for healthcare providers on preventing medication errors, and tracks  
15 voluntary medication errors reports. Based on these voluntary error reports, ISMP maintains lists  
16 of high-alert medications in outpatient and inpatient settings that have the potential for increased  
17 risk of patient harm if used in error.[16] The NCC MERP Medication Error Index groups  
18 medication errors into nine possible categories, ranging from non-errors (situations in which  
19 errors may occur) to errors resulting in patient death.[17] These categories also include near-miss  
20 (near-hit) situations in which an error occurred but did not reach the patient or cause harm. ISMP  
21 uses the NCC MERP Medication Error Index in its medication error database.

22 Much of the prior published research focusing on the prescription or administration of IV  
23 therapies has failed to describe or distinguish between errors that arise as a result of the

1 admixture preparation process versus errors associated with incorrect prescribing or  
 2 administration.[18-21] With this systematic review, our objective is to identify the incidence of  
 3 IAPes (overall and by subtype) reported across institutional healthcare settings and to understand  
 4 the frequency of error subtypes and associated burden of patient harm attributable to IAPes as  
 5 reported in the published literature.

6

## 7 **METHODS**

### 8 **Identification of literature and data sources**

9 For the purposes of this review, an IAPE was defined as an error or deviation at any step within  
 10 the admixture preparation process where the drug container was physically handled or  
 11 manipulated by a healthcare professional. A broad search strategy was developed to identify all  
 12 studies (published from January 2005 to September 2015) that mention any type of IAPE in an  
 13 institutional healthcare setting, which included reports relating to wrong drug, wrong diluent  
 14 solution, wrong label, wrong dose, wrong concentration, wrong diluent volume, and inadequate  
 15 aseptic technique. Dose omission errors were considered to be errors related to administration  
 16 rather than preparation and, thus, were not included as a focus in this study. Near-miss and actual  
 17 errors (those that did reach patients) were both included. The review was structured based on the  
 18 PICOS (patients, intervention, comparator, outcomes, and study design) search strategy (**Table**  
 19 **1**).

---

51 **Table 1. PICOS Search Strategy**

---

|                        |                                                                                                                                                                                                                |
|------------------------|----------------------------------------------------------------------------------------------------------------------------------------------------------------------------------------------------------------|
| <b>Patient/Problem</b> | Incorrect preparation of IV admixtures within an institutional healthcare setting (acute or long-term care) by a licensed healthcare professional (nursing and/or pharmacy staff and/or physician) team member |
|------------------------|----------------------------------------------------------------------------------------------------------------------------------------------------------------------------------------------------------------|

---

|                     |                                                                                                                                                                                                                                                                                                                                                                                                                                                                                                               |
|---------------------|---------------------------------------------------------------------------------------------------------------------------------------------------------------------------------------------------------------------------------------------------------------------------------------------------------------------------------------------------------------------------------------------------------------------------------------------------------------------------------------------------------------|
| <b>Intervention</b> | Preparation of an IV admixture                                                                                                                                                                                                                                                                                                                                                                                                                                                                                |
| <b>Comparison</b>   | Automated versus manual preparation methods (studies were not required to demonstrate both)<br>Central pharmacy versus on-unit (on the nursing ward) preparation location (studies were not required to demonstrate both)                                                                                                                                                                                                                                                                                     |
| <b>Outcome</b>      | Incorrectly prepared or labeled IV admixture, which may or may not have reached a patient: <ul style="list-style-type: none"> <li>• Wrong drug or diluent</li> <li>• Wrong dose, concentration, or volume</li> <li>• Wrong, inaccurate, or omitted label</li> <li>• Contaminated admixture or failure to follow hygiene or sterility protocols</li> <li>• A combination of the above</li> </ul>                                                                                                               |
| <b>Study Types</b>  | <b>Inclusion criteria:</b> Observational studies for which numerator (number of doses impacted or number of errors) and denominator (number of eligible doses or opportunities for error) are discernible<br><b>Exclusion criteria:</b> Studies in which isolated contamination volumes are reported but for which total batch size is unknown fail to qualify for consideration<br>Error report logs for which number of errors is known but associated number of prepared doses is not also fail to qualify |

1 IV, intravenous; PICOS, patients, intervention, comparator, outcomes, and study design..

## 2 **Systematic review process**

3 Three electronic databases were searched for relevant literature reporting on IAPE: Ovid  
4 MEDLINE, EMBASE, and International Pharmaceutical Abstracts. The initial search was  
5 conducted on February 6, 2014, with supplementation on September 4, 2015 to include articles  
6 published during the interim. Aggregate results include articles published in English between  
7 January 2005 and April 2017 that involved studies in human subjects in which a healthcare  
8 professional prepared  $\geq 1$  doses of IV administered therapy (medication, including total  
9 parenteral nutrition). This date range was selected to include a sufficiently long period to capture  
10 the studies of interest, while remaining relevant to current practice in terms of technology and  
11 guidelines. Key search terms and limits used in the systematic review are shown in **online**  
12 **supplementary Table S1**. Screenings for relevant literature citations that appeared in the  
13 publications were made during the review process to identify any pertinent, additional  
14 publications up to April 2017. For this systematic review, references had to meet the

1 inclusion/exclusion criteria detailed in the next section. Duplicate articles were removed  
2 electronically prior to manual review. Titles of the papers and abstracts captured in the electronic  
3 search results were screened by 2 reviewers for relevancy according to prespecified criteria. If  
4 the titles did not provide sufficient information for screening, the abstract or full-text articles  
5 were then reviewed to discern whether the publication met inclusion criteria. All publications  
6 that met entry criteria for the review were obtained as full-text articles and then reassessed by the  
7 reviewers against the review criteria. The review process was fully compliant with the 2009  
8 Preferred Reporting Items for Systematic Reviews and Meta-Analyses (PRISMA)  
9 guidelines.[22]

## 10 **Inclusion and exclusion criteria**

11 Publications reporting on a randomized, controlled trial, prospective cohort study, observational  
12 quality audit, descriptive study, quasi-experimental study, or quality-improvement study were  
13 selected for inclusion. Quasi-experimental studies, quality-improvement studies, and descriptive  
14 studies were eligible if they included sufficient data on the number of doses prepared. While  
15 systematic reviews reporting on these study types were not included, their respective reference  
16 lists were reviewed to identify potentially relevant studies. Publications were not limited to a  
17 single geographic or physical study location and may have occurred in the hospital or any other  
18 institutional or outpatient healthcare setting associated with a hospital.

19 Publications and studies were included for review if they either reported incidence of  
20 IAPE or provided sufficient detail for incidence calculation. These errors included incorrectly  
21 dispensed medication as well as near-misses that were caught by the study observer prior to  
22 administration. Errors also had to originate with a healthcare professional (eg, nurse or  
23 pharmacist). Studies reporting patient or informal caregiver medication errors were not included.

1  
2  
3 1 To be included, studies were required to report original data on IAPes, including a denominator,  
4  
5  
6 2 to allow for incidence calculations.  
7

8  
9 3 Articles that described only errors in prescribing, transcription, administration, and  
10  
11 4 monitoring were not included. In addition to all articles that failed to meet the aforementioned  
12  
13 5 inclusion criteria, the following article types were also excluded: conference abstracts, case  
14  
15 6 reports, simulations, and survey findings.  
16  
17

### 18 19 7 **Data extraction**

20  
21  
22 8 The data extracted from relevant articles for analysis included year of publication, country of  
23  
24 9 origin, study period, patient population, definition of error, IV preparation location (eg, central or  
25  
26 10 satellite pharmacy or nursing ward), care setting (eg, critical care, general nursing ward), type of  
27  
28 11 therapy, method of error detection, and error incidence. Data were extracted and scored  
29  
30 12 independently by 2 separate reviewers, with introduction of a third reviewer in the case of  
31  
32 13 scoring discrepancies, with all differences being resolved by consensus. Each review team  
33  
34 14 included  $\geq 1$  pharmacist for professional knowledge and understanding of drug preparation. The  
35  
36 15 methodological rigor of each study was critically appraised and scored using the Hawker  
37  
38 16 method.[23] This appraisal tool is simple and particularly adaptable to literature reviews  
39  
40 17 encompassing varied research methodologies.[24] It employs 9 criteria to evaluate for each  
41  
42 18 study: 1) abstract and title; 2) introduction and aims; 3) method and data; 4) sampling; 5) data  
43  
44 19 analysis; 6) ethics and bias; 7) results; 8) transferability or generalizability; and 9) implications  
45  
46 20 and usefulness. For each criterion, studies were scored as: good (score 4), fair (score 3), poor  
47  
48 21 (score 2), or very poor (score 1). A mean score was then calculated for each study across all 9  
49  
50 22 criteria, and the overall quality of each study was likewise scored from good to very poor.  
51  
52  
53  
54  
55  
56  
57  
58  
59  
60

1 For the purposes of this review, IAPEs were grouped into 1 of 4 categories based on the  
2 characteristics of the error and the location and method of IV preparation. Component errors  
3 were defined as all those that result from selecting an incorrect ingredient (ie, wrong drug or  
4 wrong diluent solution), or applying an incorrect, incomplete, or inaccurate label (ie, wrong  
5 label) to the admixture. Dose/calculation errors were defined as those involving the use of an  
6 incorrect calculation to determine dose and/or diluent amount, or the use of a diluent volume not  
7 in accordance with the package insert (ie, wrong dose, wrong concentration, and wrong diluent  
8 volume). Aseptic technique errors involved a breakdown in the process designed to minimize the  
9 potential for antimicrobial contamination (ie, inadequate aseptic technique, bacterial  
10 contamination, failure to disinfect vial, and improper hand hygiene). The category of composite  
11 errors was used to describe IAPE rates reported in aggregate, in which the researchers reported  
12 an overall rate that included multiple IAPE subtypes. Composite errors included cases in which  
13 >1 error or type of error was observed in a single preparation.

14 This study was registered with the PROSPERO international database of systematic  
15 reviews (CRD42014010418) to comply with PRISMA guidelines.

## 16 RESULTS

17 Electronic database searches yielded 2018 English language publications for review. Additional  
18 sources (hand searches of publication reference lists) identified another 3 publications for  
19 evaluation. After removing duplicates and screening for inclusion and exclusion criteria, 34  
20 articles were included in the final synthesis (**Figure 2**).[3, 25-57] Of the 34 articles, 5 (15%)  
21 were rated good quality,[30, 34, 38, 45, 46] 25 (74%) were fair quality,[3, 25-29, 31-33, 36, 37,  
22 39-41, 43, 44, 48, 51-57] and 4 (12%) were poor quality[35, 42, 49, 50] after assessment using  
23 the Hawker method. The quality of 1 study (3%) could not be fully scored due to a missing data

1  
2  
3 1 table in the available publication.[47] Details of the Hawker analysis for each study are shown in  
4  
5  
6 2 online **supplementary Table S2**.

7  
8  
9 3 **Figure 2. PRISMA study inclusion flow diagram**

10  
11  
12 4 **Study characteristics**

13  
14  
15 5 A summary of the study characteristics, in terms of the setting and methodology,  
16  
17 6 described in the 34 publications is presented in **Table 2**. Collectively, the publications reported  
18  
19 7 international data, with studies spanning Africa, North America, South America, Europe, the  
20  
21 8 Eastern Mediterranean region, and the Western Pacific region. Patient populations varied across  
22  
23 9 studies, with both adults and children represented. Studies were conducted mainly in general  
24  
25 10 inpatient or critical care settings, with several in pediatric or hematology units. The majority of  
26  
27 11 publications (21 [62%]) assessed errors in >1 type of IV therapy. Additional individual details  
28  
29 12 for each study are shown in online **supplementary Table S3**.

30  
31  
32  
33  
34 13

35  
36  
37 14

38  
39  
40 15

**Table 2. Summary of study characteristics**

| Study Setting Characteristics           | n (%)   | Study Methodology Characteristics                      | n (%)   | IV Admixture Preparation Characteristics    | n (%)   |
|-----------------------------------------|---------|--------------------------------------------------------|---------|---------------------------------------------|---------|
| <b>Geographical region</b>              |         | <b>Study design</b>                                    |         | <b>Location of IV admixture preparation</b> |         |
| Europe                                  | 13 (38) | Single arm                                             | 21 (62) | Nursing ward                                | 13 (38) |
| Americas                                | 10 (29) | Interventional                                         | 8 (24)  | Central pharmacy                            | 8 (24)  |
| Western Pacific                         | 6 (18)  | Comparative                                            | 5 (15)  | Not specified                               | 6 (18)  |
| Eastern Mediterranean                   | 4 (12)  |                                                        |         | Nursing ward and central pharmacy           | 4 (12)  |
| Africa                                  | 1 (3)   | <b>Observational technique</b>                         |         | Nursing ward and operating theater          | 1 (3)   |
|                                         |         | Direct observation                                     | 17 (50) | Offsite pharmacy                            | 1 (3)   |
| <b>Number of sites</b>                  |         | Analysis of final concentration                        | 5 (15)  | Obstetric theater                           | 1 (3)   |
| Single-center                           | 28 (82) | Bacterial culture                                      | 4 (12)  |                                             |         |
| 2 centers                               | 3 (9)   | Cross-checking                                         | 3 (9)   | <b>Method of IV admixture preparation</b>   |         |
| 3 or more centers                       | 3 (9)   | Incident report                                        | 3 (9)   | Manual                                      | 22 (68) |
|                                         |         | Chart review                                           | 1 (3)   | Automated                                   | 4 (12)  |
| <b>Patient population</b>               |         | Direct observation and analysis of final concentration | 1 (3)   | Manual vs automated                         | 4 (12)  |
| Not specified                           | 15 (44) |                                                        |         | Not specified                               | 3 (9)   |
| Pediatric patients                      | 10 (29) | <b>Measurement of patient impact</b>                   |         |                                             |         |
| Adult patients                          | 6 (18)  | Not measured                                           | 22 (65) | <b>Types of IV therapies</b>                |         |
| Adult and pediatric patients            | 3 (9)   | Clinician assessment or expert panel                   | 6 (18)  | Multiple                                    | 21 (62) |
|                                         |         | NCC MERP medication error index                        | 3 (9)   | Chemotherapy                                | 7 (21)  |
| <b>Care setting</b>                     |         | Other                                                  | 2 (6)   | Parenteral nutrition or IV lipid emulsion   | 3 (9)   |
| Critical care*                          | 9 (26)  | ISMP high-alert medication                             | 1 (3)   | Antibiotic                                  | 1 (3)   |
| General inpatient wards                 | 8 (24)  |                                                        |         | Morphine                                    | 1 (3)   |
| Pediatric units                         | 7 (20)  |                                                        |         | Phenylephrine                               | 1 (3)   |
| Oncology and/or hematology <sup>†</sup> | 6 (18)  |                                                        |         |                                             |         |
| General inpatient and critical care     | 3 (9)   |                                                        |         |                                             |         |
| Obstetrics                              | 1 (3)   |                                                        |         |                                             |         |

\*Includes intensive care, neonatal intensive care, post-surgical, and neurologic critical care

<sup>†</sup>Inpatient and/or outpatient

ISMP, Institute for Safe Medication Practices; IV, intravenous; NCC MERP, National Coordination Council for Medication Error Reporting.;



1  
2  
3 1 The most common method of detecting errors was direct observation, used in 17 studies  
4  
5 2 (50%),[3, 25, 26, 28, 31-33, 37, 41, 44-48, 52, 55] and 1 study used direct observation and  
6  
7 3 analysis of final IV admixture concentration.[53] Other methods included analysis of final  
8  
9 4 concentration in 5 studies (15%),[27, 30, 36, 38, 51] bacterial culture in 4 studies (12%),[29, 34,  
10  
11 5 49, 57] cross-checking in three studies (9%),[35, 42, 43] incident reports in 3 studies (9%),[40,  
12  
13 6 54, 56] and chart review in one study.[50] In several studies using the direct observation method,  
14  
15 7 nurses or pharmacists preparing the IV admixtures consented to participate but were not fully  
16  
17 8 aware of the study aims to avoid influencing their behavior.[18, 39, 45] Eight studies (24%)  
18  
19 9 reported on the accuracy of IV preparation before and after an intervention,[35, 36, 41-43, 45,  
20  
21 10 46, 52] 5 studies (15%) compared IV admixture preparation locations or methods,[30, 36, 41, 42,  
22  
23 11 49] and the remaining 21 publications (62%) were single-arm studies.[3, 25-29, 31-34, 37-40,  
24  
25 12 44, 47, 48, 50, 55-57]

26  
27  
28  
29  
30  
31  
32 13 A total of 28 studies reported the IV preparation site. Of those studies, 14  
33  
34 14 publications (38%) reported preparation on the nursing ward[3, 25, 26, 28, 31-34, 37, 43, 47, 48,  
35  
36 15 52, 55] and 8 (24%) reported use of central pharmacies.[26, 27, 29, 35, 36, 40, 41, 44, 54] Three  
37  
38 16 studies (12%) compared rates of IAPes in the nursing ward and a central pharmacy[30, 49, 51]  
39  
40 17 and 1 compared IAPes in the nursing ward and operating theater.[53] Lastly, 2 studies reported  
41  
42 18 IV preparation at offsite pharmacies[56] and in the obstetric theater,[57] respectively.

43  
44  
45  
46  
47 19 While IAPes were not consistently linked with individual patient outcomes in the studies  
48  
49 20 surveyed, nearly half of the studies attempted to assess the potential for patient impact in some  
50  
51 21 way. Twelve (35%) of the publications included in this review reported on the severity of harm  
52  
53 22 or potential for harm arising from identified IAPes (see **online supplementary Table S2**), [3,  
54  
55 23 26, 29, 31, 32, 39-41, 44-46, 48] 8 (67%) of which reported  $\geq 1$  errors to result in various degrees  
56  
57  
58  
59  
60

1 of harm,[3, 26, 40, 41, 44-46, 48] and 4 (33%) having reported no errors to have resulted in  
2 adverse outcomes or to have presented a major patient risk.[29, 31, 32, 39]

3 Of the 12 studies that reported on burden of harm, 3 (25%) used the NCC MERP  
4 medication error index[17] to score identified errors;[31, 39, 40] while 6 studies (50%) relied on  
5 clinician assessment or an expert panel for determination of error severity.[3, 26, 41, 44-46]  
6 Among the 6 studies that used clinician assessment or an expert panel, 2 of the study teams  
7 (Niemann et al[46] and Nguyen et al[45]) assessed errors based on clinical relevance rather than  
8 assigning a score based on patient harm or potential for harm. The remaining 3 studies each took  
9 a different approach to estimating patient harm.[29, 32, 48] Ding and colleagues[48] were the  
10 only authors to record whether the error was associated with a drug found on the ISMP list of  
11 high-alert medications. Crill and colleagues[29] did not have a system for rating error severity  
12 but did note that no contamination errors resulted in patient infections. Lastly, the 2008 study by  
13 Fahimi and colleagues[32] did not describe a specific system for rating error severity, but noted  
14 that none of the errors identified resulted in adverse events or major risks to patients. Further  
15 detail on how each study assessed patient burden of harm is shown in **online supplementary**  
16 **Table S4.**

### 17 **Categorization and incidence of IAPEs**

18 Errors identified in the selected studies were grouped into 4 broad categories: component errors,  
19 dose/calculation errors, aseptic technique errors, and composite errors, as detailed in the Methods  
20 section. Errors of the same subtype were frequently defined slightly differently among studies;  
21 full descriptions of the error subtype definitions are shown in **online supplementary Table S5.**  
22 Incidence values for error subtypes are presented in **Table 3.**

**Table 3. Summary of Reported IAPE Incidence by Error Subtype**

| Reference                | Error incidence calculation                     | Component Errors |                        |              | Dose / Calculation Errors |                     |                      | Aseptic Technique Errors             |                         |                           | Composite Errors      |                                 |
|--------------------------|-------------------------------------------------|------------------|------------------------|--------------|---------------------------|---------------------|----------------------|--------------------------------------|-------------------------|---------------------------|-----------------------|---------------------------------|
|                          |                                                 | Wrong Drug       | Wrong Diluent Solution | Wrong Label  | Wrong Dose                | Wrong Concentration | Wrong Diluent Volume | General Inadequate Aseptic Technique | Bacterial Contamination | Failure to Disinfect Vial | Improper Hand Hygiene | Any Admixture or Labeling Error |
| Anselmi et al. 2007[25]  | Numerator: errors (including near-misses)       | Site 1: 0/804    |                        |              | Site 1: 8/804             |                     |                      |                                      |                         |                           |                       | Across all sites: 118/1391      |
|                          | Denominator: Doses prepared                     | Site 2: 0/100    |                        |              | Site 2: 2/100             |                     |                      |                                      |                         |                           |                       |                                 |
|                          | <b>Incidence:</b>                               | Site 3: 1/487    |                        |              | Site 3: 36/487            |                     |                      |                                      |                         |                           |                       | <b>8.48%</b>                    |
| Aruna et al. 2015[50]    | Numerator: errors                               |                  |                        |              |                           |                     |                      |                                      |                         |                           |                       | 19/225                          |
|                          | Denominator: cases                              |                  |                        |              |                           |                     |                      |                                      |                         |                           |                       |                                 |
|                          | <b>Incidence:</b>                               |                  |                        |              |                           |                     |                      |                                      |                         |                           |                       | <b>8.40%</b>                    |
| Bertsche et al. 2008[26] | Numerator: events                               |                  |                        |              |                           |                     |                      |                                      |                         |                           |                       |                                 |
|                          | Denominator: drug-handling processes            |                  |                        |              |                           |                     |                      |                                      | 218/315                 |                           |                       |                                 |
|                          | <b>Incidence:</b>                               |                  |                        |              |                           |                     |                      |                                      |                         |                           |                       | <b>69.20%</b>                   |
| Campino et al. 2016[51]  | Numerator: Errors                               |                  |                        |              | NICUs: 6/444              |                     |                      |                                      |                         |                           |                       |                                 |
|                          | Denominator: Doses prepared                     |                  |                        |              | Central pharmacy: 0/60    |                     |                      |                                      |                         |                           |                       |                                 |
|                          | <b>Incidence:</b>                               |                  |                        |              |                           |                     |                      |                                      |                         |                           |                       | <b>0.00%–1.35%</b>              |
| Castagne et al. 2011[27] | Numerator: errors (102 near-misses; 544 errors) |                  |                        |              |                           |                     |                      |                                      |                         |                           |                       |                                 |
|                          | Denominator: doses prepared                     |                  |                        |              | 646/7382                  |                     |                      |                                      |                         |                           |                       |                                 |
|                          | <b>Incidence:</b>                               |                  |                        |              |                           |                     |                      |                                      |                         |                           |                       | <b>8.80%</b>                    |
| Cousins et al. 2005[28]  | Numerator: errors (not including near-misses)   | UK: 0/273        | UK: 2/273              | UK: 118/273  | UK: 1/273                 |                     |                      |                                      |                         |                           |                       |                                 |
|                          |                                                 | GER: 0/425       | GER: 208/425           | GER: 421/425 | GER: 7/425                |                     |                      |                                      |                         |                           |                       |                                 |
|                          |                                                 | FR: 0/100        | FR:                    | FR: 421/425  | FR: 5/100                 |                     |                      |                                      |                         |                           |                       |                                 |
|                          |                                                 |                  |                        |              |                           | 13 /798 total       |                      |                                      |                         |                           |                       |                                 |
|                          |                                                 |                  |                        |              |                           |                     |                      |                                      |                         | UK: 295/299               | UK: 299/299           |                                 |
|                          |                                                 |                  |                        |              |                           |                     |                      |                                      |                         | GER: 245/425              | GER: 403/425          |                                 |

| Reference                      | Error incidence calculation                                                                       | Component Errors   |                        |                      | Dose / Calculation Errors |                     |                                                   | Aseptic Technique Errors             |                         |                           | Composite Errors      |                                 |
|--------------------------------|---------------------------------------------------------------------------------------------------|--------------------|------------------------|----------------------|---------------------------|---------------------|---------------------------------------------------|--------------------------------------|-------------------------|---------------------------|-----------------------|---------------------------------|
|                                |                                                                                                   | Wrong Drug         | Wrong Diluent Solution | Wrong Label          | Wrong Dose                | Wrong Concentration | Wrong Diluent Volume                              | General Inadequate Aseptic Technique | Bacterial Contamination | Failure to Disinfect Vial | Improper Hand Hygiene | Any Admixture or Labeling Error |
|                                | Denominator: doses prepared                                                                       |                    | 18/100                 | FR: 20/100           |                           |                     |                                                   |                                      |                         | FR: 4/100                 | FR: 9/100             |                                 |
|                                | <b>Incidence:</b>                                                                                 | <b>0.00%–0.00%</b> | <b>1.00%–49.00%</b>    | <b>20.00%–99.00%</b> | <b>1.00%–5.00%</b>        |                     | <b>2.00%</b>                                      |                                      |                         | <b>4.00%–99.00%</b>       | <b>9.00%–100%</b>     |                                 |
| <b>Crill et al. 2010[29]*</b>  | Numerator: positive bacterial cultures<br>Denominator: syringes prepared<br><b>Incidence:</b>     |                    |                        |                      |                           |                     |                                                   | 3/90                                 | 3/90                    |                           |                       |                                 |
|                                |                                                                                                   |                    |                        |                      |                           |                     |                                                   | <b>3.30%</b>                         | <b>3.30%</b>            |                           |                       |                                 |
| <b>Dehmel et al. 2011[30]†</b> | Numerator: errors<br>Denominator: doses prepared<br><b>Incidence:</b>                             |                    |                        |                      |                           |                     | ±5% deviation: 16/100<br>±10%<br>Deviation: 5/100 |                                      |                         |                           |                       |                                 |
|                                |                                                                                                   |                    |                        |                      |                           |                     | <b>5.00%–16.00%</b>                               |                                      |                         |                           |                       |                                 |
| <b>Dehmel et al. 2011[30]‡</b> | Numerator: errors<br>Denominator: doses prepared<br><b>Incidence:</b>                             |                    |                        |                      |                           |                     | ±5% deviation: 53/100<br>±10% deviation: 22/100   |                                      |                         |                           |                       |                                 |
|                                |                                                                                                   |                    |                        |                      |                           |                     | <b>22.00%–53.00%</b>                              |                                      |                         |                           |                       |                                 |
| <b>Ding et al. 2015[48]§</b>   | Numerator: errors<br>Denominator: TOE (ordered and unordered doses)<br><b>Incidence:</b>          |                    |                        |                      | 50/593                    |                     |                                                   |                                      |                         |                           |                       | 54/593                          |
|                                |                                                                                                   |                    |                        |                      |                           |                     |                                                   |                                      |                         |                           |                       | <b>9.10%</b>                    |
| <b>Fahimi et al. 2007[31]</b>  | Numerator: errors (including near-misses)<br>Denominator: doses administered<br><b>Incidence:</b> | 2/43               |                        | 4/43                 | 14/43                     |                     |                                                   |                                      |                         |                           |                       |                                 |
|                                |                                                                                                   | <b>4.65%</b>       |                        | <b>9.30%</b>         | <b>32.60%</b>             |                     |                                                   |                                      |                         |                           |                       |                                 |
| <b>Fahimi et al. 2008[32]¶</b> | Numerator: errors (including near-misses)<br>Denominator: doses prepared                          |                    | 49/524                 |                      | 38/524                    |                     |                                                   |                                      |                         |                           |                       |                                 |

| Reference                                  | Error incidence calculation            | Component Errors |                        |             | Dose / Calculation Errors |                     |                      | Aseptic Technique Errors             |                         |                           | Composite Errors      |                                 |
|--------------------------------------------|----------------------------------------|------------------|------------------------|-------------|---------------------------|---------------------|----------------------|--------------------------------------|-------------------------|---------------------------|-----------------------|---------------------------------|
|                                            |                                        | Wrong Drug       | Wrong Diluent Solution | Wrong Label | Wrong Dose                | Wrong Concentration | Wrong Diluent Volume | General Inadequate Aseptic Technique | Bacterial Contamination | Failure to Disinfect Vial | Improper Hand Hygiene | Any Admixture or Labeling Error |
|                                            | <b>Incidence:</b>                      |                  | <b>9.35%</b>           |             | <b>7.25%</b>              |                     |                      |                                      |                         |                           |                       |                                 |
|                                            | Numerator: Errors                      |                  |                        |             |                           |                     |                      |                                      |                         |                           |                       |                                 |
|                                            | Denominator: Doses prepared            |                  |                        |             |                           |                     |                      | 177/191                              |                         | 98/191                    |                       |                                 |
| <b>Helder et al. 2016[52]</b>              | <b>Incidence:</b>                      |                  |                        |             |                           |                     |                      | <b>92.67%</b>                        |                         | <b>51.31%</b>             |                       |                                 |
|                                            | Numerator: errors                      |                  |                        |             |                           |                     |                      |                                      |                         |                           |                       |                                 |
|                                            | Denominator: doses administered        |                  |                        |             | 14/99                     |                     |                      | 6/99                                 |                         |                           |                       |                                 |
| <b>Hoefel et al. 2006[33]</b>              | <b>Incidence:</b>                      |                  |                        |             | <b>14.10%</b>             |                     |                      | <b>6.10%</b>                         |                         |                           |                       |                                 |
|                                            | Numerator: positive bacterial cultures |                  |                        |             |                           |                     |                      |                                      |                         | Nursing ward: 1/92        |                       |                                 |
|                                            | Denominator: doses prepared            |                  |                        |             |                           |                     |                      |                                      |                         | Central pharmacy: 0/17    |                       |                                 |
| <b>Khalili et al. 2013[49]</b>             | <b>Incidence:</b>                      |                  |                        |             |                           |                     |                      |                                      |                         | <b>0.00–1.10%</b>         |                       |                                 |
|                                            | Numerator: positive bacterial cultures |                  |                        |             |                           |                     |                      |                                      |                         | 1/51                      |                       |                                 |
|                                            | Denominator: doses prepared            |                  |                        |             |                           |                     |                      |                                      |                         |                           |                       |                                 |
| <b>Macias et al. 2005[34]<sup>†</sup></b>  | <b>Incidence:</b>                      |                  |                        |             |                           |                     |                      |                                      |                         | <b>1.45%</b>              |                       |                                 |
|                                            | Numerator: errors                      |                  |                        |             |                           |                     |                      |                                      |                         |                           |                       |                                 |
|                                            | Denominator: 1000 doses prepared       |                  |                        |             |                           |                     |                      |                                      |                         |                           |                       | 0.66/1000                       |
| <b>MacKay et al. 2009[35]**</b>            | <b>Incidence:</b>                      |                  |                        |             |                           |                     |                      |                                      |                         |                           |                       | <b>0.07%</b>                    |
|                                            | Numerator: errors                      |                  |                        |             |                           |                     |                      | 5% relative error: 1/333             |                         |                           |                       |                                 |
|                                            | Denominator: doses prepared            |                  |                        |             |                           |                     |                      | 10% relative error: 4/333            |                         |                           |                       |                                 |
| <b>Masini et al. 2014[36]<sup>††</sup></b> | <b>Incidence:</b>                      |                  |                        |             |                           |                     |                      | <b>0.30%–1.20%</b>                   |                         |                           |                       |                                 |
|                                            | Numerator: errors                      |                  |                        |             |                           |                     |                      |                                      |                         |                           |                       |                                 |
|                                            | Denominator: doses prepared            | 8/425,683        | 3/425,683              |             | 857/425,683               |                     |                      |                                      |                         | 11/425,683                |                       | 2883/425,683                    |
| <b>Moniz et al. 2014[44]<sup>‡‡</sup></b>  |                                        |                  |                        |             |                           |                     |                      |                                      |                         |                           |                       |                                 |

| Reference                            | Error incidence calculation                       | Component Errors             |                             |             | Dose / Calculation Errors |                                       |                      | Aseptic Technique Errors             |                         |                                       | Composite Errors                     |                                 |
|--------------------------------------|---------------------------------------------------|------------------------------|-----------------------------|-------------|---------------------------|---------------------------------------|----------------------|--------------------------------------|-------------------------|---------------------------------------|--------------------------------------|---------------------------------|
|                                      |                                                   | Wrong Drug                   | Wrong Diluent Solution      | Wrong Label | Wrong Dose                | Wrong Concentration                   | Wrong Diluent Volume | General Inadequate Aseptic Technique | Bacterial Contamination | Failure to Disinfect Vial             | Improper Hand Hygiene                | Any Admixture or Labeling Error |
| Nguyen et al. 2014[45] <sup>88</sup> | <b>Incidence:</b>                                 | ~0.00%                       | ~0.00%                      |             | 0.20%                     |                                       |                      | ~0.00%                               |                         |                                       |                                      | 0.68%                           |
|                                      | Numerator: errors (including near-misses)         | ICU: 1/236                   |                             |             | ICU: 27/236               |                                       |                      |                                      |                         |                                       |                                      |                                 |
|                                      | Denominator: TOE (administered and omitted doses) | PSU: 1/280                   |                             |             | PSU: 17/280               |                                       |                      |                                      |                         |                                       |                                      | ICU: 159/236<br>PSU: 204/280    |
|                                      | <b>Incidence:</b>                                 | 0.36%–0.42%                  |                             |             | 6.10%–11.40%              |                                       |                      |                                      |                         |                                       |                                      | 67.3%–72.90%                    |
| Niemann et al. 2015[46]              | Numerator: errors                                 |                              |                             |             |                           |                                       | 115/233              |                                      |                         |                                       |                                      |                                 |
|                                      | Denominator: drug-handling processes              |                              | 38/233                      |             |                           |                                       |                      |                                      |                         |                                       |                                      | 138/233                         |
|                                      | <b>Incidence:</b>                                 |                              | 16.00%                      |             |                           |                                       | 49.00%               |                                      |                         |                                       |                                      | 59.00%                          |
| Ong et al. 2013[37]                  | Numerator: errors (including near-misses)         | 1/349                        | 1/349                       | 11/349      |                           |                                       | 61/349               |                                      | 307/349                 | 81/349                                |                                      |                                 |
|                                      | Denominator: doses administered                   |                              |                             |             |                           |                                       |                      |                                      |                         |                                       |                                      |                                 |
|                                      | <b>Incidence:</b>                                 | 0.28%                        | 0.28%                       | 3.20%       |                           |                                       | 17.50%               |                                      | 88.00%                  | 23.20%                                |                                      |                                 |
| Parshuram et al. 2006[38]            | Numerator: errors                                 |                              |                             |             |                           |                                       | 24/78                |                                      |                         |                                       |                                      |                                 |
|                                      | Denominator: infusion bags prepared               |                              |                             |             |                           |                                       |                      |                                      |                         |                                       |                                      |                                 |
|                                      | <b>Incidence:</b>                                 |                              |                             |             |                           |                                       | 31.00%               |                                      |                         |                                       |                                      |                                 |
| Rashed et al. 2016[53]               | Numerator: Errors (including near misses)         |                              | Theater: 0/98               |             |                           | Theater: 31/35<br>Nursing ward: 17/43 |                      | Theater: 25/98<br>Nursing ward: 1/55 |                         | Theater: 98/98<br>Nursing ward: 55/55 | Theater: 82/98<br>Nursing ward: 0/98 |                                 |
|                                      | Denominator: Doses prepared                       |                              | Nursing ward: 1/55          |             |                           |                                       |                      |                                      |                         |                                       |                                      |                                 |
|                                      | <b>Incidence:</b>                                 |                              | 0.00%–1.81%                 |             |                           | 39.53%–88.57%                         |                      | 1.81%–15.31%                         |                         | 100%–100%                             | 0.00%–83.67%                         |                                 |
| Reece et al. 2016[54]                | Numerator: Errors                                 | Self-reported: 1/15,843      | Self-reported: 4/15,843     |             | Self-reported: 7/15,843   |                                       |                      | Self-reported: 4/15,843              |                         |                                       |                                      |                                 |
|                                      | Denominator: Doses prepared:                      | Software reported: 52/51,037 | Software reported: 5/51,037 |             | Software reported: 797/   |                                       |                      | Software reported: 37/               |                         |                                       |                                      |                                 |
|                                      |                                                   |                              |                             |             |                           |                                       |                      |                                      |                         |                                       |                                      |                                 |

| Reference                                               | Error incidence calculation                                                                                 | Component Errors   |                        |             | Dose / Calculation Errors |                     |                      | Aseptic Technique Errors             |                         |                           | Composite Errors      |                                 |
|---------------------------------------------------------|-------------------------------------------------------------------------------------------------------------|--------------------|------------------------|-------------|---------------------------|---------------------|----------------------|--------------------------------------|-------------------------|---------------------------|-----------------------|---------------------------------|
|                                                         |                                                                                                             | Wrong Drug         | Wrong Diluent Solution | Wrong Label | Wrong Dose                | Wrong Concentration | Wrong Diluent Volume | General Inadequate Aseptic Technique | Bacterial Contamination | Failure to Disinfect Vial | Improper Hand Hygiene | Any Admixture or Labeling Error |
|                                                         |                                                                                                             |                    |                        |             | 51,037                    |                     | 51,037               |                                      |                         |                           |                       |                                 |
|                                                         | <b>Incidence:</b>                                                                                           | <b>~0.00–0.01%</b> | <b>0.01%–0.03%</b>     |             | <b>0.04%–1.56%</b>        |                     | <b>0.03%–0.07%</b>   |                                      |                         |                           |                       |                                 |
| <b>Rodriguez-Gonzalez et al. 2012[39]<sup>III</sup></b> | Numerator: errors (including near-misses)<br>Denominator: TOE (observed administrations plus omitted doses) |                    | 8/402                  |             |                           |                     | 32/402               |                                      |                         |                           |                       |                                 |
|                                                         | <b>Incidence:</b>                                                                                           |                    | <b>1.99%</b>           |             |                           |                     | <b>7.96%</b>         |                                      |                         |                           |                       |                                 |
| <b>Sacks et al. 2009[40]</b>                            | Numerator: errors<br>Denominator: doses prescribed                                                          |                    |                        |             |                           |                     |                      |                                      |                         |                           |                       | 18/4730                         |
|                                                         | <b>Incidence</b>                                                                                            |                    |                        |             |                           |                     |                      |                                      |                         |                           |                       | <b>0.38%</b>                    |
| <b>Seger et al. 2012[41]<sup>II</sup></b>               | Numerator: errors<br>Denominator: doses prepared                                                            | 3/1421             |                        |             |                           | 23/184              |                      |                                      |                         |                           |                       |                                 |
|                                                         | <b>Incidence:</b>                                                                                           | <b>0.21%</b>       |                        |             |                           | <b>12.50%</b>       |                      |                                      |                         |                           |                       |                                 |
| <b>Skouroliakou et al. 2005[42]</b>                     | Numerator: errors<br>Denominator: solutions prepared                                                        |                    |                        |             |                           | 20/941              | 8/941                |                                      |                         |                           |                       |                                 |
|                                                         | <b>Incidence:</b>                                                                                           |                    |                        |             |                           | <b>2.13%</b>        | <b>0.85%</b>         |                                      |                         |                           |                       |                                 |
| <b>Tavakoli-Ardakani et al. 2013[47]<sup>III</sup></b>  | Numerator: errors<br>Denominator: TOE                                                                       |                    |                        |             |                           |                     |                      |                                      |                         |                           |                       | 2705/8322                       |
|                                                         | <b>Incidence:</b>                                                                                           |                    |                        |             |                           |                     |                      |                                      |                         |                           |                       | <b>32.50%</b>                   |
| <b>Terkola et al. 2017[56]</b>                          | Numerator: Errors<br>Denominator: Preparations                                                              |                    |                        |             |                           | 59,890/759,060      |                      |                                      |                         |                           |                       |                                 |
|                                                         | <b>Incidence:</b>                                                                                           |                    |                        |             |                           | <b>7.89%</b>        |                      |                                      |                         |                           |                       |                                 |

| Reference                      | Error incidence calculation                                                                                            | Component Errors |                        |             | Dose / Calculation Errors |                     |                      | Aseptic Technique Errors             |                         |                           | Composite Errors      |                                 |
|--------------------------------|------------------------------------------------------------------------------------------------------------------------|------------------|------------------------|-------------|---------------------------|---------------------|----------------------|--------------------------------------|-------------------------|---------------------------|-----------------------|---------------------------------|
|                                |                                                                                                                        | Wrong Drug       | Wrong Diluent Solution | Wrong Label | Wrong Dose                | Wrong Concentration | Wrong Diluent Volume | General Inadequate Aseptic Technique | Bacterial Contamination | Failure to Disinfect Vial | Improper Hand Hygiene | Any Admixture or Labeling Error |
| van den Heever et al. 2016[57] | Numerator: Errors<br>Denominator: Sampled preparations<br><b>Incidence:</b>                                            |                  |                        | 0-101/110   |                           |                     |                      |                                      | 7/110                   |                           |                       |                                 |
| Westbrook et al. 2011[3]       | Numerator: errors (including near-misses)<br>Denominator: doses administered<br><b>Incidence:</b>                      | 1/568            | 21/568                 |             |                           |                     | 121/568              |                                      |                         |                           |                       |                                 |
| Wheeler et al. 2008[43]        | Numerator: errors<br>Denominator: syringes prepared<br><b>Incidence:</b>                                               |                  |                        | 88/149      |                           |                     |                      |                                      |                         |                           |                       |                                 |
| Yin et al. 2016[55]***         | Numerator: Doses with ≥1 errors<br>Denominator: TOE (observed administrations plus omitted doses)<br><b>Incidence:</b> | 0/122            |                        | 15/122      | 1/122                     |                     | 14/122               |                                      |                         |                           |                       | 69/122                          |

\* Crill et al. 2010[29]. Authors speculate that contamination arose during preparation, but note that it may also have occurred during or after administration.

† Dehmel et al. 2011[30]. Results presented for automated preparation in the centralized pharmacy.

‡ Dehmel et al. 2011[30]. Results presented for manual preparation in the nursing ward.

§ Ding et al. 2015[48]. Wrong dose error rate combines wrong dose, omission, and extra dose.

¶ Fahimi et al. 2008[32]. Wrong dose and wrong diluent volume were combined into 1 value in the original article.

|| Macias et al. 2005[34]. This study was designed to observe a sepsis outbreak. Only baseline (pre-outbreak) data are presented in this table.

\*\* MacKay et al. 2009[35]. This study tested automation as an intervention. Only baseline data is presented in this table.

†† Masini et al. 2014[36]. Results presented for manual preparation only.

‡‡ Moniz et al. 2014[44]. Wrong volume of drug/diluent (detectable by previous practices), wrong drug volume (not detectable by previous practices), and wrong diluent volume (not detectable by previous practices) are combined in this table as wrong dose.

§§ Nguyen et al. 2014[45]. This was an interventional study. Only baseline data is presented in this table.

¶¶ Rodriguez-Gonzalez et al. 2012[39]. Errors were defined as "wrong reconstitution (volume, fluid)," which is reported in this table as wrong diluent solution, and "wrong dilution (volume, fluid)," which is reported in this table as wrong diluent volume.



1  
2  
3  
4  
5  
6  
7  
8  
9  
10  
11  
12  
13  
14  
15  
16  
17  
18  
19  
20  
21  
22  
23  
24  
25  
26  
27  
28  
29  
30  
31  
32  
33  
34  
35  
36  
37  
38  
39  
40  
41  
42  
43  
44  
45  
46  
47  
48  
49

|| Seger et al. 2012[41]. Results presented for manual preparation only. Wrong dose and wrong diluent were reported as a combined value in the original article.  
\*\*\* Yin et al. 2016[55]. One preparation out of 122 was subcutaneous rather than IV. Denominator for concentration errors is IV preparations only.  
††† Tavakoli-Ardakani et al. 2013[47]. This study reported that additional data was collected by error subcategory; however, these data are not present in the available publication.  
Unless otherwise noted, all data reported from interventional studies are from the baseline period only.

FR, France; GER, Germany; ICU, intensive care unit; PSU, post-surgical unit; TOE, total opportunities for error; UK, United Kingdom

For peer review only

1  
2  
3 1 The error subtype of wrong drug selection was infrequent,[3, 25, 28, 31, 37, 41, 44, 45,  
4  
5 2 54, 55] with the highest reported rate of 4.7% of total doses.[31] Selection of a wrong diluent  
6  
7 3 solution was reported to have occurred in 9 of 34 publications (26%), with results varying across  
8  
9 4 studies (~0% to 49.0%).[3, 28, 32, 37, 39, 44, 46, 53, 54] Of note, the multicenter, multinational  
10  
11 5 study by Cousins et al[28] reported that 1.0% to 49.0% of doses administered had been prepared  
12  
13 6 with an incorrect diluent across all study sites. This range is wider than that of the other included  
14  
15 7 studies (0% to 16.0%). Labeling errors were reported in 6 publications (18%), with reported  
16  
17 8 incidence varying substantially, ranging from 0% to 99.0% (20.0% to 99.0% within the study by  
18  
19 9 Cousins et al[28] and 0% to 91.8% in the study by van den Heever et al study[57]).[28, 31, 37,  
20  
21 10 43, 55, 57]

22  
23  
24  
25  
26  
27  
28 11 Eleven publications (32%) captured incidence of wrong dose, and while most of these  
29  
30 12 studies reported incidence rates below 10%,[25, 28, 32, 33, 44, 45, 48, 51, 54, 55] 1 study did  
31  
32 13 report an incidence rate over 32%.[31] Wrong drug concentration errors were reported in 10  
33  
34 14 publications (29%), with error incidence per total number of IV doses prepared ranging from  
35  
36 15 0.3% to 88.6%.[27, 30, 36, 38, 41, 42, 51, 53, 55, 56] While some studies defined a  
37  
38 16 concentration error based on a threshold of a 5%[30, 36, 41] or 10%[30, 36, 38, 51, 55] deviation  
39  
40 17 between the prepared dose and the ideal dose, the study by Castagne et al used a higher threshold  
41  
42 18 of 20%.[27]

43  
44  
45  
46  
47 19 Eight studies (24%) reported errors pertaining to wrong diluent volume,[3, 28, 33, 37, 39,  
48  
49 20 42, 46, 54] with half explicitly defining this error subgroup as any deviation from manufacturer  
50  
51 21 or accepted institutional guidelines for IV preparation.[3, 37, 39, 46] The highest-reported error  
52  
53 22 rate (49.0%) was identified by Niemann and colleagues,[46] while the lowest-reported incidence  
54  
55 23 (0.6%) was from a study by Reece et al.[54]

1  
2  
3 1 Reported challenges with aseptic technique included general aseptic technique deviations,  
4  
5  
6 2 bacterial contamination, failure to disinfect the vial, and improper hand hygiene. In studies that  
7  
8 3 reported general inadequate aseptic technique deviations, 3 studies reported incidence rates  
9  
10 4 below 5% (range: 0% to 3.3%)[29, 44, 53]; however, the study by Bertsche and colleagues[26]  
11  
12 5 reported an incidence rate of just under 70% and findings from Helder et al indicated a 92.7%  
13  
14 6 nonadherence rate to hygiene protocols.[52] The variation in incidence rates presented may be  
15  
16 7 the result of differences in error definitions, as Bertsche and colleagues assessed aseptic  
17  
18 8 technique deviations as any procedural deviation from local hygiene guidelines[26] and a study  
19  
20 9 by Helder et al required all 5 steps of the hygiene protocol to be followed.[52] The other studies  
21  
22 10 defined aseptic technique errors either based on bacterial cultures[29, 34] or report of syringes  
23  
24 11 left uncapped during the preparation process.[44]  
25  
26  
27  
28  
29

30 12 Bacterial contamination errors were reported in 4 studies, with all reporting incidence  
31  
32 13 under 7% (**Table 3**).[29, 34, 49, 57] Four additional studies report error incidence for both  
33  
34 14 failure to disinfect the vial[28, 37, 52, 53] and improper hand hygiene.[28, 37, 53] In particular,  
35  
36 15 the study by Cousins and colleagues[28] presents a wide range of incidence across aseptic  
37  
38 16 technique subtypes (**Table 3**). The study by Cousins et al[28] presented data from 3 separate  
39  
40 17 institutions located in France, Germany, and the United Kingdom, with the incidence of aseptic  
41  
42 18 technique errors from the French institution found to be dramatically lower (4.0% for vial  
43  
44 19 disinfection and 9.0% for hand washing). Of note, the authors attribute this difference to the  
45  
46 20 French institution having undergone a recent update to its aseptic preparation methods protocol  
47  
48 21 due to a prior outbreak of Legionnaire's disease within the facility.[28]  
49  
50  
51  
52  
53  
54  
55  
56  
57  
58  
59  
60

1  
2  
3 1 Ten (29%) studies reported an overall incidence of IAPes that combined multiple error  
4  
5  
6 2 subtypes.[25, 35, 40, 44-48, 50, 55] These studies have diverse error definitions and error  
7  
8 3 detection methods; thus, the error incidence ranges widely (0.07% to 72.9%).  
9

#### 10 4 **DISCUSSION**

11  
12  
13  
14 5 This systematic review found that IAPes are ubiquitous across countries and hospital locations,  
15  
16 6 and that the types of errors observed and reported are diverse. Reported error incidence was  
17  
18 7 found to vary widely not only between settings (central pharmacies or nursing wards) but also  
19  
20 8 within these settings across studies. Variability in error detection methods and definitions applied  
21  
22 9 may contribute to the variation in error rates reported across studies.  
23  
24

25  
26  
27 10 This review identified studies conducted in Europe, North America, South America,  
28  
29 11 Asia, and Africa. While different regions, countries, and even individual institutions are likely to  
30  
31 12 have somewhat different standards and practices for IV admixture preparation, differences in  
32  
33 13 methods and terms applied for data collection did not seem to vary any greater between countries  
34  
35 14 than within a single country. In theory, variation among institutions within the same country has  
36  
37 15 the potential to be larger than variation among countries, as local practices may be more flexible  
38  
39 16 than nationally adopted standards. ISMP noted in its 2011 Guidelines for the Safe Preparation of  
40  
41 17 Sterile Compounds that IV admixture preparation practices are complex, and documentation of  
42  
43 18 errors varies widely across the United States.[58] This highlights an important need for national  
44  
45 19 and international consensuses on defining and identifying IAPes to fully understand the global  
46  
47 20 patient burden.  
48  
49  
50

51  
52  
53 21 Some evidence indicates the effect of location and method of IV admixture preparation  
54  
55 22 on the incidence of errors. In particular, error rates appear to be lower when IV preparation takes  
56  
57  
58  
59  
60

1  
2  
3 1 place in central pharmacy settings compared with nursing wards, and lower with automated  
4  
5 2 versus manual preparation. Among studies meeting the inclusion criteria for this systematic  
6  
7 3 review, Dehmel and colleagues[30] and Khalili et al[49] directly compared error rates identified  
8  
9 4 from a central pharmacy to those from a nursing ward using consistent IAPE definitions across  
10  
11 5 settings. The study by Dehmel et al reported a markedly higher rate of wrong concentration  
12  
13 6 errors using manual preparation in a nursing ward when compared with automated preparation in  
14  
15 7 a central pharmacy (53% vs 16%, respectively).[30] Khalili and colleagues reported a low rate of  
16  
17 8 bacterial contamination (1.1%) in admixtures prepared on nursing wards, with no instances of  
18  
19 9 contamination in admixtures prepared in central pharmacies, despite use of manual preparation  
20  
21 10 techniques in each setting.[49] Caution should be taken in generalizing this finding, given the  
22  
23 11 limited sample size of 17 preparations in the central pharmacy and 97 on the nursing ward.[49]  
24  
25 12 Thus, while it appears that moving IV admixture preparation away from the site of care and  
26  
27 13 using automated technologies may reduce IAPes, further empirical studies are required to  
28  
29 14 substantiate this hypothesis.  
30  
31  
32  
33  
34  
35  
36

37 15 In the present systematic review of IAPes, a patchwork of data emerged from the  
38  
39 16 relevant available literature, in part because no single study design or observational technique is  
40  
41 17 ideal for capturing all the aspects of IV admixture preparation that could result in an error. The  
42  
43 18 majority of studies relied on direct observation of the IV admixture preparation process by a  
44  
45 19 trained observer, while other studies used bacterial culture, measurement of the final admixture  
46  
47 20 concentration, incident reports, and cross-checking against a checklist, computed calculation, or  
48  
49 21 other benchmarks. However, certain error subtypes naturally lent themselves to a specific  
50  
51 22 observational technique, such as bacterial culture for assessing bacterial contamination,  
52  
53  
54  
55  
56  
57  
58  
59  
60

1 laboratory testing for concentration errors, and direct observation for aseptic technique  
2 deviations.

3 The framework used for categorizing IAPes in this review was developed to facilitate the  
4 aggregation of data collected across studies. While inconsistency across reported error  
5 definitions precluded additional quantitative aggregation, we hope the classification system used  
6 herein is informative to researchers designing future studies, and may help to facilitate more  
7 effective standardization of error reporting going forward.

8 Within IAPE subtypes, the method of error calculation varied in some cases, which  
9 impacted the ability to generalize results across studies. The majority of studies reported the  
10 incidence as errors per doses prescribed, prepared, or administered. However, 5 (15%) studies  
11 reported errors per total opportunities for error[39, 45, 47, 48, 55] and 2 (6%) studies reported  
12 errors per total drug-handling processes.[26, 46] While using total opportunities for error or  
13 drug-handling processes may be insightful for those wishing to understand and optimize the IV  
14 medication use cycle from the user perspective, errors per dose may be a more useful  
15 measurement for researchers interested in patient impact and outcomes.

16 Error definitions were also variable within some error subtypes. For instance, thresholds  
17 for determining concentration errors ranged from  $\pm 5\%$  variance from the label specification to as  
18 high as  $\pm 20\%$  variance.[27, 30, 36, 38, 41, 42, 51, 53, 55, 56] Studies reporting IAPE incidence  
19 based on a composite of IAPE subtypes were often composed of common elements (eg, wrong  
20 drug, wrong concentration), but were sufficiently different that they could not be directly  
21 compared. This finding exposes a need for a standardized taxonomy of error subtypes that can be  
22 used across a variety of research settings and countries to facilitate meaningful comparisons.

1  
2  
3 1 Other factors that may impact error incidence are circumstances, such as either a recent  
4  
5 2 training or sentinel event as described by a study by Cousins et al,[28] when commenting on  
6  
7 3 proportionally lower aseptic technique deviations observed in the French study site. It was  
8  
9 4 suggested that this finding may be attributed to recent staff training and updated guidelines in the  
10  
11 5 French institution included in the study, prompted by a recent outbreak of Legionnaire's disease  
12  
13 6 at that site. This highlights the impact of staff training not only as a source of potential regional  
14  
15 7 or institutional error variation, but also as a means of reducing error rates. Given the short  
16  
17 8 duration between staff training and study implementation, the long-term sustainability of error  
18  
19 9 reduction potentially gained by staff training in the study by Cousins et al was unclear.  
20  
21  
22  
23  
24

25 10 In addition to heterogeneous error incidence results, the articles captured in this  
26  
27 11 systematic review used a variety of approaches to measuring the potential burden of patient  
28  
29 12 harm. Several studies used the existing NCC MERP error index[17] to rate and score errors, and  
30  
31 13 the majority of other studies relied on either local clinician opinion or expert panel. As a result,  
32  
33 14 there is a high degree of variability in terms of how the errors are scored and how potential for  
34  
35 15 patient risk is attributed.  
36  
37  
38  
39

40 16 Of the 34 studies included in this review, 12 (35%) provided estimates or general  
41  
42 17 assessments for potentially attributable patient harm or clinical relevance for IAPs,[3, 26, 29,  
43  
44 18 31, 32, 39-41, 44-46, 48]. Effective and standardized traceability measures are required to link a  
45  
46 19 defect in the admixture process that occurs early within the medication use cycle with later  
47  
48 20 negative patient outcomes. Given the separation in time and physical location between admixture  
49  
50 21 preparation and potential patient physical adverse response, it can be challenging to link potential  
51  
52 22 negative patient outcomes to the admixture/compounding process where unrecognized potential  
53  
54  
55  
56  
57  
58  
59  
60

1 errors may exist.[12] There is a need for robust study designs that allow for the assessment of the  
2 association between specific errors incidences and patient outcomes.

3         Several limitations were present in this systematic review. Our search strategy targeted  
4 the broad medical literature, but inclusion of additional databases, such as the Cumulative Index  
5 of Nursing and Allied Health Literature, may have added nursing publications relevant to this  
6 topic. While the quality of publications was generally fair, only 5 studies (15%) were deemed to  
7 be of good quality in terms of methodology and reporting.[30, 34, 38, 45, 46] Furthermore, the  
8 Hawker method of quality ascertainment is generic and may not be best suited to capturing the  
9 unique challenges of this research topic. Drawing comparisons between the studies remains  
10 difficult due to substantial variations in error definitions. As a result, meta-analysis of the current  
11 IAPE literature was not considered appropriate. Lastly, in the majority of studies, documentation  
12 of error severity and associated burden of harm was not sufficient to allow for a thorough  
13 evaluation of the impact on patient care or the consequences for healthcare facilities.

## 14 **CONCLUSIONS**

15 This systematic review is the first to categorize IAPes according to the characteristics of the  
16 error and the location and method of IV preparation. It is our hope that future studies may use  
17 these categorizations to provide a meaningful framework to assess IAPes within their procedural  
18 context. With improved standardization of IAPE definitions, grouping error subtypes as we have  
19 done may facilitate an improved understanding of where errors happen within the IV preparation  
20 process and devising solutions to help eradicate them. There is a clear potential burden of harm  
21 for patients resulting from IAPes, and thus a need to continue to optimize the IV preparation  
22 process, focusing on improving preparation workflow, designing and implementing preventive  
23 strategies, staff training, and implementing process standardization where possible. Future



1  
2  
3 1 research should focus on the development of consistent error subtype definitions and a  
4  
5  
6 2 standardized reporting methodology as well as reliable and reproducible methods to track and  
7  
8 3 link risk factors and the burden of harm associated with these errors.  
9

## 10 11 12 13 14 15 16 17 6 **Acknowledgements**

18  
19  
20 7 The authors would like to thank Diane Nitzki-George and Denise Hefley of DNG Consulting for  
21  
22 8 their assistance rendered in this study. Editorial assistance was provided by Oxford  
23  
24  
25 9 PharmaGenesis Inc. and was funded by Baxter Healthcare Corporation.  
26

## 27 28 10 **Data Sharing Statement**

29  
30  
31 11 As the research presented is a systematic literature review of published data, no additional  
32  
33 12 unpublished data are available.  
34

## 35 36 13 **Funding**

37  
38  
39 14 This study was sponsored by Baxter Healthcare Corporation.  
40

## 41 15 **Contributors**

42  
43  
44 16 NH: Concept/design, data analysis/interpretation, critical revision of article, approval of article.  
45

46  
47 17 IB: Data interpretation, critical revision of article, approval of article.  
48

49  
50 18 T H-T: Concept/design, data interpretation, critical revision of article, approval of article.  
51

52  
53 19 PT: Concept/design, data interpretation, critical revision of article, approval of article.  
54

## 55 56 20 **Competing Interests** 57 58 59 60

1  
2  
3 1 NH is a former employee and stockholder of Baxter Healthcare Corporation.  
4

5  
6 2 IB is an employee and stockholder of Baxter Healthcare Corporation.  
7

8  
9 3 T H-T has no relevant competing interests to disclose.  
10

11 4 PT is currently under contract to perform other work for Baxter Healthcare Corporation that is

12  
13  
14 5 unrelated to the current manuscript.  
15

16  
17 6  
18

19 7  
20  
21  
22  
23  
24  
25  
26  
27  
28  
29  
30  
31  
32  
33  
34  
35  
36  
37  
38  
39  
40  
41  
42  
43  
44  
45  
46  
47  
48  
49  
50  
51  
52  
53  
54  
55  
56  
57  
58  
59  
60

1  
2  
3 1 REFERENCES  
4

- 5  
6 2 1. Leape LL, Brennan TA, Laird N, et al. The nature of adverse events in hospitalized  
7  
8 3 patients. Results of the Harvard Medical Practice Study II. *N Engl J Med* 1991;324:377-  
9  
10 4 84.
- 11  
12 5 2. Phillips J, Beam S, Brinker A, et al. Retrospective analysis of mortalities associated with  
13  
14 6 medication errors. *Am J Health Syst Pharm* 2001;58:1835-41.
- 15  
16 7 3. Westbrook JI, Rob MI, Woods A, et al. Errors in the administration of intravenous  
17  
18 8 medications in hospital and the role of correct procedures and nurse experience. *BMJ*  
19  
20 9 *Qual Saf* 2011;20:1027-34.
- 21  
22 10 4. ISMP Canada. Managing overfill during preparation and delivery of intravenous  
23  
24 11 medications. *ISMP Canada Safety Bulletin* 2013;13(7). [https://www.ismp-](https://www.ismp-canada.org/download/safetyBulletins/2013/ISMPCSB2013-07_ManagingOverfillIntravenousMedications.pdf)  
25  
26 12 [canada.org/download/safetyBulletins/2013/ISMPCSB2013-](https://www.ismp-canada.org/download/safetyBulletins/2013/ISMPCSB2013-07_ManagingOverfillIntravenousMedications.pdf)  
27  
28 13 [07\\_ManagingOverfillIntravenousMedications.pdf](https://www.ismp-canada.org/download/safetyBulletins/2013/ISMPCSB2013-07_ManagingOverfillIntravenousMedications.pdf) (accessed 13 June 2017).
- 29  
30 14 5. Flynn EA, Pearson RE, Barker KN. Observational study of accuracy in compounding i.v.  
31  
32 15 admixtures at five hospitals. *Am J Health Syst Pharm* 1997;54:904-12.
- 33  
34 16 6. The National Coordinating Council for Medication Error Reporting and Prevention. The  
35  
36 17 Council: Moving into the Second Decade "Developing Recommendations and Offering  
37  
38 18 Tools." 2010. [http://www.nccmerp.org/sites/default/files/fifteen\\_year\\_report.pdf](http://www.nccmerp.org/sites/default/files/fifteen_year_report.pdf)  
39  
40 19 (accessed 13 Jun 2017).
- 41  
42 20 7. Pedersen CA, Schneider PJ, Scheckelhoff DJ. ASHP national survey of pharmacy  
43  
44 21 practice in hospital settings: Dispensing and administration—2014. *Am J Health Syst*  
45  
46 22 *Pharm* 2015;72:1119-37.
- 47  
48  
49  
50  
51  
52  
53  
54  
55  
56  
57  
58  
59  
60

- 1  
2  
3 1 8. Speth SL, Fields DB, Schlemmer CB, et al. Optimizing i.v. workflow. *Am J Health Syst*  
4  
5  
6 2  
7  
8 3 9. Leape LL, Bates DW, Cullen DJ, et al. Systems analysis of adverse drug events. *JAMA*  
9  
10 4  
11 1995;274:35-43.  
12  
13 5 10. Bates DW, Boyle DL, Vander Vliet MB, et al. Relationship between medication errors  
14  
15 6  
16 and adverse drug events. *J Gen Intern Med* 1995;10:199-205.  
17  
18 7 11. Walsh KE, Dodd KS, Seetharaman K, et al. Medication errors among adults and children  
19  
20 8  
21 with cancer in the outpatient setting. *J Clin Oncol* 2009;27:891-6.  
22  
23 9 12. White R, Cassano-Piche A, Fields A, et al. Intravenous chemotherapy preparation errors:  
24  
25 10  
26 patient safety risks identified in a pan-Canadian exploratory study. *J Oncol Pharm Pract*  
27  
28 11  
29 2014;20:40-6.  
30  
31 12 13. Walsh KE, Kaushal R, Chessare JB. How to avoid paediatric medication errors: a user's  
32  
33 13  
34 guide to the literature. *Arch Dis Child* 2005;90:698-702.  
35  
36 14 14. Bertoglio S, Rezzo R, Merlo FD, et al. Pre-filled normal saline syringes to reduce totally  
37  
38 15  
39 implantable venous access device-associated bloodstream infection: a single institution  
40  
41 16  
42 pilot study. *J Hosp Infect* 2013;84:85-8.  
43  
44 17 15. Macias AE, Huertas M, de Leon SP, et al. Contamination of intravenous fluids: a  
45  
46 18  
47 continuing cause of hospital bacteremia. *Am J Infect Control* 2010;38:217-21.  
48  
49 19 16. ISMP List of High-Alert Medications in Acute Care Settings. 2014.  
50  
51 20  
52 <https://www.ismp.org/tools/institutionalhighAlert.asp> (accessed 13 Jun 2017).  
53  
54 21 17. NCC MERP Index for Categorizing Medication Errors. 2001.  
55  
56 22  
57 <http://www.nccmerp.org/sites/default/files/indexBW2001-06-12.pdf> (accessed 13 Jun  
58  
59 23  
60 2017).

- 1  
2  
3 1 18. Cousins DH, Gerrett D, Warner B. A review of medication incidents reported to the  
4  
5  
6 2 National Reporting and Learning System in England and Wales over 6 years (2005-  
7  
8 3 2010). *Br J Clin Pharmacol* 2012;74:597-604.  
9  
10 4 19. Abbasinazari M, Zareh-Toranposhti S, Hassani A, et al. The effect of information  
11  
12 5 provision on reduction of errors in intravenous drug preparation and administration by  
13  
14 6 nurses in ICU and surgical wards. *Acta Med Iran* 2012;50:771-7.  
15  
16 7 20. Chua SS, Tea MH, Rahman MH. An observational study of drug administration errors in  
17  
18 8 a Malaysian hospital (study of drug administration errors). *J Clin Pharm Ther*  
19  
20 9 2009;34:215-23.  
21  
22 10 21. Prot S, Fontan JE, Alberti C, et al. Drug administration errors and their determinants in  
23  
24 11 pediatric in-patients. *Int J Qual Health Care* 2005;17:381-9.  
25  
26 12 22. Moher D, Liberati A, Tetzlaff J, et al. Preferred reporting items for systematic reviews  
27  
28 13 and meta-analyses: the PRISMA statement. *PLoS Med* 2009;6:e1000097.  
29  
30 14 23. Hawker S, Payne S, Kerr C, et al. Appraising the evidence: reviewing disparate data  
31  
32 15 systematically. *Qual Health Res* 2002;12:1284-99.  
33  
34 16 24. Green J, Jester R, McKinley R, et al. The impact of chronic venous leg ulcers: a  
35  
36 17 systematic review. *J Wound Care* 2014;23:601-12.  
37  
38 18 25. Anselmi ML, Peduzzi M, Dos Santos CB. Errors in the administration of intravenous  
39  
40 19 medication in Brazilian hospitals. *J Clin Nurs* 2007;16:1839-47.  
41  
42 20 26. Bertsche T, Niemann D, Mayer Y, et al. Prioritising the prevention of medication  
43  
44 21 handling errors. *Pharm World Sci* 2008;30:907-15.  
45  
46  
47  
48  
49  
50  
51  
52  
53  
54  
55  
56  
57  
58  
59  
60

- 1  
2  
3 1 27. Castagne V, Habert H, Abbara C, et al. Cytotoxics compounded sterile preparation  
4 control by HPLC during a 16-month assessment in a French university hospital:  
5 importance of the mixing bags step. *J Oncol Pharm Pract* 2011;17:191-6.  
6  
7  
8 2 28. Cousins DH, Sabatier B, Begue D, et al. Medication errors in intravenous drug  
9 preparation and administration: a multicentre audit in the UK, Germany and France. *Qual*  
10 *Saf Health Care* 2005;14:190-5.  
11  
12  
13 3 29. Crill CM, Hak EB, Robinson LA, et al. Evaluation of microbial contamination associated  
14 with different preparation methods for neonatal intravenous fat emulsion infusion. *Am J*  
15 *Health Syst Pharm* 2010;67:914-8.  
16  
17  
18 4 30. Dehmel C, Braune SA, Kreymann G, et al. Do centrally pre-prepared solutions achieve  
19 more reliable drug concentrations than solutions prepared on the ward? *Intensive Care*  
20 *Med* 2011;37:1311-6.  
21  
22  
23 5 31. Fahimi F, Sistanizad M, Abrishami R, et al. An observational study of errors related to  
24 the preparation and administration of medications given by infusion devices in a teaching  
25 hospital. *Iran J Pharm Res* 2007;6:295-99.  
26  
27  
28 6 32. Fahimi F, Ariapanah P, Faizi M, et al. Errors in preparation and administration of  
29 intravenous medications in the intensive care unit of a teaching hospital: an observational  
30 study. *Aust Crit Care* 2008;21:110-6.  
31  
32  
33 7 33. Hoefel HH, Lautert L. Errors committed by nursing technicians and assistants in  
34 administering antibiotics. *Am J Infect Control* 2006;34:437-42.  
35  
36  
37 8 34. Macias AE, Munoz JM, Galvan A, et al. Nosocomial bacteremia in neonates related to  
38 poor standards of care. *Pediatr Infect Dis J* 2005;24:713-6.  
39  
40  
41  
42  
43  
44  
45  
46  
47  
48  
49  
50  
51  
52  
53  
54  
55  
56  
57  
58  
59  
60

- 1  
2  
3 1 35. Mackay MW, Cash J, Farr F, et al. Improving Pediatric Outcomes through Intravenous  
4 and Oral Medication Standardization. *J Pediatr Pharmacol Ther* 2009;14:226-35.  
5  
6 2  
7  
8 3 36. Masini C, Nanni O, Antaridi S, et al. Automated preparation of chemotherapy: quality  
9 improvement and economic sustainability. *Am J Health Syst Pharm* 2014;71:579-85.  
10  
11 4  
12  
13 5 37. Ong WM, Subasyini S. Medication errors in intravenous drug preparation and  
14 administration. *Med J Malaysia* 2013;68:52-7.  
15  
16 6  
17  
18 7 38. Parshuram CS, Dupuis LL, To T, et al. Occurrence and impact of unanticipated variation  
19 in intravenous methotrexate dosing. *Ann Pharmacother* 2006;40:805-11.  
20  
21 8  
22  
23 9 39. Rodriguez-Gonzalez CG, Herranz-Alonso A, Martin-Barbero ML, et al. Prevalence of  
24 medication administration errors in two medical units with automated prescription and  
25 dispensing. *J Am Med Inform Assoc* 2012;19:72-8.  
26  
27 10  
28  
29 11  
30  
31 12 40. Sacks GS, Rough S, Kudsk KA. Frequency and severity of harm of medication errors  
32 related to the parenteral nutrition process in a large university teaching hospital.  
33  
34 13  
35 14  
36 15 41. Seger AC, Churchill WW, Keohane CA, et al. Impact of robotic antineoplastic  
37 preparation on safety, workflow, and costs. *J Oncol Pract* 2012;8:344-49.  
38  
39 16  
40  
41 17 42. Skouroliakou M, Konstantinou D, Papasarantopoulos P, et al. Computer assisted total  
42 parenteral nutrition for pre-term and sick term neonates. *Pharm World Sci* 2005;27:305-  
43  
44 18  
45 19  
46 10.  
47  
48 20 43. Wheeler DW, Degnan BA, Sehmi JS, et al. Variability in the concentrations of  
49 intravenous drug infusions prepared in a critical care unit. *Intensive Care Med*  
50  
51 21  
52  
53 22  
54 2008;34:1441-7.  
55  
56  
57  
58  
59  
60

- 1  
2  
3 1 44. Moniz TT, Chu S, Tom C, et al. Sterile product compounding using an i.v. compounding  
4 workflow management system at a pediatric hospital. *Am J Health Syst Pharm*  
5  
6 2  
7  
8 3  
9  
10 4 45. Nguyen HT, Pham HT, Vo DK, et al. The effect of a clinical pharmacist-led training  
11 programme on intravenous medication errors: a controlled before and after study. *BMJ*  
12  
13 5  
14  
15 6  
16  
17 7 46. Niemann D, Bertsche A, Meyrath D, et al. A prospective three-step intervention study to  
18 prevent medication errors in drug handling in paediatric care. *J Clin Nurs* 2015;24:101-  
19  
20 8  
21  
22 9  
23  
24 10 47. Tavakoli-Ardakani M, Omidi S, Eshraghi A, et al. Medication errors in administration of  
25  
26 11  
27  
28  
29 12 48. Ding Q, Barker K, Flynn E, et al. Incidence of intravenous medication errors in a chinese  
30  
31 13  
32  
33  
34 14 49. Khalili H, Sheikhabayi M, Samadi N, et al. Bacterial contamination of single- and  
35  
36 15  
37  
38  
39 16  
40  
41 17 50. Aruna C, Nagaraju A, Swathi K, et al. Errors in the intravenous drug administration in  
42  
43 18  
44  
45  
46 19  
47  
48 20 51. Campino A, Arranz C, Unceta M, et al. Medicine preparation errors in ten Spanish  
49  
50 21  
51  
52  
53 22 52. Helder OK, Kornelisse RF, Reiss IK, et al. Disinfection practices in intravenous drug  
54  
55 23  
56  
57  
58  
59  
60



- 1  
2  
3 1 53. Rashed AN, Tomlin S, Aguado V, et al. Sources and magnitude of error in preparing  
4  
5 2 morphine infusions for nurse-patient controlled analgesia in a UK paediatric hospital. *Int*  
6  
7 3 *J Clin Pharm* 2016;38:1069-74.  
8  
9  
10 4 54. Reece KM, Lozano MA, Roux R, et al. Implementation and evaluation of a gravimetric  
11  
12 5 i.v. workflow software system in an oncology ambulatory care pharmacy. *Am J Health*  
13  
14 6 *Syst Pharm* 2016;73:165-73.  
15  
16  
17 7 55. Yin TS, Said MM, Rahman RA, et al. An investigation of errors: The preparation and  
18  
19 8 administration of parenteral medications in an intensive care unit of a tertiary teaching  
20  
21 9 hospital in Malaysia. *Int J Pharm Pharm Sci* 2016;8:325-29.  
22  
23  
24 10 56. Terkola R, Czejka M, Bérubé J. Evaluation of real-time data obtained from gravimetric  
25  
26 11 preparation of antineoplastic agents shows medication errors with possible critical  
27  
28 12 therapeutic impact: Results of a large-scale, multicentre, multinational, retrospective  
29  
30 13 study. *J Clin Pharm Ther* 2017:doi: 10.1111/jcpt.12529. [Epub ahead of print].  
31  
32  
33  
34 14 57. van den Heever A, Scribante J, Perrie H, et al. Microbial contamination and labelling of  
35  
36 15 self-prepared, multi-dose phenylephrine solutions used at a teaching hospital. *Southern*  
37  
38 16 *African Journal of Anaesthesia and Analgesia* 2016;22:175-79.  
39  
40  
41 17 58. Rich DS, Fricker MP, Jr., Cohen MR, et al. Guidelines for the safe preparation of sterile  
42  
43 18 compounds: results of the ISMP Sterile Preparation Compounding Safety Summit of  
44  
45 19 October 2011. *Hosp Pharm* 2013;48:282-94.  
46  
47  
48  
49 20  
50  
51  
52  
53  
54  
55  
56  
57  
58  
59  
60

1  
2  
3 **FIGURE TITLES AND LEGENDS**  
4

5  
6 **Figure 1. Intravenous Medication Use Cycle**  
7

8  
9 **Figure 2. PRISMA study inclusion flow diagram**  
10

11  
12 IV, intravenous; PRISMA, Preferred Reporting Items for Systematic Reviews and Meta-  
13 Analysis.  
14  
15  
16  
17  
18  
19  
20  
21  
22  
23  
24  
25  
26  
27  
28  
29  
30  
31  
32  
33  
34  
35  
36  
37  
38  
39  
40  
41  
42  
43  
44  
45  
46  
47  
48  
49  
50  
51  
52  
53  
54  
55  
56  
57  
58  
59  
60

For peer review only

1  
2  
3  
4  
5  
6  
7  
8  
9  
10  
11  
12  
13  
14  
15  
16  
17  
18  
19  
20  
21  
22  
23  
24  
25  
26  
27  
28  
29  
30  
31  
32  
33  
34  
35  
36  
37  
38  
39  
40  
41  
42  
43  
44  
45  
46  
47  
48  
49  
50  
51  
52  
53  
54  
55  
56  
57  
58  
59  
60

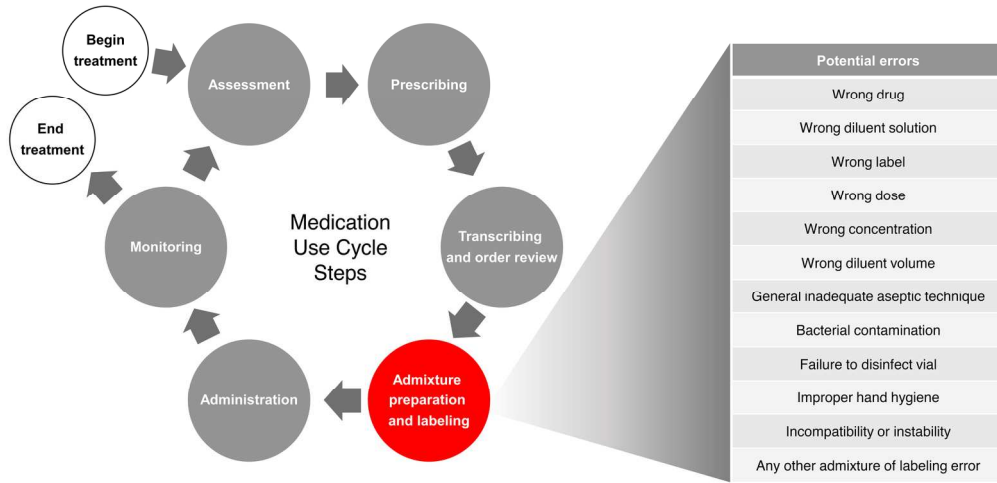

Figure 1. Intravenous medication use cycle

86x41mm (600 x 600 DPI)

For peer review only



Figure 2. PRISMA study inclusion flow diagram

110x96mm (600 x 600 DPI)

only

1  
2  
3  
4  
5  
6  
7  
8  
9  
10  
11  
12  
13  
14  
15  
16  
17  
18  
19  
20  
21  
22  
23  
24  
25  
26  
27  
28  
29  
30  
31  
32  
33  
34  
35  
36  
37  
38  
39  
40  
41  
42  
43  
44  
45  
46  
47  
48  
49

**ONLINE SUPPLEMENTARY TABLES**

**Table S1. Systematic Review Search Terms**

| <b>Errors</b>                                                                                                                | <b>Route of Administration</b>                                                        | <b>Compounding</b>                                                                                                                                                                                                                                                | <b>Article Type</b>                                                                                                                                                                                                                                                                                                                                  |
|------------------------------------------------------------------------------------------------------------------------------|---------------------------------------------------------------------------------------|-------------------------------------------------------------------------------------------------------------------------------------------------------------------------------------------------------------------------------------------------------------------|------------------------------------------------------------------------------------------------------------------------------------------------------------------------------------------------------------------------------------------------------------------------------------------------------------------------------------------------------|
| ([Medication* or drug* or pharmaceutical* or medical or infus*] adj5 error*).mp.                                             | parenteral<br>OR<br>intravenous                                                       | Compounding<br>OR<br>Compounded                                                                                                                                                                                                                                   | (clinical trial or randomized controlled trial or controlled clinical trial or multicenter study or phase 1 clinical trial or phase 2 clinical trial or phase 3 clinical trial or phase 4 clinical trial) (EMBASE limits)                                                                                                                            |
| OR<br>(Adverse adj5 [event* or reaction*]).mp.                                                                               | OR<br>catheter*<br>OR                                                                 | OR<br>Reconstitut*                                                                                                                                                                                                                                                | OR<br>(Evidence based medicine or consensus development or meta-analysis or outcomes research or "systematic review")                                                                                                                                                                                                                                |
| OR<br>([Medication* or drug* or pharmaceutical*] adj5 [contamina* or safety or incompatib*]).mp.                             | OR<br>infus*<br>OR<br>iv                                                              | Admix*<br>OR<br>(Prepar* adj5 (pharmacy or pharmacies or pharmacist or pharmaceutical* or drug* or medication* or ward or wards or nurs* or chemotherapy* or antineoplastic* or cytostatic* or nutrition* or mixture* or solution* or compound or compounds)).mp. | (EMBASE limits)<br>OR<br>(Clinical trial, all or clinical trial, phase I or clinical trial, phase II or clinical trial, phase III or clinical trial, phase IV or clinical trial or comparative study or controlled clinical trial or meta-analysis or multicenter study or observational study or randomized controlled trial or systematic reviews) |
| OR<br>(Overdos* or over dose*).mp.                                                                                           | OR<br>intraocular<br>OR<br>intravitreal<br>OR                                         | OR<br>wards or nurs* or chemotherapy* or antineoplastic* or cytostatic* or nutrition* or mixture* or solution* or compound or compounds)).mp.                                                                                                                     | (Medline limits)<br>OR                                                                                                                                                                                                                                                                                                                               |
| OR<br>Near miss.mp. OR<br>(incident or incidents or accident*).mp.                                                           | OR<br>intramuscular<br>OR<br>subcutaneous<br>OR                                       | OR<br>antineoplastic* or cytostatic* or nutrition* or mixture* or solution* or compound or compounds)).mp.                                                                                                                                                        | (Chart review* or observational or systematic or prospective or cohort or retrospective or controlled study or controlled studies or controlled trial* or cross sectional or evidence based or direct observation* or audit or audits or randomized or blind or blinded or case series).mp.                                                          |
| OR<br>(Steril* or unsteril* or septic or sepsis or aseptic or asepsis).mp.                                                   | OR<br>epidural<br>OR<br>intraosseous<br>OR                                            |                                                                                                                                                                                                                                                                   | (free text terms)                                                                                                                                                                                                                                                                                                                                    |
| OR<br>([Healthcare or health care or hospital or bloodstream or blood stream or cross] adj3 infection*).mp.                  | OR<br>intraperitoneal<br>OR<br>(ei or im or io or os or ip or iv or pa).fs. use emefd |                                                                                                                                                                                                                                                                   |                                                                                                                                                                                                                                                                                                                                                      |
| OR<br>patient safety.mp.                                                                                                     |                                                                                       |                                                                                                                                                                                                                                                                   |                                                                                                                                                                                                                                                                                                                                                      |
| OR<br>([Drug or medication* or pharmaceutical*] adj3 [stor*or stability or stable or instability or unstable or expir*]).mp. |                                                                                       |                                                                                                                                                                                                                                                                   |                                                                                                                                                                                                                                                                                                                                                      |
| OR<br>([Wrong* or incorrect* or inappropriate* or error* or                                                                  |                                                                                       |                                                                                                                                                                                                                                                                   |                                                                                                                                                                                                                                                                                                                                                      |

1  
2  
3  
4 inaccura\* or deviation\*]  
5 adj5 (dose\* or dosage\* or  
6 drug\* or medication\* or  
7 pharmaceutical\* or  
8 concentration\* or diluent\*  
9 or dilution\* or strength\* or  
10 calculat\* or volume or  
11 label\* or product\* or  
12 quantit\*).mp.  
13 OR  
14 (Missing label\* or "no  
15 label\*" or "not label\*).mp.  
16 OR  
17 particulate\*.mp.  
18  
19  
20  
21  
22  
23  
24  
25  
26  
27  
28  
29  
30  
31  
32  
33  
34  
35  
36  
37  
38  
39  
40  
41  
42  
43  
44  
45  
46  
47  
48  
49

For peer review only

Table S2. Details of Hawker Analysis

|                         | Abstract and Title | Introduction and Aims | Method and Data | Sampling | Data Analysis | Ethics and Bias | Results | Transferability or Generalizability | Implications and Usefulness | Average Score | Overall Quality |
|-------------------------|--------------------|-----------------------|-----------------|----------|---------------|-----------------|---------|-------------------------------------|-----------------------------|---------------|-----------------|
| Anselmi et al. 2007[1]  | 2                  | 2                     | 1               | 3        | 1             | 2               | 2       | 3                                   | 3                           | 2             | Fair            |
| Aruna et al. 2015[2]    | 2                  | 3                     | 3               | 3        | 2             | 3               | 3       | 3                                   | 4                           | 3             | Poor            |
| Bertsche et al. 2008[3] | 3                  | 3                     | 3               | 2        | 1             | 2               | 2       | 2                                   | 2                           | 2             | Fair            |
| Campino et al. 2016[4]  | 2                  | 1                     | 1               | 1        | 1             | 3               | 1       | 2                                   | 2                           | 2             | Fair            |
| Castagne et al. 2011[5] | 2                  | 1                     | 1               | 3        | 4             | 4               | 1       | 3                                   | 1                           | 2             | Fair            |
| Cousins et al. 2005[6]  | 1                  | 2                     | 1               | 3        | 3             | 2               | 2       | 3                                   | 2                           | 2             | Fair            |
| Crill et al. 2010[7]    | 1                  | 1                     | 1               | 2        | 1             | 1               | 2       | 1                                   | 2                           | 2             | Fair            |
| Dehmel et al. 2011[8]   | 1                  | 1                     | 2               | 3        | 1             | 1               | 2       | 3                                   | 2                           | 1             | Good            |
| Ding et al. 2015[9]     | 1                  | 2                     | 1               | 1        | 2             | 2               | 1       | 3                                   | 1                           | 2             | Fair            |
| Fahimi et al. 2007[10]  | 2                  | 2                     | 2               | 3        | 4             | 2               | 3       | 3                                   | 1                           | 2             | Fair            |
| Fahimi et al. 2008[11]  | 1                  | 1                     | 2               | 3        | 3             | 2               | 2       | 3                                   | 1                           | 2             | Fair            |
| Helder et al. 2016[12]  | 3                  | 2                     | 1               | 1        | 2             | 2               | 1       | 2                                   | 3                           | 2             | Fair            |
| Hoefel et al. 2006[13]  | 2                  | 2                     | 3               | 1        | 2             | 1               | 2       | 2                                   | 2                           | 2             | Fair            |

1  
2  
3  
4  
5  
6  
7  
8  
9  
10  
11  
12  
13  
14  
15  
16  
17  
18  
19  
20  
21  
22  
23  
24  
25  
26  
27  
28  
29  
30  
31  
32  
33  
34  
35  
36  
37  
38  
39  
40  
41  
42  
43  
44  
45  
46  
47  
48  
49

|                                    |   |   |   |   |   |   |   |   |   |   |   |      |
|------------------------------------|---|---|---|---|---|---|---|---|---|---|---|------|
| Khalili et al. 2013[14]            | 2 | 2 | 2 | 3 | 3 | 4 | 2 | 3 | 3 | 3 | 3 | Poor |
| Macias et al 2005[15]              | 2 | 1 | 1 | 1 | 1 | 2 | 1 | 1 | 3 | 1 | 1 | Good |
| MacKay et al. 2009[16]             | 2 | 2 | 3 | 4 | 4 | 4 | 3 | 3 | 2 | 3 | 3 | Poor |
| Masini et al. 2014[17]             | 2 | 2 | 3 | 2 | 1 | 4 | 2 | 2 | 3 | 2 | 2 | Fair |
| Moniz et al. 2014[18]              | 1 | 1 | 2 | 3 | 3 | 4 | 2 | 3 | 3 | 2 | 2 | Fair |
| Nguyen et al. 2014[19]             | 1 | 1 | 1 | 2 | 1 | 2 | 1 | 2 | 1 | 1 | 1 | Good |
| Niemann et al. 2015[20]            | 1 | 1 | 1 | 1 | 1 | 2 | 2 | 2 | 2 | 1 | 1 | Good |
| Ong et al. 2013[21]                | 2 | 2 | 2 | 3 | 1 | 4 | 2 | 3 | 2 | 2 | 2 | Fair |
| Parshuram et al. 2006[22]          | 2 | 2 | 1 | 1 | 1 | 2 | 1 | 2 | 2 | 1 | 1 | Good |
| Rashed et al. 2016[23]             | 1 | 2 | 2 | 3 | 2 | 3 | 1 | 3 | 2 | 2 | 2 | Fair |
| Reece et al. 2016[24]              | 1 | 1 | 1 | 2 | 3 | 3 | 1 | 2 | 2 | 2 | 2 | Fair |
| Rodriguez-Gonzalez et al. 2012[25] | 2 | 1 | 1 | 3 | 2 | 2 | 2 | 3 | 2 | 2 | 2 | Fair |
| Sacks et al. 2009[26]              | 1 | 1 | 1 | 3 | 3 | 1 | 2 | 3 | 2 | 2 | 2 | Fair |
| Seger et al. 2012[27]              | 1 | 2 | 1 | 3 | 1 | 1 | 1 | 3 | 2 | 2 | 2 | Fair |



1  
2  
3  
4  
5  
6  
7  
8  
9  
10  
11  
12  
13  
14  
15  
16  
17  
18  
19  
20  
21  
22  
23  
24  
25  
26  
27  
28  
29  
30  
31  
32  
33  
34  
35  
36  
37  
38  
39  
40  
41  
42  
43  
44  
45  
46  
47  
48  
49

|                                    |   |   |   |   |   |   |   |   |   |   |             |
|------------------------------------|---|---|---|---|---|---|---|---|---|---|-------------|
| Skouroliakou et al. 2005[28]       | 2 | 2 | 2 | 4 | 4 | 4 | 2 | 3 | 3 | 3 | <b>Poor</b> |
| Tavakoli-Ardakani et al. 2013[29]* | 2 | 3 | 2 | 3 | 2 | 3 | 0 | 3 | 2 | 2 | <b>Fair</b> |
| Terkola et al. 2017[30]            | 1 | 1 | 2 | 3 | 4 | 2 | 2 | 3 | 2 | 2 | <b>Fair</b> |
| van den Heever et al. 2016[31]     | 1 | 1 | 1 | 2 | 2 | 3 | 1 | 2 | 1 | 2 | <b>Fair</b> |
| Westbrook et al. 2011[32]          | 2 | 1 | 3 | 3 | 2 | 2 | 2 | 3 | 1 | 2 | <b>Fair</b> |
| Wheeler et al. 2008[33]            | 1 | 3 | 2 | 3 | 1 | 4 | 2 | 3 | 1 | 2 | <b>Fair</b> |
| Yin et al. 2016[34]                | 2 | 1 | 1 | 2 | 2 | 2 | 1 | 2 | 2 | 2 | <b>Fair</b> |

Studies are rated as good (1), fair (2), poor (3), or very poor (4) for each of the Hawker criteria, and given an overall score based on the average rating across all criteria.

\*This study could not be fully evaluated due to a missing table in the available publication.

Table S3. Study Characteristics

| Study                   | Geographical Location(s) | Centers, n | Patient Population                      | Study Design | Observational Technique                                                               | Type of Intravenous Admixture | Location of Intravenous Admixture Preparation | Method of Intravenous Admixture Preparation | Patient Impact Measured (Yes / No) |
|-------------------------|--------------------------|------------|-----------------------------------------|--------------|---------------------------------------------------------------------------------------|-------------------------------|-----------------------------------------------|---------------------------------------------|------------------------------------|
| Anselmi et al. 2007[1]  | Brazil                   | 3          | General inpatient units                 | Single arm   | Direct observation                                                                    | Multiple IV therapies         | Nursing ward                                  | Manual                                      | No                                 |
| Aruna et al. 2015[2]    | India                    | 1          | General inpatient units                 | Single arm   | Chart review                                                                          | Multiple IV therapies         | Not specified                                 | Manual                                      | No                                 |
| Bertsche et al. 2008[3] | Germany                  | 1          | General inpatient units and ICU         | Single arm   | Direct observation                                                                    | Multiple IV therapies         | Nursing ward                                  | Manual                                      | Yes                                |
| Campino et al. 2016[4]  | Spain                    | 11         | NICU                                    | Comparative  | Final concentration of admixture                                                      | Multiple IV therapies         | Central pharmacy vs nursing ward              | Manual                                      | No                                 |
| Castagne et al. 2011[5] | France                   | 1          | Oncology inpatients                     | Single arm   | Final concentration of admixture                                                      | Chemotherapy                  | Central pharmacy                              | Automated                                   | No                                 |
| Cousins et al. 2005[6]  | France<br>Germany<br>UK  | 3          | General medical and surgical inpatients | Single arm   | Direct observation (participants in France and Germany were blinded to study purpose) | Multiple IV therapies         | Nursing ward                                  | Manual                                      | No                                 |
| Crill et al. 2010[7]    | US                       | 1          | Critical care (NICU)                    | Single arm   | Bacterial culture                                                                     | Intravenous fat emulsion      | Central pharmacy                              | Manual                                      | Yes                                |
| Dehmel et al. 2011[8]   | Germany                  | 1          | Critical care (ICU)                     | Comparative  | Final concentration of admixture                                                      | Multiple IV therapies         | Central pharmacy vs nursing ward              | Automated vs manual                         | No                                 |
| Ding et al. 2015[9]     | China                    | 1          | General surgery inpatients              | Single arm   | Direct observation                                                                    | Multiple IV therapies         | Nursing ward                                  | Manual                                      | Yes                                |
| Fahimi et al. 2007[10]  | Iran                     | 1          | Critical care (ICU)                     | Single arm   | Direct observation                                                                    | Multiple IV therapies         | Nursing ward                                  | Manual                                      | Yes                                |
| Fahimi et al. 2008[11]  | Iran                     | 1          | Critical care (ICU)                     | Single arm   | Direct observation                                                                    | Multiple IV therapies         | Nursing ward                                  | Manual                                      | Yes                                |

1  
2  
3  
4  
5  
6  
7  
8  
9  
10  
11  
12  
13  
14  
15  
16  
17  
18  
19  
20  
21  
22  
23  
24  
25  
26  
27  
28  
29  
30  
31  
32  
33  
34  
35  
36  
37  
38  
39  
40  
41  
42  
43  
44  
45  
46  
47  
48  
49

|                           |             |   |                                                               |                |                                                                                                        |                       |                                   |                     |     |
|---------------------------|-------------|---|---------------------------------------------------------------|----------------|--------------------------------------------------------------------------------------------------------|-----------------------|-----------------------------------|---------------------|-----|
| Helder et al. 2016[12]    | Netherlands | 1 | NICU, PICU, and general pediatric wards                       | Interventional | Direct observation                                                                                     | Multiple IV therapies | Nursing ward                      | Manual              | No  |
| Hoefel et al. 2006[13]    | Brazil      | 1 | General units and ICU                                         | Single arm     | Direct observation                                                                                     | Antibiotic (cefepime) | Nursing ward                      | Manual              | No  |
| Khalili et al. 2013[14]   | Iran        | 3 | Adult and pediatric inpatients                                | Comparative    | Bacterial culture                                                                                      | Multiple IV therapies | Central pharmacy vs nursing ward  | Manual              | No  |
| Macias et al. 2005[15]    | Mexico      | 1 | Critical care (NICU)                                          | Single arm     | Bacterial culture                                                                                      | Multiple IV therapies | Nursing ward                      | Manual              | No  |
| MacKay et al. 2009[16]    | US          | 1 | Pediatric trauma unit                                         | Interventional | Cross-check                                                                                            | Multiple IV therapies | Central pharmacy                  | Automated           | No  |
| Masini et al. 2014[17]    | Italy       | 1 | Inpatient and outpatient oncology                             | Comparative    | Final concentration of admixture                                                                       | Chemotherapy          | Central pharmacy                  | Automated vs manual | No  |
| Moniz et al. 2014[18]     | US          | 1 | Pediatric inpatients                                          | Single arm     | Direct observation; Pharmacists reviewed digital photos of each preparation step via a web application | Multiple IV therapies | Central pharmacy                  | Automated           | Yes |
| Nguyen et al. 2014[19]    | Vietnam     | 1 | Critical care (ICU / PSU)                                     | Interventional | Direct observation (participants were blinded to study purpose)                                        | Multiple IV therapies | Not specified                     | Manual              | Yes |
| Niemann et al. 2015[20]   | Germany     | 1 | Pediatric inpatients                                          | Interventional | Direct observation                                                                                     | Multiple IV therapies | Not specified                     | Manual              | Yes |
| Ong et al. 2013[21]       | Malaysia    | 1 | General and acute care, adult and pediatric inpatients        | Single arm     | Direct observation                                                                                     | Multiple IV therapies | Nursing ward                      | Manual              | No  |
| Parshuram et al. 2006[22] | Canada      | 1 | Pediatric oncology (not specified if inpatient or outpatient) | Single arm     | Final concentration of admixture                                                                       | Chemotherapy          | Not specified                     | Not specified       | No  |
| Rashed et al. 2016[23]    | UK          | 1 | Pediatric inpatients                                          | Comparative    | Direct observation and final concentration of infusion                                                 | Morphine              | Nursing ward vs operating theater | Manual              | No  |

|    |                 |                |    |                     |                |                            |                  |                   |               |     |
|----|-----------------|----------------|----|---------------------|----------------|----------------------------|------------------|-------------------|---------------|-----|
| 1  |                 |                |    |                     |                |                            |                  |                   |               |     |
| 2  |                 |                |    |                     |                |                            |                  |                   |               |     |
| 3  |                 |                |    |                     |                |                            |                  |                   |               |     |
| 4  | Reece et al.    | US             | 1  | Oncology            | Comparative    | Error reports (self-       | Chemotherapy     | Central pharmacy  | Manual        | No  |
| 5  | 2016[24]        |                |    | outpatients         |                | reported and automated)    |                  |                   |               |     |
| 6  | Rodriguez-      | Spain          | 1  | Gastroenterology    | Single arm     | Direct observation         | Multiple IV      | Not specified     | Not specified | Yes |
| 7  | Gonzalez et al. |                |    | inpatients          |                | (participants were blinded | therapies        |                   |               |     |
| 8  | 2012[25]        |                |    |                     |                | to study purpose)          |                  |                   |               |     |
| 9  |                 |                |    |                     |                |                            |                  |                   |               |     |
| 10 | Sacks et al.    | US             | 1  | General adult and   | Single arm     | Incident reports           | Total parenteral | Central pharmacy  | Automated     | Yes |
| 11 | 2009[26]        |                |    | pediatric inpatient |                |                            | nutrition        |                   |               |     |
| 12 |                 |                |    | units and ICU       |                |                            |                  |                   |               |     |
| 13 | Seger et al.    | US             | 1  | Oncology inpatients | Comparative    | Direct observation         | Chemotherapy     | Central pharmacy  | Automated     | Yes |
| 14 | 2012[27]        |                |    |                     |                |                            |                  |                   | vs            |     |
| 15 |                 |                |    |                     |                |                            |                  |                   | manual        |     |
| 16 | Skouroliakou    | Greece         | 1  | Neonatal inpatients | Comparative    | Cross-check and direct     | Total parenteral | Not specified     | Automated     | No  |
| 17 | et al. 2005[28] |                |    |                     |                | observation                | nutrition        |                   | vs            |     |
| 18 |                 |                |    |                     |                |                            |                  |                   | manual        |     |
| 19 | Tavakoli-       | Iran           | 1  | Hematology and      | Single arm     | Direct observation         | Chemotherapy     | Nursing ward      | Manual        | No  |
| 20 | Ardakani et al. |                |    | oncology inpatients |                |                            |                  |                   |               |     |
| 21 | 2013[29]        |                |    | and outpatients     |                |                            |                  |                   |               |     |
| 22 |                 |                |    |                     |                |                            |                  |                   |               |     |
| 23 | Terkola et al.  | Austria        | 10 | Oncology            | Single arm     | Incident reports           | Chemotherapy     | Offsite pharmacy  | Not specified | No  |
| 24 | 2017[30]        | Czech Republic |    |                     |                |                            |                  |                   |               |     |
| 25 |                 | Denmark        |    |                     |                |                            |                  |                   |               |     |
| 26 |                 | Germany        |    |                     |                |                            |                  |                   |               |     |
| 27 |                 | Switzerland    |    |                     |                |                            |                  |                   |               |     |
| 28 | van den         | South Africa   | 1  | Obstetric surgery   | Single arm     | Bacterial culture          | Phenylephrine    | Obstetric theater | Manual        | No  |
| 29 | Heever et al.   |                |    |                     |                |                            |                  |                   |               |     |
| 30 | 2016[31]        |                |    |                     |                |                            |                  |                   |               |     |
| 31 |                 |                |    |                     |                |                            |                  |                   |               | Yes |
| 32 | Westbrook et    | Australia      | 2  | General and         | Single arm     | Direct observation         | Multiple IV      | Nursing ward      | Manual        |     |
| 33 | al. 2011[32]    |                |    | surgical inpatients |                |                            | therapies        |                   |               |     |
| 34 |                 |                |    |                     |                |                            |                  |                   |               |     |
| 35 | Wheeler et al.  | UK             | 1  | Critical care       | Interventional | Cross-check                | Multiple IV      | Nursing ward      | Manual        | No  |
| 36 | 2008[33]        |                |    | (neurological)      |                |                            | therapies        |                   |               |     |
| 37 |                 |                |    | inpatients          |                |                            |                  |                   |               |     |
| 38 | Yin et al.      | Malaysia       | 1  | Critical care (ICU) | Single arm     | Direct observation         | Multiple IV      | Nursing ward      | Manual        | No  |
| 39 | 2016[34]        |                |    |                     |                |                            | therapies        |                   |               |     |
| 40 |                 |                |    |                     |                |                            |                  |                   |               |     |

Method of preparation was assumed to be manual for studies in which IV admixture preparation occurred in the nursing ward, and no other information regarding method of preparation was provided. ICU, intensive care unit; IV, intravenous; NICU, neonatal intensive care unit; PSU, post-surgical unit; UK, United Kingdom; US, United States.

**Table S4. Patient Burden of Harm**

| Study                                                             | Error Types                                                                                     | Burden of Harm                                                                                                                                                                                                                                                                                                                                                                                                                                                                     |
|-------------------------------------------------------------------|-------------------------------------------------------------------------------------------------|------------------------------------------------------------------------------------------------------------------------------------------------------------------------------------------------------------------------------------------------------------------------------------------------------------------------------------------------------------------------------------------------------------------------------------------------------------------------------------|
| NCC MERP Medication Error Index Definition of Error Severity      |                                                                                                 |                                                                                                                                                                                                                                                                                                                                                                                                                                                                                    |
| <b>Fahimi et al. 2007[10]</b>                                     | Wrong drug<br>Wrong label<br>Wrong dose                                                         | All observed errors were rated NCC MERP Index Category B ("An error occurred but the error did not reach the patient.")                                                                                                                                                                                                                                                                                                                                                            |
| <b>Rodriguez-Gonzalez et al. 2012[25]</b>                         | Wrong diluent solution<br>Wrong diluent volume                                                  | <ul style="list-style-type: none"> <li>Severity was defined according to updated medication errors taxonomy adapted from NCC MERP definitions.[35]</li> <li>Severity of wrong preparation errors (reconstitution and dilution) were determined to have the potential to cause "no damage."</li> </ul>                                                                                                                                                                              |
| <b>Sacks et al. 2009[26]</b>                                      | Composite                                                                                       | <p>Severity of errors was defined according to the NCC MERP Index:</p> <ul style="list-style-type: none"> <li>91% of errors did not cause harm (Categories B–D)</li> <li>15% of errors were "near misses" (Categories A–B)</li> <li>8% of errors contributed to or resulted in temporary harm (Categories E–F)</li> </ul> <p>No errors resulted in permanent harm, near death, or death (Categories G–I)</p>                                                                       |
| Clinician Assessment or Expert Panel Definition of Error Severity |                                                                                                 |                                                                                                                                                                                                                                                                                                                                                                                                                                                                                    |
| <b>Bertsche et al. 2008[3]</b>                                    | Inadequate aseptic technique                                                                    | <ul style="list-style-type: none"> <li>A multidisciplinary committee for quality assurance established risk scores for medical errors.</li> <li>Errors were assigned a risk score weighted by potential risk of the drug involved and the characteristics of the error (low risk = 0.5, moderate risk = 1, high risk = 2).</li> <li>Rates of error by severity were reported for all types of administration combined (IV, oral, and gastric tube), but not separately.</li> </ul> |
| <b>Moniz et al. 2014[18]</b>                                      | Wrong dose<br>Wrong drug<br>Wrong diluent solution<br>Inadequate aseptic technique<br>Composite | <p>A new workflow was implemented that detected IV preparation errors that would not have been detected previously. These new errors (n = 447) were rated:</p> <ul style="list-style-type: none"> <li>Little potential for harm: 62.64%</li> <li>Potential ADE with moderate harm: 32.66%</li> <li>Potential ADE with severe harm: 4.70%</li> </ul>                                                                                                                                |
| <b>Nguyen et al. 2014[19]</b>                                     | Wrong drug                                                                                      | <p>Clinical relevance of each dose with <math>\geq 1</math> error was rated on a validated scale ranging from 0 (no harm) to 10 (death) by a panel of healthcare providers, and was categorized as follows:</p> <ul style="list-style-type: none"> <li>Minor outcome: 0–2</li> </ul>                                                                                                                                                                                               |

**Table S4. Patient Burden of Harm**

| Study                                            | Error Types                  | Burden of Harm                                                                                                                                                                                                                                                                                                                                                                           |
|--------------------------------------------------|------------------------------|------------------------------------------------------------------------------------------------------------------------------------------------------------------------------------------------------------------------------------------------------------------------------------------------------------------------------------------------------------------------------------------|
|                                                  | Wrong dose                   | <ul style="list-style-type: none"> <li>Moderate outcome: 3–7</li> <li>Severe outcome: 8–10</li> </ul>                                                                                                                                                                                                                                                                                    |
|                                                  | Composite                    | Moderate and severe outcomes were considered clinically relevant (57.9% to 64.0% of errors across the 2 study wards).                                                                                                                                                                                                                                                                    |
| <b>Niemann et al. 2014[20]</b>                   | Wrong diluent solution       | Clinical relevance of error subcategories was rated by an expert panel on a four-point scale:                                                                                                                                                                                                                                                                                            |
|                                                  |                              | 1. No clinical relevance                                                                                                                                                                                                                                                                                                                                                                 |
|                                                  |                              | 2. Minor clinical relevance                                                                                                                                                                                                                                                                                                                                                              |
|                                                  | Wrong diluent volume         | 3. Clinical relevance                                                                                                                                                                                                                                                                                                                                                                    |
|                                                  |                              | 4. High clinical relevance                                                                                                                                                                                                                                                                                                                                                               |
|                                                  | Composite                    | The frequency of each level of severity combined oral and IV drug errors.                                                                                                                                                                                                                                                                                                                |
| <b>Seger et al. 2012[27]</b>                     | Wrong drug                   | <ul style="list-style-type: none"> <li>Severity was rated as life-threatening, severe, significant, or little-to-no harm.</li> <li>Events with potential for little-to-no harm were not included in the analysis.</li> <li>There were no potentially life-threatening events, and the remaining events were approximately evenly distributed between significant and serious.</li> </ul> |
|                                                  | Wrong concentration          | Doses with $\pm 5\%$ to 10% variance were considered to have little to no potential for harm. Those with variance $> \pm 10\%$ were rated serious and potentially harmful.                                                                                                                                                                                                               |
| <b>Westbrook et al. 2011[32]</b>                 | Wrong drug                   | <ul style="list-style-type: none"> <li>Severity was rated on a scale from 1 ("Incident is likely to have little to no effect on the patient") to 5 ("Incident is likely to lead to death"), with ratings of 1 to 2 considered minor errors and 3 to 5 considered serious errors.</li> <li>25.5% of overall errors were rated as serious.</li> </ul>                                      |
|                                                  | Wrong diluent solution       | • 23.8% of wrong diluent solution errors were rated as serious.                                                                                                                                                                                                                                                                                                                          |
|                                                  | Wrong diluent volume         | • 17.4% of wrong diluent volume errors were rated as serious.                                                                                                                                                                                                                                                                                                                            |
| Other Method for Determination of Error Severity |                              |                                                                                                                                                                                                                                                                                                                                                                                          |
| <b>Crill et al. 2010[7]</b>                      | Inadequate aseptic technique | <ul style="list-style-type: none"> <li>Severity of errors was not rated.</li> <li>Authors noted that no cases of systemic infection arose from syringes that had positive cultures.</li> </ul>                                                                                                                                                                                           |
|                                                  | Bacterial contamination      |                                                                                                                                                                                                                                                                                                                                                                                          |
| <b>Ding et al. 2015[9]</b>                       | Wrong dose                   | <ul style="list-style-type: none"> <li>An error was considered clinically important if it concerned a drug listed in the ISMP list of high-alert medications (2008).</li> <li>81% of TPN dose errors involved ISMP high-alert medications.</li> </ul>                                                                                                                                    |

1  
2  
3  
4  
5  
6  
7  
8  
9  
10  
11  
12  
13  
14  
15  
16  
17  
18  
19  
20  
21  
22  
23  
24  
25  
26  
27  
28  
29  
30  
31  
32  
33  
34  
35  
36  
37  
38  
39  
40  
41  
42  
43  
44  
45  
46  
47  
48  
49

**Table S4. Patient Burden of Harm**

| Study                         | Error Types            | Burden of Harm                                                                                                                                       |
|-------------------------------|------------------------|------------------------------------------------------------------------------------------------------------------------------------------------------|
|                               | Composite              | An error was considered clinically important if it concerned a drug listed in the ISMP list of high-alert medications (2008).                        |
| <b>Fahimi et al. 2008[11]</b> | Wrong diluent solution | There was no severity rating system, but the authors note that none of the errors identified resulted in adverse effects or major risks to patients. |
|                               | Wrong dose             |                                                                                                                                                      |

ADE, adverse drug event; ISMP, Institute for Safe Medication Practices; IV, intravenous; NCC MERP, National Coordinating Council for Medication Error Reporting and Prevention; TPN, total parenteral nutrition.

**Table S5. Error Incidence Definitions**

| Admixture Preparation and Labeling Error Types | Definitions                                                                                                                                                                                                                                                                             | Study                                                                                                                                                                                |
|------------------------------------------------|-----------------------------------------------------------------------------------------------------------------------------------------------------------------------------------------------------------------------------------------------------------------------------------------|--------------------------------------------------------------------------------------------------------------------------------------------------------------------------------------|
| <b>Component Error</b>                         |                                                                                                                                                                                                                                                                                         |                                                                                                                                                                                      |
| Wrong Drug                                     | An IV drug was prepared or administered that differed from the one that was prescribed                                                                                                                                                                                                  | Anselmi et al. 2007[1] Cousins et al. 2005[6] Moniz et al. 2014[18] Nguyen et al. 2014[19] Ong et al. 2013[21] Reece et al. 2016[24] Seger et al. 2012[27] Westbrook et al. 2011[32] |
|                                                | An unauthorized IV drug was administered, or an order was changed, that was not found in the patient chart                                                                                                                                                                              | Fahimi et al. 2007[10]                                                                                                                                                               |
|                                                | An incorrect drug or dosage form was selected                                                                                                                                                                                                                                           | Yin et al. 2016[34]                                                                                                                                                                  |
| Wrong Diluent Solution                         | An IV drug was prepared or administered with a diluent that was not compatible with drug and volume to achieve the correct concentration                                                                                                                                                | Cousins et al. 2005[6]                                                                                                                                                               |
|                                                | An IV drug was prepared with the incorrect diluent based on any of the following: <ul style="list-style-type: none"> <li>• The manufacturer's instructions</li> <li>• Published drug preparation handbooks</li> <li>• Other internal or external drug preparation guidelines</li> </ul> | Fahimi et al. 2008[11] Niemann et al. 2015[20] Ong et al. 2013[21] Westbrook et al. 2011[32]                                                                                         |
|                                                | An IV drug was prepared with the incorrect diluent                                                                                                                                                                                                                                      | Moniz et al. 2014[18] Rashed et al. 2016[23] Reece et al. 2016[24]                                                                                                                   |
|                                                | The IV medication was reconstituted or diluted incorrectly according to medication errors taxonomy adapted from NCC MERP definitions [Otero Lopez 2008]                                                                                                                                 | Rodriguez-Gonzalez et al. 2012[25]                                                                                                                                                   |
| Wrong label                                    | An IV drug was prepared or administered with a missing or incomplete label with respect to drug name, dose, patient name, or preparation time                                                                                                                                           | Cousins et al. 2005[6]                                                                                                                                                               |
|                                                | The administration rate, patient identification, date, or time of infusion was not properly documented                                                                                                                                                                                  | Fahimi et al. 2007[10]                                                                                                                                                               |
|                                                | The IV drug label was incomplete with respect to patient, drug, dose, or preparation time, or the opened diluent vials were improperly labeled                                                                                                                                          | Ong et al. 2013[21]                                                                                                                                                                  |



|                                                                                                                                                                             |                                                                                                                                                                           |                                                                                                                                                        |
|-----------------------------------------------------------------------------------------------------------------------------------------------------------------------------|---------------------------------------------------------------------------------------------------------------------------------------------------------------------------|--------------------------------------------------------------------------------------------------------------------------------------------------------|
|                                                                                                                                                                             | Syringes or drug infusion containers were not labeled properly                                                                                                            | Yin et al. 2016[34]                                                                                                                                    |
|                                                                                                                                                                             | Label was incomplete or incorrect with regard to name of solution, concentration of solution, date of preparation, time or preparation, or healthcare worker's signature  | van den Heever et al. 2016[31]                                                                                                                         |
|                                                                                                                                                                             | The syringe label was illegible or missing the drug name, dose, concentration, diluent, patient name, patient location, preparer's initials, countersigned, date, or time | Wheeler et al. 2008[33]                                                                                                                                |
| <b>Dose or Calculation Error</b>                                                                                                                                            |                                                                                                                                                                           |                                                                                                                                                        |
| Wrong Dose                                                                                                                                                                  | An incorrect IV drug dose or infusion volume was prepared or administered                                                                                                 | Anselmi et al. 2007[1]<br>Cousins et al. 2005[6]<br>Fahimi et al. 2007[10]<br>Hoefel et al. 2006[13]<br>Moniz et al. 2014[18]<br>Reece et al. 2016[24] |
|                                                                                                                                                                             | The calculated concentration deviated by >10% of that prescribed                                                                                                          | Campino et al. 2016[4]                                                                                                                                 |
|                                                                                                                                                                             | An ingredient deviated > ±10% from the correct volume or concentration, a dose was omitted, or an extra dose was given                                                    | Ding et al. 2015[9]                                                                                                                                    |
|                                                                                                                                                                             | An IV drug that differed by ±10% of the prescribed dose was prepared                                                                                                      | Nguyen et al. 2014[19]                                                                                                                                 |
|                                                                                                                                                                             | An incorrect dose or diluent volume was calculated that differed from the manufacturer's instructions or published drug preparation handbooks                             | Fahimi et al. 2008[11]                                                                                                                                 |
| Wrong Concentration                                                                                                                                                         | The sampled IV drug preparation deviated by ±20% or more from its intended concentration                                                                                  | Castagne et al. 2011[5]                                                                                                                                |
|                                                                                                                                                                             | The sampled IV drug preparation deviated by ≥ ±5% or ≥ ±10% from its intended concentration                                                                               | Dehmel et al. 2011[8]<br>Masini et al. 2014[17]                                                                                                        |
|                                                                                                                                                                             | The sampled IV drug preparation deviated by ±10% or more from its intended concentration                                                                                  | Parshuram et al. 2006[22]                                                                                                                              |
|                                                                                                                                                                             | The sampled IV drug preparation deviated by more than ±10% from its intended concentration                                                                                | Campino et al. 2016[4]<br>Yin et al. 2016[34]                                                                                                          |
|                                                                                                                                                                             | The morphine infusion deviated from its target concentration beyond the pharmacopoeial limit for drug content of morphine sulphate injection (92.5–107.5%)                | Rashed et al. 2016[23]                                                                                                                                 |
|                                                                                                                                                                             | The sampled IV drug preparation deviated by ±5% or more from its intended concentration                                                                                   | Seger et al. 2012[27]                                                                                                                                  |
|                                                                                                                                                                             | The concentration of any of the individual components of total parenteral nutrition was calculated incorrectly                                                            | Skouroliakou et al. 2005[28]                                                                                                                           |
| The volume of the sampled IV drug preparation exceeded the gravimetric software's preset tolerance limit<br>• Tolerance levels were set by each site and ranged from 2.5–6% | Terkola et al. 2017[30]                                                                                                                                                   |                                                                                                                                                        |

|                              |                                                                                                                                                                                                                                                                                                                                                                 |                                                                                                   |
|------------------------------|-----------------------------------------------------------------------------------------------------------------------------------------------------------------------------------------------------------------------------------------------------------------------------------------------------------------------------------------------------------------|---------------------------------------------------------------------------------------------------|
|                              | An incorrect diluent volume was used                                                                                                                                                                                                                                                                                                                            | Cousins et al. 2005[6]<br>Hoefel et al. 2006[13]<br>Reece et al. 2016[24]                         |
| Wrong Diluent Volume         | An IV drug was prepared with an incorrect diluent volume based on any of the following: <ul style="list-style-type: none"> <li>• The manufacturer's instructions</li> <li>• The corresponding summaries of product characteristics</li> <li>• Published drug preparation handbooks</li> <li>• Other internal or external drug preparation guidelines</li> </ul> | Niemann et al. 2015[20]<br>Ong et al. 2013[21]<br>Westbrook et al. 2011[32]                       |
|                              | The IV medication was reconstituted or diluted incorrectly according to medication errors taxonomy adapted from NCC MERP definitions [Otero Lopez 2008]                                                                                                                                                                                                         | Rodriguez-Gonzalez et al. 2012[25]                                                                |
|                              | The total volume of the IV solution was incorrect                                                                                                                                                                                                                                                                                                               | Skouroliakou et al. 2005[28]                                                                      |
|                              | <b>Aseptic Technique Error</b>                                                                                                                                                                                                                                                                                                                                  |                                                                                                   |
| Inadequate Aseptic Technique | The IV drug was not prepared in accordance with local hygiene guidelines                                                                                                                                                                                                                                                                                        | Bertsche et al. 2008[3]                                                                           |
|                              | Sampling of repackaged syringes resulted in positive bacterial cultures                                                                                                                                                                                                                                                                                         | Crill et al. 2010[7]                                                                              |
|                              | Nonadherence to 1 or more of the following hygiene protocols: <ul style="list-style-type: none"> <li>• Hand disinfection by applying hand alcohol</li> <li>• Rubbing hands for 30 seconds</li> <li>• Using sterile gloves</li> <li>• Disinfecting the ampoule</li> <li>• Allowing the ampoule to dry for 30 seconds</li> </ul>                                  | Helder et al. 2016[12]                                                                            |
|                              | Aseptic technique was not followed during IV infusion preparation                                                                                                                                                                                                                                                                                               | Rashed et al. 2016[23]<br>Yin et al. 2016[34]                                                     |
|                              | Needles or syringes were left uncapped during IV preparation                                                                                                                                                                                                                                                                                                    | Moniz et al. 2014[18]                                                                             |
|                              | Bacterial Contamination                                                                                                                                                                                                                                                                                                                                         | Sampling of IV drug preparations resulted in positive bacterial cultures                          |
| Failure to Disinfect Vial    | Vial top or ampoule was not disinfected during preparation                                                                                                                                                                                                                                                                                                      | Cousins et al. 2005[6]<br>Helder et al. 2016[12]<br>Ong et al. 2013[21]<br>Rashed et al. 2016[23] |

1  
2  
3  
4  
5  
6  
7  
8  
9  
10  
11  
12  
13  
14  
15  
16  
17  
18  
19  
20  
21  
22  
23  
24  
25  
26  
27  
28  
29  
30  
31  
32  
33  
34  
35  
36  
37  
38  
39  
40  
41  
42  
43  
44  
45  
46  
47  
48  
49

|                                 |                                                                                                                                                                                                                                                                                                                                                            |                                               |
|---------------------------------|------------------------------------------------------------------------------------------------------------------------------------------------------------------------------------------------------------------------------------------------------------------------------------------------------------------------------------------------------------|-----------------------------------------------|
| Improper Hand Hygiene           | Hands were not washed, gloves were not worn, or nonsterile gloves were worn during IV drug preparation                                                                                                                                                                                                                                                     | Cousins et al. 2005[6]<br>Ong et al. 2013[21] |
|                                 | Gloves were not worn during IV infusion preparation                                                                                                                                                                                                                                                                                                        | Rashed et al. 2016[23]                        |
| <b>Composite Error</b>          |                                                                                                                                                                                                                                                                                                                                                            |                                               |
| Any Admixture or Labeling Error | An IV drug dose was prepared or administered differently from how it was prescribed by the physician in the patient's medical record with regard to:<br><ul style="list-style-type: none"> <li>• Wrong patient</li> <li>• Wrong drug</li> <li>• Wrong dose</li> <li>• Omitted dose</li> </ul>                                                              | Anselmi et al. 2007[1]                        |
|                                 | An IV drug was incorrectly formulated or manipulated before administration:<br><ul style="list-style-type: none"> <li>• Incorrect reconstitution or dilution</li> <li>• Physicochemical incompatibility of drugs mixed in the same container</li> <li>• Wrong pharmaceutical form</li> </ul>                                                               | Aruna et al. 2015[2]                          |
|                                 | Any of the following IV preparation or administration errors occurred:<br><ul style="list-style-type: none"> <li>• Unordered drug</li> <li>• Omitted drug</li> <li>• Wrong dose</li> <li>• Extra dose</li> <li>• Wrong route of administration</li> </ul>                                                                                                  | Ding et al. 2015[9]                           |
|                                 | A drip compounding error of greater than 1 standard deviation from the calculated value for each component in parenteral nutrition preparations occurred                                                                                                                                                                                                   | MacKay et al. 2009[16]                        |
|                                 | IV drug preparations in the institution were prepared and verified using an IV workflow manager system. Doses that were reworked or rejected were retrospectively reviewed for errors in:<br><ul style="list-style-type: none"> <li>• Preparation</li> <li>• Aseptic technique</li> <li>• Documentation</li> </ul>                                         | Moniz et al. 2014[18]                         |
|                                 | Any IV of the following IV preparation or administration errors occurred:<br><ul style="list-style-type: none"> <li>• Wrong drug</li> <li>• Wrong dose</li> <li>• Wrong dosage form</li> <li>• Deteriorated drug</li> <li>• Wrong preparation technique</li> <li>• Omission</li> <li>• Unordered drug</li> <li>• Wrong administration technique</li> </ul> | Nguyen et al. 2014[19]                        |
|                                 | At least 1 deviation from internal or external drug preparation or administration guidelines, corresponding summaries of product characteristics, or manufacturer recommendations occurred during the drug handling processes (eg, preparation, storage, labeling)                                                                                         | Niemann et al. 2015[20]                       |

|                                                                                                        |                                                                                                                                                                                                                                                                                                                                                                                                                               |                                   |
|--------------------------------------------------------------------------------------------------------|-------------------------------------------------------------------------------------------------------------------------------------------------------------------------------------------------------------------------------------------------------------------------------------------------------------------------------------------------------------------------------------------------------------------------------|-----------------------------------|
|                                                                                                        | <p>Documented events in parenteral nutrition preparation or administration:</p> <ul style="list-style-type: none"> <li>• Dose omission</li> <li>• Extra dose</li> <li>• Prescription or refill delayed</li> <li>• Drug list incorrect</li> <li>• Monitoring error</li> <li>• Unauthorized drug</li> <li>• Inadequate pain management</li> <li>• Wrong events (eg, dose, drug, time, patient)</li> </ul>                       | Sacks et al. 2009[26]             |
|                                                                                                        | A drug was prepared using the incorrect diluent or incorrect volume, or was not mixed properly                                                                                                                                                                                                                                                                                                                                | Yin et al. 2016[34]               |
|                                                                                                        | <p>A deviation in handling, preparation, or administration of an IV drug occurred based on:</p> <ul style="list-style-type: none"> <li>• The manufacturer's instructions</li> <li>• <i>Handbook on Injectable Drugs</i>, 15th ed.</li> <li>• <i>Drug Information Handbook</i>, 19th ed.</li> <li>• American Society of Health-System Pharmacists Drug Information</li> <li>• <i>Oncology Nursing Drug Handbook</i></li> </ul> | Tavakoli-Ardakani et al. 2013[29] |
| IV, intravenous; NCC MERP, National Coordinating Council for Medication Error Reporting and Prevention |                                                                                                                                                                                                                                                                                                                                                                                                                               |                                   |

## References

1. Anselmi ML, Peduzzi M, Dos Santos CB. Errors in the administration of intravenous medication in Brazilian hospitals. *J Clin Nurs* 2007;16:1839-47.
2. Aruna C, Nagaraju A, Swathi K, et al. Errors in the intravenous drug administration in general medicine department of tertiary care teaching hospital. *Journal of Global Trends in Pharmaceutical Sciences* 2015;6:2628-34.
3. Bertsche T, Niemann D, Mayer Y, et al. Prioritising the prevention of medication handling errors. *Pharm World Sci* 2008;30:907-15.
4. Campino A, Arranz C, Unceta M, et al. Medicine preparation errors in ten Spanish neonatal intensive care units. *Eur J Pediatr* 2016;175:203-10.
5. Castagne V, Habert H, Abbara C, et al. Cytotoxics compounded sterile preparation control by HPLC during a 16-month assessment in a French university hospital: importance of the mixing bags step. *J Oncol Pharm Pract* 2011;17:191-6.
6. Cousins DH, Sabatier B, Begue D, et al. Medication errors in intravenous drug preparation and administration: a multicentre audit in the UK, Germany and France. *Qual Saf Health Care* 2005;14:190-5.
7. Crill CM, Hak EB, Robinson LA, et al. Evaluation of microbial contamination associated with different preparation methods for neonatal intravenous fat emulsion infusion. *Am J Health Syst Pharm* 2010;67:914-8.
8. Dehmel C, Braune SA, Kreyman G, et al. Do centrally pre-prepared solutions achieve more reliable drug concentrations than solutions prepared on the ward? *Intensive Care Med* 2011;37:1311-6.
9. Ding Q, Barker K, Flynn E, et al. Incidence of intravenous medication errors in a chinese hospital. *Val Health Reg Issues* 2015;6C:33-39.

- 1  
2  
3 10. Fahimi F, Sistanizad M, Abrishami R, et al. An observational study of errors related to the  
4 preparation and administration of medications given by infusion devices in a teaching hospital. .  
5  
6 *Iran J Pharm Res* 2007;6:295-99.  
7  
8
- 9  
10 11. Fahimi F, Ariapanah P, Faizi M, et al. Errors in preparation and administration of intravenous  
11 medications in the intensive care unit of a teaching hospital: an observational study. *Aust Crit*  
12 *Care* 2008;21:110-6.  
13  
14
- 15  
16 12. Helder OK, Kornelisse RF, Reiss IK, et al. Disinfection practices in intravenous drug  
17 administration. *Am J Infect Control* 2016;44:721-3.  
18  
19
- 20  
21 13. Hoefel HH, Lautert L. Errors committed by nursing technicians and assistants in administering  
22 antibiotics. *Am J Infect Control* 2006;34:437-42.  
23  
24
- 25  
26 14. Khalili H, Sheikhabayi M, Samadi N, et al. Bacterial contamination of single- and multiple-dose  
27 vials after multiple use and intravenous admixtures in three different hospitals in Iran. *Iran J*  
28 *Pharm Res* 2013;12:205-09.  
29  
30
- 31  
32 15. Macias AE, Munoz JM, Galvan A, et al. Nosocomial bacteremia in neonates related to poor  
33 standards of care. *Pediatr Infect Dis J* 2005;24:713-6.  
34  
35
- 36  
37 16. Mackay MW, Cash J, Farr F, et al. Improving Pediatric Outcomes through Intravenous and Oral  
38 Medication Standardization. *J Pediatr Pharmacol Ther* 2009;14:226-35.  
39  
40
- 41  
42 17. Masini C, Nanni O, Antaridi S, et al. Automated preparation of chemotherapy: quality  
43 improvement and economic sustainability. *Am J Health Syst Pharm* 2014;71:579-85.  
44  
45
- 46  
47 18. Moniz TT, Chu S, Tom C, et al. Sterile product compounding using an i.v. compounding  
48 workflow management system at a pediatric hospital. *Am J Health Syst Pharm* 2014;71:1311-7.  
49  
50
- 51  
52 19. Nguyen HT, Pham HT, Vo DK, et al. The effect of a clinical pharmacist-led training programme  
53 on intravenous medication errors: a controlled before and after study. *BMJ Qual Saf* 2014;23:319-  
54 24.  
55  
56
- 57  
58 20. Niemann D, Bertsche A, Meyrath D, et al. A prospective three-step intervention study to prevent  
59 medication errors in drug handling in paediatric care. *J Clin Nurs* 2015;24:101-14.  
60

- 1  
2  
3 21. Ong WM, Subasyini S. Medication errors in intravenous drug preparation and administration.  
4  
5 *Med J Malaysia* 2013;68:52-7.  
6  
7  
8 22. Parshuram CS, Dupuis LL, To T, et al. Occurrence and impact of unanticipated variation in  
9  
10 intravenous methotrexate dosing. *Ann Pharmacother* 2006;40:805-11.  
11  
12 23. Rashed AN, Tomlin S, Aguado V, et al. Sources and magnitude of error in preparing morphine  
13  
14 infusions for nurse-patient controlled analgesia in a UK paediatric hospital. *Int J Clin Pharm*  
15  
16 2016;38:1069-74.  
17  
18 24. Reece KM, Lozano MA, Roux R, et al. Implementation and evaluation of a gravimetric i.v.  
19  
20 workflow software system in an oncology ambulatory care pharmacy. *Am J Health Syst Pharm*  
21  
22 2016;73:165-73.  
23  
24 25. Rodriguez-Gonzalez CG, Herranz-Alonso A, Martin-Barbero ML, et al. Prevalence of medication  
25  
26 administration errors in two medical units with automated prescription and dispensing. *J Am Med*  
27  
28 *Inform Assoc* 2012;19:72-8.  
29  
30 26. Sacks GS, Rough S, Kudsk KA. Frequency and severity of harm of medication errors related to  
31  
32 the parenteral nutrition process in a large university teaching hospital. *Pharmacotherapy*  
33  
34 2009;29:966-74.  
35  
36 27. Seger AC, Churchill WW, Keohane CA, et al. Impact of robotic antineoplastic preparation on  
37  
38 safety, workflow, and costs. *J Oncol Pract* 2012;8:344-49.  
39  
40 28. Skouroliakou M, Konstantinou D, Papasarantopoulos P, et al. Computer assisted total parenteral  
41  
42 nutrition for pre-term and sick term neonates. *Pharm World Sci* 2005;27:305-10.  
43  
44 29. Tavakoli-Ardakani M, Omidi S, Eshraghi A, et al. Medication errors in administration of  
45  
46 chemotherapeutic agents: an observational study. *Iran J Pharm Sci* 2013;9:1-11.  
47  
48 30. Terkola R, Czejka M, Bérubé J. Evaluation of real-time data obtained from gravimetric  
49  
50 preparation of antineoplastic agents shows medication errors with possible critical therapeutic  
51  
52 impact: Results of a large-scale, multicentre, multinational, retrospective study. *J Clin Pharm*  
53  
54 *Ther* 2017:doi: 10.1111/jcpt.12529. [Epub ahead of print].  
55  
56  
57  
58  
59  
60

- 1  
2  
3  
4  
5  
6  
7  
8  
9  
10  
11  
12  
13  
14  
15  
16  
17  
18  
19  
20  
21  
22  
23  
24  
25  
26  
27  
28  
29  
30  
31  
32  
33  
34  
35  
36  
37  
38  
39  
40  
41  
42  
43  
44  
45  
46  
47  
48  
49  
50  
51  
52  
53  
54  
55  
56  
57  
58  
59  
60
31. van den Heever A, Scribante J, Perrie H, et al. Microbial contamination and labelling of self-prepared, multi-dose phenylephrine solutions used at a teaching hospital. *Southern African Journal of Anaesthesia and Analgesia* 2016;22:175-79.
32. Westbrook JI, Rob MI, Woods A, et al. Errors in the administration of intravenous medications in hospital and the role of correct procedures and nurse experience. *BMJ Qual Saf* 2011;20:1027-34.
33. Wheeler DW, Degnan BA, Sehmi JS, et al. Variability in the concentrations of intravenous drug infusions prepared in a critical care unit. *Intensive Care Med* 2008;34:1441-7.
34. Yin TS, Said MM, Rahman RA, et al. An investigation of errors: The preparation and administration of parenteral medications in an intensive care unit of a tertiary teaching hospital in Malaysia. *Int J Pharm Pharm Sci* 2016;8:325-29.
35. Otero Lopez MJ, Castano Rodriguez B, Perez Encinas M, et al. [Updated classification for medication errors by the Ruiz-Jarabo 2000 Group]. *Farm Hosp* 2008;32:38-52.





# PRISMA 2009 Checklist

1  
2  
3  
4  
5  
6  
7  
8  
9  
10  
11  
12  
13  
14  
15  
16  
17  
18  
19  
20  
21  
22  
23  
24  
25  
26  
27  
28  
29  
30  
31  
32  
33  
34  
35  
36  
37  
38  
39  
40  
41  
42  
43  
44  
45  
46  
47  
48  
49

| Section/topic                      | #  | Checklist item                                                                                                                                                                                                                                                                                              | Reported on page # |
|------------------------------------|----|-------------------------------------------------------------------------------------------------------------------------------------------------------------------------------------------------------------------------------------------------------------------------------------------------------------|--------------------|
| <b>TITLE</b>                       |    |                                                                                                                                                                                                                                                                                                             |                    |
| Title                              | 1  | Identify the report as a systematic review, meta-analysis, or both.                                                                                                                                                                                                                                         | 1                  |
| <b>ABSTRACT</b>                    |    |                                                                                                                                                                                                                                                                                                             |                    |
| Structured summary                 | 2  | Provide a structured summary including, as applicable: background; objectives; data sources; study eligibility criteria, participants, and interventions; study appraisal and synthesis methods; results; limitations; conclusions and implications of key findings; systematic review registration number. | 2                  |
| <b>INTRODUCTION</b>                |    |                                                                                                                                                                                                                                                                                                             |                    |
| Rationale                          | 3  | Describe the rationale for the review in the context of what is already known.                                                                                                                                                                                                                              | 4-5                |
| Objectives                         | 4  | Provide an explicit statement of questions being addressed with reference to participants, interventions, comparisons, outcomes, and study design (PICOS).                                                                                                                                                  | 5                  |
| <b>METHODS</b>                     |    |                                                                                                                                                                                                                                                                                                             |                    |
| Protocol and registration          | 5  | Indicate if a review protocol exists, if and where it can be accessed (e.g., Web address), and, if available, provide registration information including registration number.                                                                                                                               | 10                 |
| Eligibility criteria               | 6  | Specify study characteristics (e.g., PICOS, length of follow-up) and report characteristics (e.g., years considered, language, publication status) used as criteria for eligibility, giving rationale.                                                                                                      | 7                  |
| Information sources                | 7  | Describe all information sources (e.g., databases with dates of coverage, contact with study authors to identify additional studies) in the search and date last searched.                                                                                                                                  | 7-8                |
| Search                             | 8  | Present full electronic search strategy for at least one database, including any limits used, such that it could be repeated.                                                                                                                                                                               | 41-43              |
| Study selection                    | 9  | State the process for selecting studies (i.e., screening, eligibility, included in systematic review, and, if applicable, included in the meta-analysis).                                                                                                                                                   | 8-9                |
| Data collection process            | 10 | Describe method of data extraction from reports (e.g., piloted forms, independently, in duplicate) and any processes for obtaining and confirming data from investigators.                                                                                                                                  | 9-10               |
| Data items                         | 11 | List and define all variables for which data were sought (e.g., PICOS, funding sources) and any assumptions and simplifications made.                                                                                                                                                                       | 10                 |
| Risk of bias in individual studies | 12 | Describe methods used for assessing risk of bias of individual studies (including specification of whether this was done at the study or outcome level), and how this information is to be used in any data synthesis.                                                                                      | 10                 |
| Summary measures                   | 13 | State the principal summary measures (e.g., risk ratio, difference in means).                                                                                                                                                                                                                               | 10                 |
| Synthesis of results               | 14 | Describe the methods of handling data and combining results of studies, if done, including measures of consistency (e.g., $I^2$ for each meta-analysis).                                                                                                                                                    | n/a                |

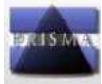

# PRISMA 2009 Checklist

Page 1 of 2

| Section/topic                 | #  | Checklist item                                                                                                                                                                                           | Reported on page # |
|-------------------------------|----|----------------------------------------------------------------------------------------------------------------------------------------------------------------------------------------------------------|--------------------|
| Risk of bias across studies   | 15 | Specify any assessment of risk of bias that may affect the cumulative evidence (e.g., publication bias, selective reporting within studies).                                                             | n/a                |
| Additional analyses           | 16 | Describe methods of additional analyses (e.g., sensitivity or subgroup analyses, meta-regression), if done, indicating which were pre-specified.                                                         | n/a                |
| <b>RESULTS</b>                |    |                                                                                                                                                                                                          |                    |
| Study selection               | 17 | Give numbers of studies screened, assessed for eligibility, and included in the review, with reasons for exclusions at each stage, ideally with a flow diagram.                                          | 11                 |
| Study characteristics         | 18 | For each study, present characteristics for which data were extracted (e.g., study size, PICOS, follow-up period) and provide the citations.                                                             | 13-16              |
| Risk of bias within studies   | 19 | Present data on risk of bias of each study and, if available, any outcome level assessment (see item 12).                                                                                                | n/a                |
| Results of individual studies | 20 | For all outcomes considered (benefits or harms), present, for each study: (a) simple summary data for each intervention group (b) effect estimates and confidence intervals, ideally with a forest plot. | n/a                |
| Synthesis of results          | 21 | Present results of each meta-analysis done, including confidence intervals and measures of consistency.                                                                                                  | n/a                |
| Risk of bias across studies   | 22 | Present results of any assessment of risk of bias across studies (see Item 15).                                                                                                                          | n/a                |
| Additional analysis           | 23 | Give results of additional analyses, if done (e.g., sensitivity or subgroup analyses, meta-regression [see Item 16]).                                                                                    | n/a                |
| <b>DISCUSSION</b>             |    |                                                                                                                                                                                                          |                    |
| Summary of evidence           | 24 | Summarize the main findings including the strength of evidence for each main outcome; consider their relevance to key groups (e.g., healthcare providers, users, and policy makers).                     | 26                 |
| Limitations                   | 25 | Discuss limitations at study and outcome level (e.g., risk of bias), and at review-level (e.g., incomplete retrieval of identified research, reporting bias).                                            | 30                 |
| Conclusions                   | 26 | Provide a general interpretation of the results in the context of other evidence, and implications for future research.                                                                                  | 30                 |
| <b>FUNDING</b>                |    |                                                                                                                                                                                                          |                    |
| Funding                       | 27 | Describe sources of funding for the systematic review and other support (e.g., supply of data); role of funders for the systematic review.                                                               | 31                 |

From: Moher D, Liberati A, Tetzlaff J, Altman DG, The PRISMA Group (2009). Preferred Reporting Items for Systematic Reviews and Meta-Analyses: The PRISMA Statement. PLoS Med 6(6): e1000097. doi:10.1371/journal.pmed1000097

For more information, visit: [www.prisma-statement.org](http://www.prisma-statement.org).

Page 2 of 2

For peer review only - <http://bmjopen.bmj.com/site/about/guidelines.xhtml>
